# Supplementary material for: Comparing restrictive versus liberal oxygen strategies for trauma patients — the TRAUMOX2 trial: protocol for a randomised clinical trial
Source: PubMed Central journal article supplement — BMJ Open. 2022 Nov 7;12(11):e064047. doi: 10.1136/bmjopen-2022-064047 (PMC9644337; doi:10.1136/bmjopen-2022-064047), 2022-11-07
Supplement: bmjopen-2022-064047.draft_revisions.pdf [file bmjopen-2022-064047.draft_revisions.pdf]

# BMJ Open

BMJ Open is committed to open peer review. As part of this commitment we make the peer review history of every article we publish publicly available.

When an article is published we post the peer reviewers' comments and the authors' responses online. We also post the versions of the paper that were used during peer review. These are the versions that the peer review comments apply to.

The versions of the paper that follow are the versions that were submitted during the peer review process. They are not the versions of record or the final published versions. They should not be cited or distributed as the published version of this manuscript.

BMJ Open is an open access journal and the full, final, typeset and author-corrected version of record of the manuscript is available on our site with no access controls, subscription charges or pay-per-view fees (<http://bmjopen.bmj.com>).

If you have any questions on BMJ Open's open peer review process please email [info.bmjopen@bmj.com](mailto:info.bmjopen@bmj.com)

# BMJ Open

## Comparing Restrictive vs. Liberal Oxygen Strategies for Trauma Patients: The TRAUMOX2 Trial

|                               |                                                                                                                                                                                                                                                                                                                                                                                                                                                                                                                                                                                                                                                                                                                                                                                                                                                                                                                                                                                                                                                                                                                                                                                                                                                                                                                                                                                                                                                                                                                                                                                                                                                                                                                                                                                                                                                                                                                                                                                                                                                                                                                                                                                                                                                                                               |
|-------------------------------|-----------------------------------------------------------------------------------------------------------------------------------------------------------------------------------------------------------------------------------------------------------------------------------------------------------------------------------------------------------------------------------------------------------------------------------------------------------------------------------------------------------------------------------------------------------------------------------------------------------------------------------------------------------------------------------------------------------------------------------------------------------------------------------------------------------------------------------------------------------------------------------------------------------------------------------------------------------------------------------------------------------------------------------------------------------------------------------------------------------------------------------------------------------------------------------------------------------------------------------------------------------------------------------------------------------------------------------------------------------------------------------------------------------------------------------------------------------------------------------------------------------------------------------------------------------------------------------------------------------------------------------------------------------------------------------------------------------------------------------------------------------------------------------------------------------------------------------------------------------------------------------------------------------------------------------------------------------------------------------------------------------------------------------------------------------------------------------------------------------------------------------------------------------------------------------------------------------------------------------------------------------------------------------------------|
| Journal:                      | <i>BMJ Open</i>                                                                                                                                                                                                                                                                                                                                                                                                                                                                                                                                                                                                                                                                                                                                                                                                                                                                                                                                                                                                                                                                                                                                                                                                                                                                                                                                                                                                                                                                                                                                                                                                                                                                                                                                                                                                                                                                                                                                                                                                                                                                                                                                                                                                                                                                               |
| Manuscript ID                 | bmjopen-2022-064047                                                                                                                                                                                                                                                                                                                                                                                                                                                                                                                                                                                                                                                                                                                                                                                                                                                                                                                                                                                                                                                                                                                                                                                                                                                                                                                                                                                                                                                                                                                                                                                                                                                                                                                                                                                                                                                                                                                                                                                                                                                                                                                                                                                                                                                                           |
| Article Type:                 | Protocol                                                                                                                                                                                                                                                                                                                                                                                                                                                                                                                                                                                                                                                                                                                                                                                                                                                                                                                                                                                                                                                                                                                                                                                                                                                                                                                                                                                                                                                                                                                                                                                                                                                                                                                                                                                                                                                                                                                                                                                                                                                                                                                                                                                                                                                                                      |
| Date Submitted by the Author: | 25-Apr-2022                                                                                                                                                                                                                                                                                                                                                                                                                                                                                                                                                                                                                                                                                                                                                                                                                                                                                                                                                                                                                                                                                                                                                                                                                                                                                                                                                                                                                                                                                                                                                                                                                                                                                                                                                                                                                                                                                                                                                                                                                                                                                                                                                                                                                                                                                   |
| Complete List of Authors:     | <p>Baekgaard, Josefine; Rigshospitalet, Department of Anaesthesia and Trauma Centre, Centre of Head and Orthopaedics, University of Copenhagen</p> <p>Arleth, Tobias; Rigshospitalet, Department of Anaesthesia and Trauma Centre, Centre of Head and Orthopaedics, University of Copenhagen</p> <p>Siersma, Volkert; University of Copenhagen, The Research Unit for General Practice and Section of General Practice, Department of Public Health</p> <p>Hinkelbein, Jochen; University Hospital Cologne, Department of Anaesthesiology and Intensive Care Medicine, Faculty of Medicine</p> <p>Yucetepe, Sirin; University Hospital Cologne, Department of Anaesthesiology and Intensive Care Medicine, Faculty of Medicine</p> <p>Klimek, M; Erasmus MC, Department of Anaesthesiology, University Medical Centre Rotterdam</p> <p>van Vledder, Mark; Erasmus MC, Trauma Research Unit Department of Surgery, University Medical Centre Rotterdam</p> <p>Van Lieshout, Esther M.M.; Erasmus MC, Trauma Research Unit Department of Surgery, University Medical Centre Rotterdam</p> <p>Mikkelsen, Søren; University of Southern Denmark, The Prehospital Research Unit; Odense University Hospital, Department of Anaesthesiology and Intensive Care</p> <p>Zwisler, Stine; University of Southern Denmark, The Prehospital Research Unit; Odense University Hospital, Department of Anaesthesiology and Intensive Care</p> <p>Andersen, M. S.; Aarhus University Hospital, Department of Anaesthesiology</p> <p>Fenger-Eriksen, Christian; Aarhus University Hospital, Department of Anaesthesiology</p> <p>Isbye, Dan; Rigshospitalet, Department of Anaesthesia and Trauma Centre, Centre of Head and Orthopaedics, Rigshospitalet, University of Copenhagen, Denmark; University of Copenhagen, Institute of Clinical Medicine</p> <p>Rasmussen, Lars; Rigshospitalet, Department of Anaesthesia and Trauma Centre, Centre of Head and Orthopaedics, Rigshospitalet, University of Copenhagen; University of Copenhagen, Institute of Clinical Medicine</p> <p>Steinmetz, Jacob; Rigshospitalet, Department of Anaesthesia and Trauma Centre, Centre of Head and Orthopaedics, Rigshospitalet, University of Copenhagen; University of Copenhagen, Institute of Clinical Medicine</p> |

1  
2  
3  
4  
5  
6  
7  
8  
9  
10  
11  
12  
13  
14  
15  
16  
17  
18  
19  
20  
21  
22  
23  
24  
25  
26  
27  
28  
29  
30  
31  
32  
33  
34  
35  
36  
37  
38  
39  
40  
41  
42  
43  
44  
45  
46  
47  
48  
49  
50  
51  
52  
53  
54  
55  
56  
57  
58  
59  
60

|           |                                                                                                                                                 |
|-----------|-------------------------------------------------------------------------------------------------------------------------------------------------|
| Keywords: | Adult anaesthesia < ANAESTHETICS, Adult intensive & critical care < ANAESTHETICS, TRAUMA MANAGEMENT, Respiratory physiology < THORACIC MEDICINE |
|           |                                                                                                                                                 |

SCHOLARONE™  
Manuscripts

## Comparing Restrictive vs. Liberal Oxygen Strategies for Trauma Patients:

### The TRAUMOX2 Trial

*Josefine Baekgaard, MD Ph.D. (1); Tobias Arleth, MD (1); Volkert Siersma, PhD (2); Jochen Hinkelbein, MD, Dr. Med. DESA, EDIC, FAsMA (3); Sirin Yücecepe, MD (3); Markus Klimek, MD, Ph.D. (4); Mark G. Van Vledder, MD, Ph.D. (5); Esther M.M. Van Lieshout, Ph.D., MSc (5); Søren Mikkelsen, MD, Ph.D. (6,7); Stine Thorhaug Zwisler, MD, Ph.D. (6,7); Mikkel Andreas Strømgaard Andersen, MD, Ph.D. (8); Christian Fenger-Eriksen, MD, Ph.D. (8); Dan L. Isbye, MD, Ph.D. (1, 9); Lars Simon Rasmussen, MD, Ph.D., DMSc. (1, 9); Jacob Steinmetz, MD, Ph.D. (1, 9, 10)*

1. Department of Anaesthesia and Trauma Centre, Centre of Head and Orthopaedics, Rigshospitalet, University of Copenhagen, Denmark
2. The Research Unit for General Practice and Section of General Practice, Department of Public Health, University of Copenhagen, Copenhagen, Denmark
3. Department of Anaesthesiology and Intensive Care Medicine, Faculty of Medicine and University Hospital of Cologne, Germany
4. Department of Anaesthesiology, Erasmus MC, University Medical Centre Rotterdam, Rotterdam, The Netherlands
5. Trauma Research Unit Department of Surgery, Erasmus MC, University Medical Centre Rotterdam, Rotterdam, The Netherlands
6. The Prehospital Research Unit, Region of Southern Denmark, University of Southern Denmark, Odense, Denmark
7. Department of Anaesthesiology and Intensive Care, Odense University Hospital, Odense, Denmark

1  
2  
3  
4  
5  
6  
7 8. Department of Anaesthesiology, Aarhus University Hospital

8  
9 9. Institute of Clinical Medicine, University of Copenhagen, Denmark

10  
11 10. Danish Air Ambulance, Aarhus, Denmark  
12  
13  
14  
15  
16

17 **Corresponding author:**

18  
19  
20 Josefine Baekgaard, MD, Ph.D.

21  
22 e-mail: [josefinebaekgaard@me.com](mailto:josefinebaekgaard@me.com)

23  
24 Affiliation: Department of Anaesthesia and Trauma Centre, Centre of Head and Orthopaedics, Rigshospitalet,

25  
26 University of Copenhagen, Denmark  
27  
28  
29  
30  
31  
32  
33  
34  
35  
36  
37  
38  
39  
40  
41  
42  
43  
44  
45  
46  
47  
48  
49  
50  
51  
52  
53  
54  
55  
56  
57  
58  
59  
60

## General information and administrative Structure

Chief investigator and sponsor: Jacob Steinmetz

Coordinating investigator: Tobias Arleth

Study coordinator: Josefine Baekgaard

Steering Committee (in alphabetic order): Jacob Steinmetz, Jochen Hinkelbein, Josefine Baekgaard, Lars Simon Rasmussen, Markus Klimek, Tobias Arleth

Statistician: Volkert Siersma

Primary investigators: Jochen Hinkelbein, Mikkel Andreas Strømgaard Andersen, Søren Mikkelsen, Mark van Vledder

Data monitoring and safety committee: Bodil Steen Rasmussen (chairman, physician), Marius Rehn (member, physician), Lars Wiuff Andersen (member, physician) and Brice Ozenne (member, biostatistician)

## ABSTRACT

**Introduction:** Supplemental oxygen is commonly used in trauma patients, although it may lead to hyperoxaemia that has been associated with pulmonary complications and increased mortality. The primary objective of this trial, TRAUMOX2, is to compare a restrictive versus a liberal oxygen strategy the first eight hours following trauma.

**Methods and Analysis:** TRAUMOX2 is an investigator-initiated, international, parallel-grouped, superiority, outcome assessor- and analyst-blinded, randomised, controlled, clinical trial.

Adult patients with suspected major trauma are included and randomised to eight hours of a restrictive or liberal oxygen strategy. The restrictive group receives the lowest dosage of oxygen ( $\geq 21\%$ ) that ensures an SpO<sub>2</sub> of 94%. The liberal group receives 12-15 L O<sub>2</sub>/min or FiO<sub>2</sub>=0.6-1.0.

The primary outcome is mortality and/or major respiratory complications (pneumonia and/or ARDS) within 30 days (composite outcome).

With 710 participants in each arm we will be able to detect a 33% risk reduction with a restrictive oxygen strategy if the incidence of our primary outcome is 15% in the liberal group.

**Ethics and dissemination:** TRAUMOX2 is carried out in accordance with the Helsinki II Declaration. It has been approved by the Danish Committee on Health Research Ethics for the Capital Region (H-21018062) and The Danish Medicines Agency, as well as the Dutch Medical Research Ethics Committee Erasmus MS (NL79921.078.21 and MEC-2021-0932). A website ([www.traumox2.org](http://www.traumox2.org)) is available for updates and the study results will be published in an international peer-reviewed scientific journal.

### Strengths and limitations

- TRAUMOX2 will provide high-level evidence on the use of supplemental oxygen for trauma patients
- Although the arterial oxygen tension is a more accurate measure of tissue exposure to oxygen, the intervention in TRAUMOX2 is based on inspiratory oxygen fraction to ensure feasibility in the acute care setting and detect pulmonary oxygen toxicity

**Registration details:** European Union Drug Regulating Authorities Clinical Trials Database (EudraCT) (2021-000556-19); [www.clinicaltrials.gov](http://www.clinicaltrials.gov). (NCT05146700)

## INTRODUCTION

### BACKGROUND AND RATIONALE

In trauma resuscitation supplemental oxygen is often administered to treat or prevent hypoxaemia as recommended by the Advanced Trauma Life Support manual.[1] This guideline does not have a specific therapeutic goal. Oxygen is administered in many other situations too, sometimes in a non-consistent manner[2–4] and very often without even being prescribed.[5] In a recent systematic review our group found the evidence for the use of supplemental oxygen in the trauma population to be sparse.[6] Nevertheless, in a large retrospective study on 864,340 trauma patients a propensity score matching analysis showed the administration of supplemental oxygen was associated with a significantly increased risk of in-hospital mortality and acute respiratory distress syndrome (ARDS).[7] Furthermore, a recent systematic review and meta-analysis comparing liberal versus restrictive oxygen strategy for a broad mix of acutely ill medical and surgical patients found an association between liberal oxygen administration and increased mortality.[8] Of note, only one small study on trauma patients (patients with traumatic brain injury), which did not report mortality data, was included. Conversely this study showed that degree of disability was significantly reduced at six months in the group receiving liberal compared to restrictive oxygen.[9]

Hyperoxaemia is a common finding in trauma patients[5,10] and in mechanically ventilated patients in general.[11,12] However, in the Intensive Care Unit (ICU) and in surgical patients hyperoxaemia has been associated with major pulmonary complications.[13,14] For example, a recent retrospective study found hyperoxaemia to be an independent risk factor for ventilator associated pneumonia .[14] Nevertheless, a highly debated recommendation from the World Health Organisation states that adult patients undergoing general anaesthesia for surgical procedures should receive an  $\text{FiO}_2$  of 80% intraoperatively as well as in the immediate postoperative period for two to six hours to reduce the risk of surgical site infection.[15] A randomised study, however, found no difference in the risk of surgical site infection according to  $\text{FiO}_2$  concentration intraoperatively.[16] Furthermore, a study on 152,000 mechanically ventilated patients found no association between hyperoxia and mortality during the first 24 hours in the ICU,[17] and another study on 14,000 mixed ICU patients found that a  $\text{PaO}_2$  of approximately 18 kPa resulted in the lowest mortality.[18] Finally, a recent study randomised 2928 ICU patients to either low or high arterial oxygen tension target (defined as 8 vs 12 kPa), for a maximum of 90 days and found no difference in mortality.[19]

Therefore, whether the trauma population could benefit from a more restrictive supplemental oxygen approach than recommended by current international trauma guidelines presents a large and important knowledge gap. In a recent pilot randomised clinical trial (*TRAUMOX1*[20], Clinicaltrials.gov Registration number: NCT03491644) we compared a restrictive and a liberal oxygen strategy for 24 hours after trauma (N=41) and found maintenance of normoxaemia following trauma using a restrictive oxygen strategy to be feasible. The study served as the basis for the following larger clinical trial; *TRAUMOX2*.

In *TRAUMOX2* we hypothesize that a restrictive compared to a liberal oxygen strategy for eight hours following trauma will result in a lower rate of 30-day mortality and/or major respiratory complications (pneumonia and/or ARDS) (combined endpoint).



## METHODS

### *Study setting*

The protocol has been written according to the Standard Protocol Items: Recommendations for Interventional Trials (SPIRIT) 2013 statement.[21] The SPIRIT 2013 checklist is presented in Appendix 1.

TRAUMOX2 is an investigator-initiated, international, multicentre, parallel-grouped, superiority, outcome assessor- and analyst-blinded, randomised, controlled, clinical trial.

Participating trauma centres must be able to provide definitive treatment of trauma patients (tertiary care i.e. no transfer to more specialized institution needed), possess a trauma registry, and have an average of approximately 400 trauma patients per year. All trauma centres must be within the EU and thus the EU Clinical Trial Regulation are applied. A complete list of the study sites can be viewed on the trial website ([www.traumox2.org](http://www.traumox2.org)).

### *Eligibility criteria*

Patients aged 18 years or older, including fertile women, are included. Participants must have undergone blunt or penetrating trauma, be directly transferred from the scene of accident to one of the participating trauma centres and trigger trauma team activation (no secondary transfers from other hospitals). Moreover, the including physician must initially expect a hospital length of stay for 24 hours or longer. Patients with no/minor injuries after secondary survey are excluded if they are expected to be discharged within 24 hours to ensure only patients with a substantial trauma are included. Patients in cardiac arrest before or on admission and patients with a suspicion of carbon monoxide intoxication are excluded.

### *Interventions*

Participants are randomised to eight hours of either restrictive or liberal supplemental oxygen treatment. The restrictive group receives the lowest dosage of oxygen ( $\geq 21\%$ ) that ensures an arterial oxyhaemoglobin saturation ( $SpO_2$ ) target of 94% either using no supplemental oxygen, a nasal cannula, a non-rebreather mask, or mechanical ventilation (intubated patients). Thus, only trial participants without a need for supplemental oxygen to maintain an  $SpO_2 \geq 94\%$  can saturate above 94%. The liberal group receives 15 L  $O_2$ /min via a non-rebreather mask for non-intubated trial participants and an  $FiO_2=1.0$  for intubated trial patients in the prehospital setting, in the trauma bay and during intrahospital transportation. In the operating room, ICU, post-anaesthesia care unit and ward the flow/ $FiO_2$  may be reduced to 12 L  $O_2$ /min/ $FiO_2=0.6$  if the arterial oxygen saturation  $\geq 98\%$ . In both groups, pre-oxygenation should be done prior to intubation.

### *Outcomes*

The primary outcome is the incidence of 30-day mortality and/or major respiratory complications (pneumonia and/or ARDS) (composite outcome). Secondary outcomes include mortality at 30 days and 12 months post trauma, major respiratory complications (pneumonia and acute respiratory distress syndrome) within 30 days, hospital length of stay (HOS LOS), ICU length of stay (ICU LOS), days alive outside the ICU, time on mechanical ventilation (until 30 days), days alive without mechanical ventilation, re-intubation within 30 days, pneumonia post-discharge, surgical site infections within 30 days, episodes with hypoxaemia during intervention ( $SpO_2 < 90\%$ ), and EQ-5D-5L score at six and 12 months post trauma, and Glasgow Outcome Scale-Extended (GOSE) at six and 12 months post trauma. The EQ-5D-5L score is a widely used generic measure for health-related quality of life, and [22] GOSE assesses physical and mental consequences of traumatic brain injury.[23]

### *Randomisation*

1  
2  
3  
4 Patients are randomised 1:1 in variable block sizes and stratified by centre (prehospital base or trauma centre) and  
5 tracheal intubation at inclusion. The randomisation table is generated outside of REDCap by a statistician otherwise  
6 not affiliated with the study. The allocation sequence list and block size are only known by the statistician and will  
7 remain concealed from the investigators. Prior to randomisation, a proxy consent must be obtained (or according to  
8 legislation in each country). Afterwards, randomisation is determined by opening a concealed envelope with  
9 information on allocation. The envelopes are available both pre- and in-hospital. Each concealed envelope contains a  
10 study ID that matches a study ID on the randomisation list generated by the statistician.  
11  
12

#### 13 14 *Participant timeline*

15  
16 Please see figure 1.

#### 17 18 *Blinding*

19  
20 The study outcome assessor- and analyst-blinded with regards to treatment: treating staff are aware of the trial  
21 participants' randomisation group. However, at least two allocation blinded primary outcome assessors (specialists in  
22 anaesthesia, intensive care, emergency medicine or similar) are appointed in each country to assess in-hospital lung  
23 complications (pneumonia and/or ARDS). Blinding is ensured by concealing all information indicative of the allocation  
24 prior to assessment.

25  
26 The statistician and manuscript writers will be blinded towards the allocation of treatment once the trial ends when  
27 data is being analysed and the manuscript is drafted.  
28

#### 29 30 *Recruitment and assignment of interventions*

31  
32 Depending on the possibilities of the recruiting site, patients are randomised and included either in the prehospital  
33 phase or in the trauma bay:

##### 34 35 *Prehospital phase (optional)*

36  
37 As soon as possible and after immediate and necessary life-saving procedures have been performed, a prehospital  
38 emergency physician (the including physician) assesses a patient eligible for inclusion. If all inclusion criteria are met,  
39 the including physician obtains proxy consent through a legally appointed study guardian (physician) by telephone.  
40 Proxy consent before inclusion may not be necessary in all participating countries. National rules and laws are  
41 followed in the specific country on both proxy consent as well as trial participant/trial participant's next-of-kin consent  
42 in general. Once the trauma patient is included, the including physician randomises the trial participant to the  
43 intervention (restrictive oxygen strategy) or control (liberal oxygen strategy) group by opening a concealed envelope  
44 with information on the allocation. The including physician registers the trial participant in an electronic database. If  
45 the trial participant is transported by helicopter, it is advised to fly at the lowest reasonable altitude to reduce the  
46 alterations from normal atmospheric oxygen tension at sea level. Treatment is initiated and continued for eight hours  
47 after enrolment. Time of initiation equals T0 (see figure 1).  
48  
49

##### 50 51 *Trauma bay*

52  
53 As soon as possible or after immediate and necessary life-saving procedures have been performed the including  
54 physician (e.g. the trauma leader or an attending anaesthesiologist) judges whether the patient is eligible for the  
55 study. If eligible, the including physician obtains proxy consent through a legally appointed study guardian (physician).  
56 Proxy consent before inclusion may not be necessary in all participating countries. National law is followed in the  
57 specific country on both proxy consent as well as trial participant/trial participant's next-of-kin consent in general.  
58 Once the trauma patient is included, the including physician randomises the trial participant to the intervention  
59  
60

1  
2  
3  
4 (restrictive oxygen strategy) or control (liberal oxygen strategy) group by opening a concealed envelope with  
5 information on allocation. The including physician registers the trial participant in an electronic database. Treatment is  
6 initiated and continued for eight hours after enrolment. Time of initiation equals T0 (see figure 1) and must not be  
7 delayed more than 90 minutes after hospital arrival.  
8

#### 9 10 *Consent*

11 Consent procedures vary according to including location. In broad terms, the patients eligible for inclusion in the trial  
12 are temporarily incompetent because of the acute and severe condition related to their traumatic injuries. The trauma  
13 patients are eligible either on the scene of accident or upon arrival in the trauma bay where early resuscitation with  
14 the use of multiple interventions and even surgery may be necessary. Symptoms include severe pain, impaired  
15 consciousness, and early complications are circulatory and respiratory failure requiring emergency intubation. Some  
16 of these trial participants are expected to die. The intervention tested in this trial is pivotal to be given immediately in  
17 the early phase of resuscitation. In clinical trials aiming to improve treatment of traumatic injuries it is necessary to  
18 include unconscious and incompetent patients as no clinically relevant animal model exists. As soon as possible, local  
19 consent procedures are followed. In Denmark, proxy consent is first obtained through a legally appointed study  
20 guardian. Hereafter, consent is sought by the trial participants' next-of-kin as soon as possible, and when possible,  
21 consent is sought by the trial participant. If the trial participant is not able to consent within 30 days, consent from the  
22 next-of-kin is accepted as the final consent. If the next-of-kin is unavailable, a secondary proxy consent can be  
23 obtained through a legally appointed study guardian, and this can also be accepted as the final consent. Detailed  
24 consent procedures in specific locations can be found on the trial website.  
25  
26  
27

#### 28 29 *Data collection methods, registration, and monitoring*

30 Oxygen dosages and saturations are recorded every hour and two arterial blood gas analyses are obtained and noted  
31 in a paper data collection sheet specifically made for this study ("Randomisation, data collection sheet and REDCap  
32 inclusion", available on the study website). Further data collection is obtained by accessing the trial participants'  
33 medical records. Data points include trial participant characteristics (name, unique patient identifier, age, sex, height,  
34 weight), prehospital data (vital signs, trauma mechanism, details on supplemental oxygen in the prehospital phase  
35 (indication, SpO<sub>2</sub>, supplemental oxygen yes/no, intubation yes/no, oxygen flow/FiO<sub>2</sub>), Injury Severity Score, complete  
36 list of injuries, transportation mode to the trauma bay), time points (date and time of trauma, on-scene arrival and  
37 departure, trauma bay arrival, ICU/ward arrival, time of intubation/extubation/re-intubation for intubated trial  
38 participants, time of surgery, duration of surgery), hospital and ICU length of stay, vital signs on arrival to the trauma  
39 bay (including arterial blood gas analysis if available), in-hospital variables (pneumonia, ARDS, other infections  
40 (surgical site infection or sepsis)), ischaemic events within 7 days after admission (myocardial infarction or cerebral  
41 ischemia), Adverse Events and Serious Adverse Events (SAE), co-morbidities prior to trauma (categorised in heart  
42 disease, lung disease, other diseases), active smoker (yes/no), specifics of possible brain injury (type and extent) and  
43 other cerebral complications, and time until of death.  
44  
45  
46  
47

48 Trial participants with traumatic brain injury admitted to a neurosurgical intensive care unit can be monitored  
49 according to standard practice in the local facility. It is acceptable, but optional, to perform continuous  
50 intraparenchymal brain oxygen measurements.  
51

52  
53 For all TRAUMOX2 trial participants it is possible to deviate from the protocol if clinically justified by the treating  
54 physician. Such deviations should always be documented including the clinical justification.  
55

56 Mortality status is collected through local registries or according to local practice. EQ-5D-5L and GOSE score are  
57 collected through telephone interviews, either with the trial participant or with the trial participant's next-of-kin or  
58  
59  
60

caregiver. Possible pneumonia post-discharge is evaluated through medicines prescribed after hospital discharge in countries where this information is available.

All trial participants will have two arterial blood gasses (ABGs) drawn within the intervention period. The first ABG is drawn at hour  $1 \pm 30$  minutes (T1) after randomisation (initiation of intervention is considered hour 0). If an ABG is not obtainable at hour 1 due to still being prehospital or other circumstances, the ABG must be obtained as soon as possible. The second ABG is drawn at hour  $6 \pm 2$  hours (T6). If more than two ABGs are collected during the intervention (ABGs not related to the study), the ABGs closest to the specified time slots (T1 and T6) should be used for data entry.

Furthermore, the trial participant or his/her next-of-kin is asked for an additional and separate consent form, not directly related to this research project, to have their blood stored in a biobank established for future research. It is optional whether the participating centres contribute to the biobank.

Data is stored in an electronic, web-based, secure, centralised, user-friendly interface using a data collection sheet in REDCap[24] specifically made for this trial. This data management system is secure, fully compliant with all regulatory guidelines and a complete audit-trail for data entry validation. Trained members of the research team are responsible for data collection and entry into REDCap using local electronic clinical registries. Therefore, the electronic case report form (eCRF) is digital. In case of system malfunction, a paper version of the data collection sheet is available. The REDCap database is set up from Rigshospitalet in the Capital Region in Denmark and participating centres are invited to data entry in this database.

External monitoring of registered data is applied at all trial centres.

### Definitions

**Pneumonia** is defined as per the CDC criteria[25].

**ARDS** is defined as per the Berlin definition[26].

**Traumatic brain injury** is defined as[27]:

- Severe: AIS  $\geq 5$
- Moderate: AIS 3–4
- Mild: AIS 1–2

Please see figure 2 for a detailed description of pneumonia and ARDS.

### Statistical Analysis

In larger studies, mortality from trauma has been estimated to be around 6-12%,[28] and the incidence of ventilator associated pneumonia post trauma to be almost 30%.[14] With 710 trial participants in each arm, we will be able to detect a 33% risk reduction with a restrictive supplemental oxygen strategy (with 80% power at the 5% significance level) if the incidence of our primary outcome is 15% in the liberal group. Our primary analysis will be a modified intention-to-treat analysis, but a per-protocol analysis will also be carried out. A detailed statistical analysis plan, including the pre-specified subgroup analyses, will be made. In the primary analysis, we will exclude trial participants where no injuries are found, defined as Injury Severity Score=0.

1  
2  
3  
4 If less than 5% of data required for any specific analysis on primary or secondary outcomes are missing, a complete  
5 case analysis will be performed. If more than 5% are missing, and it is concluded that data are not 'missing completely  
6 at random' inverse probability weighting will be used to correct possible bias.[29] A sensitivity analysis on the  
7 assumptions used for missing data will be done to verify robustness.  
8

9  
10 Inclusion of trial participants will end when the goal of 1420 evaluable trial participants has been reached including  
11 the 30-day follow up period. This means that the maximum number of trial participants will be 1600 as inclusion will  
12 continue during evaluation of the 30-day follow-up. EQ-5D-5L score and GOSE score at six months and 12 months will  
13 be obtained. Mortality at 30 days and 12 months will also be obtained. The primary composite outcome will be  
14 compared between the two groups using logistic regression reported as Odds Ratio with 95% CI. The primary analysis  
15 will be adjusted for age, sex, centre, intubated at randomisation (yes/no), and known pneumonia on admission (under  
16 treatment). Secondary outcomes will also be compared between the two groups using logistic regression for  
17 dichotomous data and linear regression for continuously valued outcomes. We will use a 5% significance level. Any  
18 changes or additional analyses will be reported.  
19

20  
21 In the per-protocol analysis, all trial participants with  $\geq 1$  major protocol violation will be removed.  
22

23 Specified subgroup analyses will be made on trial participants initially intubated (within one hour of the accident)  
24 (yes/no), trial participants with ICU admission (yes/no), trial participants with moderate and severe traumatic brain  
25 injuries (yes/no), trial participants with chronic pulmonary disease (yes/no), registered episodes with hypoxaemia as  
26 well as an analysis on trial participants enrolled prehospital versus in-hospital. An analysis adjusted for Injury Severity  
27 Score will also be conducted.  
28

29  
30 The statistical analysis will be performed by a statistician.  
31  
32  
33

#### 34 *Adverse and serious adverse events*

35  
36 To monitor adverse events a TRAUMOX2 investigator assesses the trial participant's medical record once within the  
37 first 24 hours and every third day until discharge (maximum of 30 days).  
38

39 This group of trial participants are expected to have a lot of complications. It is the established practice in trials on  
40 critically ill patients that adverse events are part of the natural trajectory of the primary disease process or expected  
41 complications of the critical illness.[30] Therefore, we have chosen to record only the occurrence of atelectasis and  
42 irritability of airway mucosa.  
43

44 All SAEs are registered. The registration is done in REDCap and once a SAE registration is complete, the sponsor and  
45 coordinating investigator receives an e-mail notification immediately via the REDCap notification e-mail system.  
46

#### 47 *Ethics and dissemination*

48  
49 Trial participant insurances are in place at all trial sites either through the national health insurance or through  
50 specifically supplied local trial insurances as required according to the specific trial sites and national regulations.  
51

52 This RCT is carried out in accordance with the principles from the Helsinki II Declaration in its latest version.[31] The  
53 protocol has been approved by the Danish Committee on Health Research Ethics for the Capital Region of Denmark  
54 (H-21018062) and The Danish Medicines Agency, as well as the Dutch Medical Research Ethics Committee Erasmus  
55 MS (NL79921.078.21 and MEC-2021-0932). It is monitored by the regional Good Clinical Practice Unit. Data  
56 management must be approved according to national legislation. Furthermore, the trial has been registered in the  
57  
58  
59  
60

1  
2  
3  
4 European Union Drug Regulating Authorities Clinical Trials Database (EudraCT) (2021-000556-19) as well as on  
5 [www.clinicaltrials.gov](http://www.clinicaltrials.gov) (NCT05146700).  
6

7 Finally, a website ([www.traumox2.org](http://www.traumox2.org)) is available for further information and updates on the trial.  
8

9 Oxygen is a well-known drug given in a dosage of  $\text{FiO}_2$  0.21-1.0 and can be administered by paramedics, nurses, and  
10 doctors. The side-effects of normobaric oxygen-strategies include slightly decreased heart rate as well as increased  
11 risk of atelectasis, pleuritis and respiratory distress syndrome. The greater the  $\text{FiO}_2$ , the greater the risk. As the  
12 standard treatment of care currently includes high levels of  $\text{FiO}_2$ , it seems plausible that the intervention group will  
13 have a decreased risk for developing these side-effects.  
14  
15

16 On the other side, hypoxia is documented to be deleterious. To avoid the risk of hypoxia, all trial participants are  
17 monitored with continuous pulse oximetry (documented/registered every hour) and arterial blood gases to avoid  
18 desaturation. If the saturation is unmeasurable due to e.g. hypovolemia or hypothermia the treating physician will  
19 decide and document the treatment of choice. When measurable again, the allocated intervention will resume. In the  
20 TRAUMOX1 trial we observed seven episodes of desaturation ( $\text{SpO}_2$  below 90%) in the restrictive group (median 87%  
21 [87-89]). Of note, five of the seven cases of  $\text{SpO}_2$  below 89% occurred in two trial participants; one trial participant  
22 who had just been extubated and another trial participant who went into cardiac arrest for another reason than  
23 hypoxaemia.  
24  
25

26 The trial participants receiving the standard treatment and what is recommended in current trauma guidelines (liberal  
27 oxygen) are not put at any additional risk compared to patients not enrolled in the study. However, we suspect this  
28 standard treatment is not always beneficial. As outlined in the background section, we hypothesise that a liberal  
29 supplemental oxygen strategy may be harmful and should be avoided as soon as possible. Thus, the restrictive  
30 supplemental oxygen (intervention group) may be associated with fewer side effects, with no additional risk, as seen  
31 in other studies. Therefore, we believe that this study may be beneficial for the single trial participant.  
32  
33

34 Finally, there is no risk of delaying treatment due to enrolment, as the treating physician treats the trial participant as  
35 usual, until the randomisation result is available, and the allocation has begun.  
36 Therefore, we think that the study will add no risk for the included trial participants.  
37  
38  
39

#### 40 **Protocol changes**

41 Protocol changes can only be decided by the steering committee. All trial documents, including protocol amendments  
42 are available on the public TRAUMOX2 website and communicated to relevant parties when found appropriate.  
43  
44

#### 45 **Timeline of study progress**

46 Inclusion began December 7<sup>th</sup>, 2021 and is expected to be completed early 2024. Data analysis and manuscript  
47 drafting will commence autumn 2024. And thus, the submission of the primary paper is expected at the beginning of  
48 year 2025.  
49

#### 50 *Data monitoring and safety committee*

51 An independent data monitoring- and safety committee (DMSC) has been set up. The committee includes a  
52 statistician. The committee will meet when information on 30-day mortality has been collected in 355 (approximately  
53 25% of the sample size estimation) and 710 (approximately 50% of the sample size estimation) trial participants. Prior  
54 to the meeting, a statistician will perform an interim analysis with blinded data provided by the sponsor and principal  
55 investigator. Criteria for premature termination will be decided by the steering committee. Furthermore, the sponsor  
56  
57  
58  
59  
60

1  
2  
3  
4 has the responsibility to report the overall number of SAEs yearly to the DMSC. Detailed information on the DMSC is  
5 available on the study website.  
6

#### 7 **Publication Policy**

8  
9 The study results will be published in an appropriate international peer-reviewed scientific journal. Once the study  
10 results are published, it will be announced on the study website. The study is registered, and study results will be  
11 disclosed by the coordinating principal investigator in one or more public clinical study registry(ies), according to  
12 national/international use, including both positive, negative and inconclusive results. The registration will include a list  
13 of the investigational centres. The steering committee and the primary centre investigator (active) will be listed as co-  
14 authors in the publications. If the centre involves prehospital inclusion the prehospital centre investigator (active) will  
15 be co-author. Top-enrolling centres will be able to designate one additional co-author for every completely  
16 documented 100 trial participants. Blinded outcome assessors and the statistician doing the analyses can also qualify  
17 as co-authors. All authors must fulfil the criteria for authorship according to the ICMJE group. Each contributing centre  
18 can designate a reasonable number of active collaborators that participates in the study administration. These  
19 collaborators will be mentioned in the TRAUMOX2-study group and will be trackable via PubMed. In line with the  
20 principles of data preservation and sharing, the steering committee will, after publication of the overall dataset,  
21 consider all reasonable requests to make the dataset available in whole or part for secondary analyses and scientific  
22 publication. The steering committee will consider proposals for secondary analyses based on the scientific quality of  
23 the proposal. Proposals will need to be revised and approved by the steering committee prior to submission.  
24  
25  
26  
27

#### 28 **Archiving of Documents**

29  
30 The investigator will keep the subject's files and original data according to the local methods and facilities. The  
31 investigator will maintain the trial documents as specified in the ICH-GCP-Guideline for 10 years. The investigator/  
32 institution will take measures to prevent accidental or premature destruction of these documents.  
33

#### 34 **Patient and Public Involvement**

35  
36 Patients were not involved in the planning of this study. Trial participants will be given the opportunity to access the  
37 outcomes of the study once published.  
38  
39  
40  
41  
42  
43  
44  
45  
46  
47  
48  
49  
50  
51  
52  
53  
54  
55  
56  
57  
58  
59  
60

## Discussion

Oxygen has been used for centuries, but the evidence supporting its use remains sparse. The trauma population is particularly exposed to high concentrations of oxygen[1,3,4,10,32,33], although evidence for supplementary oxygen for the trauma population is extremely limited.[6,34] This is also evident in the newly updated guidelines on oxygen use in adults in the emergency setting published by the British Thoracic Society.[35] In trauma, they recommend initial management with high-concentration oxygen therapy and a target SpO<sub>2</sub> of 94–98% for both hypoxaemic patients and patients ‘at risk of hypoxaemia’. This, however, is a Grade D recommendation.

As mentioned in the introduction, a recently published meta-analysis in the *Lancet* concluded that clinicians should aim for a target SpO<sub>2</sub> of 94–96% in acutely ill patients.[8] Their analysis compared liberal versus conservative oxygen strategies and found increased rates of mortality for patients with SpO<sub>2</sub> above 96% compared to 94–96%. Of note, the trial sequential analysis in the meta-analysis was driven primarily by a single large randomised trial,[36] preventing the authors from excluding a small beneficial effect of liberal oxygen therapy. Furthermore, only one study on trauma patients was included.

Nonetheless, there is an increasing concern regarding the detrimental effects of hyperoxaemia, and thus targeting normoxaemia becomes appealing. However, the impact of pursuing normoxaemia on the prevalence of hypoxic episodes is unknown. Normoxia thus suddenly represents the fragile middle ground between two states of which we know one to be harmful and fear the other is too. However, in TRAUMOX1 maintenance of normoxaemia post trauma appeared feasible and there were few episodes of hypoxaemia.[20] Thus, TRAUMOX1 forms the basis of the current trial, TRAUMOX2, that aims to provide high-level evidence on the implications of supplemental oxygen.

In TRAUMOX2 the intervention is an SpO<sub>2</sub> target in the restrictive group and an FiO<sub>2</sub> target in the liberal group. Given the sigmoid shape of the oxygen dissociation curve, however, the PaO<sub>2</sub> resulting from a given FiO<sub>2</sub> and SpO<sub>2</sub> can vary greatly. Nevertheless, a trial must be feasible, and in the acute phase post trauma, careful titration of the PaO<sub>2</sub> is not feasible. A large retrospective study on 864,340 trauma patients found that trauma patients with and SpO<sub>2</sub>> 97% in the emergency department had a higher risk of in-hospital mortality if they received supplemental oxygen.[7] A large randomised study on patients with myocardial infarction showed that targeting an SpO<sub>2</sub> of 94% resulted in a decrease in myocardial injury and myocardial infarct size.[37] Another study has shown a dramatic increase in the occurrence of hyperoxaemia when SpO<sub>2</sub> was above 95%,[38] and for those reasons, we have chosen SpO<sub>2</sub> 94% to be the target in the restrictive group. The SpO<sub>2</sub> is recorded once every hour during the intervention and aims to represent the median SpO<sub>2</sub> during that hour. If multiple measurements are available, e.g. in the ICU, the median is calculated. It could be argued that continuous measurements, e.g. an SpO<sub>2</sub> every minute, would be favourable. However, the trial aims to be pragmatic, and everyday care in the general ward does not allow for careful titration of the SpO<sub>2</sub> more than once an hour.

Furthermore, the FiO<sub>2</sub> target in the liberal group is based on a guideline where oxygen is recommended for all trauma patients.[1] However, the recommendation is without a specific therapeutic goal. In TRAUMOX1, however, some clinicians were concerned about the concentration and duration of oxygen in the liberal group. Therefore, the concentration may be diminished to 60% or 12 L O<sub>2</sub>/min on a non-rebreather mask once the trial participant reaches the OR, ICU, post-anaesthesia care unit or ward if the saturation is at least 98%.

In a retrospective study of intubated trauma patients we found that the FiO<sub>2</sub> seemed to be high in the first hours after trauma followed by a steady decline until a stable plateau of approximately 30 - 40% after 10-12 hours was reached.[39] Furthermore, in a randomised trial, administration of 80% compared with 30% oxygen in the perioperative period (median time with intervention= 5.5 hours) was associated with significantly increased long-term mortality.[40] Therefore, the duration of the intervention altogether has been diminished from 24 hours to eight hours to ensure to represent only the most acute phase post trauma until careful oxygen titration becomes possible.

It should be acknowledged that oxygen delivered to the tissues is dependent on numerous factors which are not directly accounted for in this trial, such as cardiac output and haemoglobin levels. In addition, some patients may have



1  
2  
3  
4 pulmonary dysfunction with impaired oxygenation, for instance after chest trauma. The data collected in our pragmatic  
5 study will not allow a detailed analysis of all these factors, but haemoglobin levels and the presence of chest trauma  
6 are registered. The impact of both could subsequently be explored.  
7

8  
9 In TRAUMOX1 the median time from trauma to arrival in the trauma bay was 51 [29-68] minutes. In larger, more  
10 geographically challenging countries, however, this time gap may be much larger, and therefore prehospital inclusion  
11 is aimed for whenever possible in TRAUMOX2 to diminish time in the acute phase without any allocated intervention  
12 begun.  
13

14 The primary outcome of the trial is the incidence of pulmonary complications and/or death within 30 days (combined  
15 outcome). This is done to increase the event rate, but also because both outcomes are very important to the trauma  
16 patient: the majority of trauma patients are free from co-morbidities and independent prior to their trauma,[41,42]  
17 but still each year 5.8 million people die as a result of trauma.[43] Furthermore, the incidence of pneumonia in  
18 trauma patients has been reported to be as high as 26-44% leading to disability and prolonged hospital stay.[44,45]  
19 Furthermore, trauma constitutes a major economic burden, as trauma-related costs were estimated to \$671 billion in  
20 the United States alone in 2013.[46] Understanding whether supplemental oxygen plays a role in the outcome for the  
21 trauma patient is thus of utmost importance.  
22  
23  
24  
25  
26  
27  
28  
29  
30  
31  
32  
33  
34  
35  
36  
37  
38  
39  
40  
41  
42  
43  
44  
45  
46  
47  
48  
49  
50  
51  
52  
53  
54  
55  
56  
57  
58  
59  
60

1  
2  
3  
4 *Figure 1 – Timeline of patients randomised to either liberal or restrictive oxygen approach from trauma to end of*  
5 *follow-up*  
6

7 *Figure 2 – Pneumonia and ARDS (Acute Respiratory Distress) definitions*  
8  
9  
10  
11  
12  
13  
14  
15  
16  
17  
18  
19  
20  
21  
22  
23  
24  
25  
26  
27  
28  
29  
30  
31  
32  
33  
34  
35  
36  
37  
38  
39  
40  
41  
42  
43  
44  
45  
46  
47  
48  
49  
50  
51  
52  
53  
54  
55  
56  
57  
58  
59  
60

For peer review only

1  
2  
3  
4  
5  
6  
7  
8  
9  
10  
11  
12  
13  
14  
15  
16  
17  
18  
19  
20  
21  
22  
23  
24  
25  
26  
27  
28  
29  
30  
31  
32  
33  
34  
35  
36  
37  
38  
39  
40  
41  
42  
43  
44  
45  
46  
47  
48  
49  
50  
51  
52  
53  
54  
55  
56  
57  
58  
59  
60**Funding**

TRAUMOX2 is initiated by a research group of medical doctors in “Department of Anaesthesia and Trauma Centre, Centre of Head and Orthopaedics, Rigshospitalet, Denmark “. The work presented in this article is supported by Novo Nordisk Foundation grant NNF20OC0063985. In addition, the study is supported by The Lundbeck Foundation through a personal grant to author JB. Drug expenses are covered by the participating centres’ departmental budget. Drug expenses beyond the normal department budget is also be covered by the participating centres.

For peer review only

**Authors contribution**

**JB:** Substantial contributions to the conception and design of the work as well as the acquisition, analysis, and interpretation of data for the work; AND  
Drafting the work; AND

Final approval of the version to be published; AND

Agreement to be accountable for all aspects of the work in ensuring that questions related to the accuracy or integrity of any part of the work are appropriately investigated and resolved.

**TA:** Substantial contributions to the conception and design of the work as well as the acquisition, analysis, and interpretation of data for the work; AND

Drafting the work; AND

Final approval of the version to be published; AND

Agreement to be accountable for all aspects of the work in ensuring that questions related to the accuracy or integrity of any part of the work are appropriately investigated and resolved.

**VS:** Substantial contributions to the conception and design of the work as well as the acquisition, analysis, and interpretation of data for the work; AND

Drafting the work; AND

Final approval of the version to be published; AND

Agreement to be accountable for all aspects of the work in ensuring that questions related to the accuracy or integrity of any part of the work are appropriately investigated and resolved.

**JH:** Substantial contributions to the conception, analysis and interpretation of data for the work; AND

Revising it critically for important intellectual content; AND

Final approval of the version to be published; AND

Agreement to be accountable for all aspects of the work in ensuring that questions related to the accuracy or integrity of any part of the work are appropriately investigated and resolved.

**SY:** Substantial contributions to the conception, analysis and interpretation of data for the work; AND

Revising it critically for important intellectual content; AND

Final approval of the version to be published; AND

Agreement to be accountable for all aspects of the work in ensuring that questions related to the accuracy or integrity of any part of the work are appropriately investigated and resolved.

**MK:** Substantial contributions to the conception, analysis and interpretation of data for the work; AND

Revising it critically for important intellectual content; AND

Final approval of the version to be published; AND

Agreement to be accountable for all aspects of the work in ensuring that questions related to the accuracy or integrity of any part of the work are appropriately investigated and resolved.

**MVV:** Substantial contributions to the conception, analysis and interpretation of data for the work; AND

Revising it critically for important intellectual content; AND

Final approval of the version to be published; AND

Agreement to be accountable for all aspects of the work in ensuring that questions related to the accuracy or integrity of any part of the work are appropriately investigated and resolved.

**EVL:** Substantial contributions to the conception, analysis and interpretation of data for the work; AND

Revising it critically for important intellectual content; AND

Final approval of the version to be published; AND

1  
2  
3  
4 Agreement to be accountable for all aspects of the work in ensuring that questions related to the accuracy or integrity  
5 of any part of the work are appropriately investigated and resolved.  
6

7 **SM:** Substantial contributions to the conception, analysis and interpretation of data for the work; AND

8 Revising it critically for important intellectual content; AND

9 Final approval of the version to be published; AND

10 Agreement to be accountable for all aspects of the work in ensuring that questions related to the accuracy or integrity  
11 of any part of the work are appropriately investigated and resolved.  
12

13  
14 **STZ:** Substantial contributions to the conception, analysis and interpretation of data for the work; AND

15 Revising it critically for important intellectual content; AND

16 Final approval of the version to be published; AND

17 Agreement to be accountable for all aspects of the work in ensuring that questions related to the accuracy or integrity  
18 of any part of the work are appropriately investigated and resolved.  
19

20  
21 **MAS:** Substantial contributions to the conception, analysis and interpretation of data for the work; AND

22 Revising it critically for important intellectual content; AND

23 Final approval of the version to be published; AND

24 Agreement to be accountable for all aspects of the work in ensuring that questions related to the accuracy or integrity  
25 of any part of the work are appropriately investigated and resolved.  
26

27  
28 **CFE:** Substantial contributions to the conception, analysis and interpretation of data for the work; AND

29 Revising it critically for important intellectual content; AND

30 Final approval of the version to be published; AND

31 Agreement to be accountable for all aspects of the work in ensuring that questions related to the accuracy or integrity  
32 of any part of the work are appropriately investigated and resolved.  
33

34  
35 **DLI:** Substantial contributions to the conception and design of the work as well as the acquisition, analysis, and  
36 interpretation of data for the work; AND

37 Drafting the work; AND

38 Final approval of the version to be published; AND

39 Agreement to be accountable for all aspects of the work in ensuring that questions related to the accuracy or integrity  
40 of any part of the work are appropriately investigated and resolved.  
41

42  
43 **LSR:** Substantial contributions to the conception and design of the work as well as the acquisition, analysis, and  
44 interpretation of data for the work; AND

45 Drafting the work; AND

46 Final approval of the version to be published; AND

47 Agreement to be accountable for all aspects of the work in ensuring that questions related to the accuracy or integrity  
48 of any part of the work are appropriately investigated and resolved.  
49

50  
51 **JS:** Substantial contributions to the conception and design of the work as well as the acquisition, analysis, and  
52 interpretation of data for the work; AND

53 Drafting the work; AND

54 Final approval of the version to be published; AND

55 Agreement to be accountable for all aspects of the work in ensuring that questions related to the accuracy or integrity  
56 of any part of the work are appropriately investigated and resolved.  
57  
58  
59  
60

1  
2  
3  
4  
5  
6  
7  
8  
9  
10  
11  
12  
13  
14  
15  
16  
17  
18  
19  
20  
21  
22  
23  
24  
25  
26  
27  
28  
29  
30  
31  
32  
33  
34  
35  
36  
37  
38  
39  
40  
41  
42  
43  
44  
45  
46  
47  
48  
49  
50  
51  
52  
53  
54  
55  
56  
57  
58  
59  
60

**Conflicts of interest:** None

For peer review only

## REFERENCES

- 1 American College of Surgeons. *ATLS: Advanced Trauma Life Support for Doctors (Student Course Manual)*, 10th edition.
- 2 Hale KE, Gavin C, O'Driscoll BR. Audit of oxygen use in emergency ambulances and in a hospital emergency department. *Emerg Med J* 2008;**25**:773–6. doi:10.1136/emj.2008.059287
- 3 McMullan J, Rodriquez D, Hart KW, *et al*. Prevalence of prehospital hypoxemia and oxygen use in trauma patients. *Mil Med* 2013;**178**:1121–5. doi:10.7205/MILMED-D-13-00126
- 4 Leitch P, Hudson AL, Griggs JE, *et al*. Incidence of hyperoxia in trauma patients receiving pre-hospital emergency anaesthesia: results of a 5-year retrospective analysis. *Scand J Trauma Resusc Emerg Med* 2021;**29**:134. doi:10.1186/s13049-021-00951-w
- 5 Boyle M, Wong J. Prescribing oxygen therapy. An audit of oxygen prescribing practices on medical wards at North Shore Hospital, Auckland, New Zealand. *N Z Med J* 2006;**119**:U2080.
- 6 Eskesen TG, Baekgaard JS, Steinmetz J, *et al*. Initial use of supplementary oxygen for trauma patients: a systematic review. *BMJ Open* 2018;**8**:e020880. doi:10.1136/bmjopen-2017-020880
- 7 Christensen MA, Steinmetz J, Velmahos G, *et al*. Supplemental oxygen therapy in trauma patients: An exploratory registry-based study. *Acta Anaesthesiol Scand* 2021;**65**:967–78. doi:10.1111/aas.13829
- 8 Chu DK, Kim LH-Y, Young PJ, *et al*. Mortality and morbidity in acutely ill adults treated with liberal versus conservative oxygen therapy (IOTA): a systematic review and meta-analysis. *Lancet Lond Engl* 2018;**391**:1693–705. doi:10.1016/S0140-6736(18)30479-3
- 9 Taher A, Pilehvari Z, Poorolajal J, *et al*. Effects of Normobaric Hyperoxia in Traumatic Brain Injury: A Randomized Controlled Clinical Trial. *Trauma Mon* 2016;**21**:e26772. doi:10.5812/traumamon.26772
- 10 Eskesen TG, Baekgaard JS, Christensen RE, *et al*. Supplemental oxygen and hyperoxemia in trauma patients: A prospective, observational study. *Acta Anaesthesiol Scand* Published Online First: 6 December 2018. doi:10.1111/aas.13301
- 11 Suzuki S, Eastwood GM, Peck L, *et al*. Current oxygen management in mechanically ventilated patients: a prospective observational cohort study. *J Crit Care* 2013;**28**:647–54. doi:10.1016/j.jcrrc.2013.03.010
- 12 Helmerhorst HJF, Schultz MJ, van der Voort PHJ, *et al*. Effectiveness and Clinical Outcomes of a Two-Step Implementation of Conservative Oxygenation Targets in Critically Ill Patients: A Before and After Trial. *Crit Care Med* 2016;**44**:554–63. doi:10.1097/CCM.0000000000001461
- 13 Staehr-Rye AK, Meyhoff CS, Scheffenbichler FT, *et al*. High intraoperative inspiratory oxygen fraction and risk of major respiratory complications. *BJA Br J Anaesth* 2017;**119**:140–9. doi:10.1093/bja/aex128
- 14 Six S, Jaffal K, Ledoux G, *et al*. Hyperoxemia as a risk factor for ventilator-associated pneumonia. *Crit Care Lond Engl* 2016;**20**:195. doi:10.1186/s13054-016-1368-4
- 15 Allegranzi B, Zayed B, Bischoff P, *et al*. New WHO recommendations on intraoperative and postoperative measures for surgical site infection prevention: an evidence-based global perspective. *Lancet Infect Dis* 2016;**16**:e288–303. doi:10.1016/S1473-3099(16)30402-9
- 16 Meyhoff CS, Wetterslev J, Jorgensen LN, *et al*. Effect of high perioperative oxygen fraction on surgical site infection and pulmonary complications after abdominal surgery: the PROXI randomized clinical trial. *JAMA* 2009;**302**:1543–50. doi:10.1001/jama.2009.1452

- 1  
2  
3  
4 17 Eastwood G, Bellomo R, Bailey M, *et al*. Arterial oxygen tension and mortality in mechanically ventilated patients. *Intensive Care Med* 2012;**38**:91–8. doi:10.1007/s00134-011-2419-6
- 5  
6  
7 18 Helmerhorst HJF, Arts DL, Schultz MJ, *et al*. Metrics of Arterial Hyperoxia and Associated Outcomes in Critical Care. *Crit Care Med* 2017;**45**:187–95. doi:10.1097/CCM.0000000000002084
- 8  
9  
10 19 Schjørring OL, Klitgaard TL, Perner A, *et al*. Lower or Higher Oxygenation Targets for Acute Hypoxemic Respiratory Failure. *N Engl J Med* Published Online First: 20 January 2021. doi:10.1056/NEJMoa2032510
- 11  
12  
13 20 Baekgaard JS, Isbye D, Ottosen CI, *et al*. Restrictive vs liberal oxygen for trauma patients-the TRAUMOX1 pilot randomised clinical trial. *Acta Anaesthesiol Scand*; **63**:947–55. doi:10.1111/aas.13362
- 14  
15  
16 21 Chan A-W, Tetzlaff JM, Altman DG, *et al*. SPIRIT 2013 statement: defining standard protocol items for clinical trials. *Ann Intern Med* 2013;**158**:200–7. doi:10.7326/0003-4819-158-3-201302050-00583
- 17  
18  
19 22 Xu RH, Keetharuth AD, Wang L-L, *et al*. Measuring health-related quality of life and well-being: a head-to-head psychometric comparison of the EQ-5D-5L, ReQoL-UI and ICECAP-A. *Eur J Health Econ HEPAC Health Econ Prev Care* 2022;**23**:165–76. doi:10.1007/s10198-021-01359-0
- 20  
21  
22 23 Wilson JT, Pettigrew LE, Teasdale GM. Structured interviews for the Glasgow Outcome Scale and the extended Glasgow Outcome Scale: guidelines for their use. *J Neurotrauma* 1998;**15**:573–85. doi:10.1089/neu.1998.15.573
- 23  
24  
25 24 Harris PA, Taylor R, Thielke R, *et al*. Research electronic data capture (REDCap)—A metadata-driven methodology and workflow process for providing translational research informatics support. *J Biomed Inform* 2009;**42**:377–81. doi:10.1016/j.jbi.2008.08.010
- 26  
27  
28 25 Pneumonia (Ventilator-associated [VAP] and non-ventilator-associated Pneumonia [PNEU]) Event. <https://www.cdc.gov/nhsn/pdfs/pscmanual/6pscvapcurrent.pdf>
- 29  
30  
31 26 ARDS Definition Task Force, Ranieri VM, Rubenfeld GD, *et al*. Acute respiratory distress syndrome: the Berlin Definition. *JAMA* 2012;**307**:2526–33. doi:10.1001/jama.2012.5669
- 32  
33  
34 27 Savitsky B, Givon A, Rozenfeld M, *et al*. Traumatic brain injury: It is all about definition. *Brain Inj* 2016;**30**:1194–200. doi:10.1080/02699052.2016.1187290
- 35  
36  
37 28 Demetriades D, Murray J, Charalambides K, *et al*. Trauma fatalities: time and location of hospital deaths. *J Am Coll Surg* 2004;**198**:20–6. doi:10.1016/j.jamcollsurg.2003.09.003
- 38  
39  
40 29 Mallinckrodt CH, Lin Q, Molenberghs M. A structured framework for assessing sensitivity to missing data assumptions in longitudinal clinical trials. *Pharm Stat* 2013;**12**:1–6. doi:10.1002/pst.1547
- 41  
42  
43 30 Cook D, Lauzier F, Rocha MG, *et al*. Serious adverse events in academic critical care research. *CMAJ Can Med Assoc J J Assoc Medicale Can* 2008;**178**:1181–4. doi:10.1503/cmaj.071366
- 44  
45  
46 31 WMA - The World Medical Association-WMA Declaration of Helsinki – Ethical Principles for Medical Research Involving Human Subjects. <https://www.wma.net/policies-post/wma-declaration-of-helsinki-ethical-principles-for-medical-research-involving-human-subjects/> (accessed 25 Jan 2022).
- 47  
48  
49 32 Mosby. *PHTLS. Basic and Advanced Prehospital Trauma Life Support*. 5 edn.
- 50  
51  
52 33 Stockinger ZT, Mcswain NE. Prehospital supplemental oxygen in trauma patients: its efficacy and implications for military medical care. *Mil Med* 2004;**169**:609–12. doi:10.7205/milmed.169.8.609
- 53  
54  
55 34 Hansen TE, Christensen RE, Baekgaard J, *et al*. Supplemental oxygen for traumatic brain injury: A systematic review. *Acta Anaesthesiol Scand* Published Online First: 14 December 2021. doi:10.1111/aas.14019
- 56  
57  
58  
59  
60



- 1  
2  
3  
4 35 O'Driscoll BR, Howard LS, Earis J, *et al.* BTS guideline for oxygen use in adults in healthcare and emergency  
5 settings. *Thorax* 2017;**72**:ii1–90. doi:10.1136/thoraxjnl-2016-209729  
6
- 7 36 Roffe C, Nevatte T, Sim J, *et al.* Effect of Routine Low-Dose Oxygen Supplementation on Death and Disability in  
8 Adults With Acute Stroke: The Stroke Oxygen Study Randomized Clinical Trial. *JAMA* 2017;**318**:1125–35.  
9 doi:10.1001/jama.2017.11463  
10
- 11 37 Stub Dion, Smith Karen, Bernard Stephen, *et al.* Air Versus Oxygen in ST-Segment–Elevation Myocardial  
12 Infarction. *Circulation* 2015;**131**:2143–50. doi:10.1161/CIRCULATIONAHA.114.014494  
13
- 14 38 Durlinger EMJ, Spoelstra-de Man AME, Smit B, *et al.* Hyperoxia: At what level of SpO<sub>2</sub> is a patient safe? A study in  
15 mechanically ventilated ICU patients. *J Crit Care* 2017;**39**:199–204. doi:10.1016/j.jcrc.2017.02.031  
16
- 17 39 Baekgaard J, Siersma V, Christensen RE, *et al.* A high fraction of inspired oxygen may increase mortality in  
18 intubated trauma patients - A retrospective cohort study. *Injury* 2022;**53**:190–7. doi:10.1016/j.injury.2021.09.015  
19
- 20 40 Meyhoff CS, Jorgensen LN, Wetterslev J, *et al.* Increased long-term mortality after a high perioperative inspiratory  
21 oxygen fraction during abdominal surgery: follow-up of a randomized clinical trial. *Anesth Analg* 2012;**115**:849–  
22 54. doi:10.1213/ANE.0b013e3182652a51  
23
- 24 41 Dijkink S, Krijnen P, Hage A, *et al.* Differences in Characteristics and Outcome of Patients with Penetrating Injuries  
25 in the USA and the Netherlands: A Multi-institutional Comparison. *World J Surg* 2018;**42**:3608–15.  
26 doi:10.1007/s00268-018-4669-8  
27
- 28 42 Rincon F, Kang J, Vibbert M, *et al.* Significance of arterial hyperoxia and relationship with case fatality in traumatic  
29 brain injury: a multicentre cohort study. *J Neurol Neurosurg Psychiatry* 2014;**85**:799–805. doi:10.1136/jnnp-2013-  
30 305505  
31
- 32 43 WHO | Injuries and violence: the facts. [http://www.who.int/violence\\_injury\\_prevention/key\\_facts/en/](http://www.who.int/violence_injury_prevention/key_facts/en/) (accessed  
33 11 Aug 2017).  
34
- 35 44 Hyllienmark P, Brattström O, Larsson E, *et al.* High incidence of post-injury pneumonia in intensive care-treated  
36 trauma patients. *Acta Anaesthesiol Scand* 2013;**57**:848–54. doi:10.1111/aas.12111  
37
- 38 45 Rodriguez JL, Gibbons KJ, Bitzer LG, *et al.* Pneumonia: incidence, risk factors, and outcome in injured patients. *J*  
39 *Trauma* 1991;**31**:907–12; discussion 912-914.  
40
- 41 46 Cost of Injury & Calculators | WISQARS | Injury Center | CDC.  
42 2018.<https://www.cdc.gov/injury/wisqars/cost/index.html> (accessed 10 May 2019).  
43  
44  
45  
46  
47  
48  
49  
50  
51  
52  
53  
54  
55  
56  
57  
58  
59  
60

1  
2  
3  
4  
5  
6  
7  
8  
9  
10  
11  
12  
13  
14  
15  
16  
17  
18  
19  
20  
21  
22  
23  
24  
25  
26  
27  
28  
29  
30  
31  
32  
33  
34  
35  
36  
37  
38  
39  
40  
41

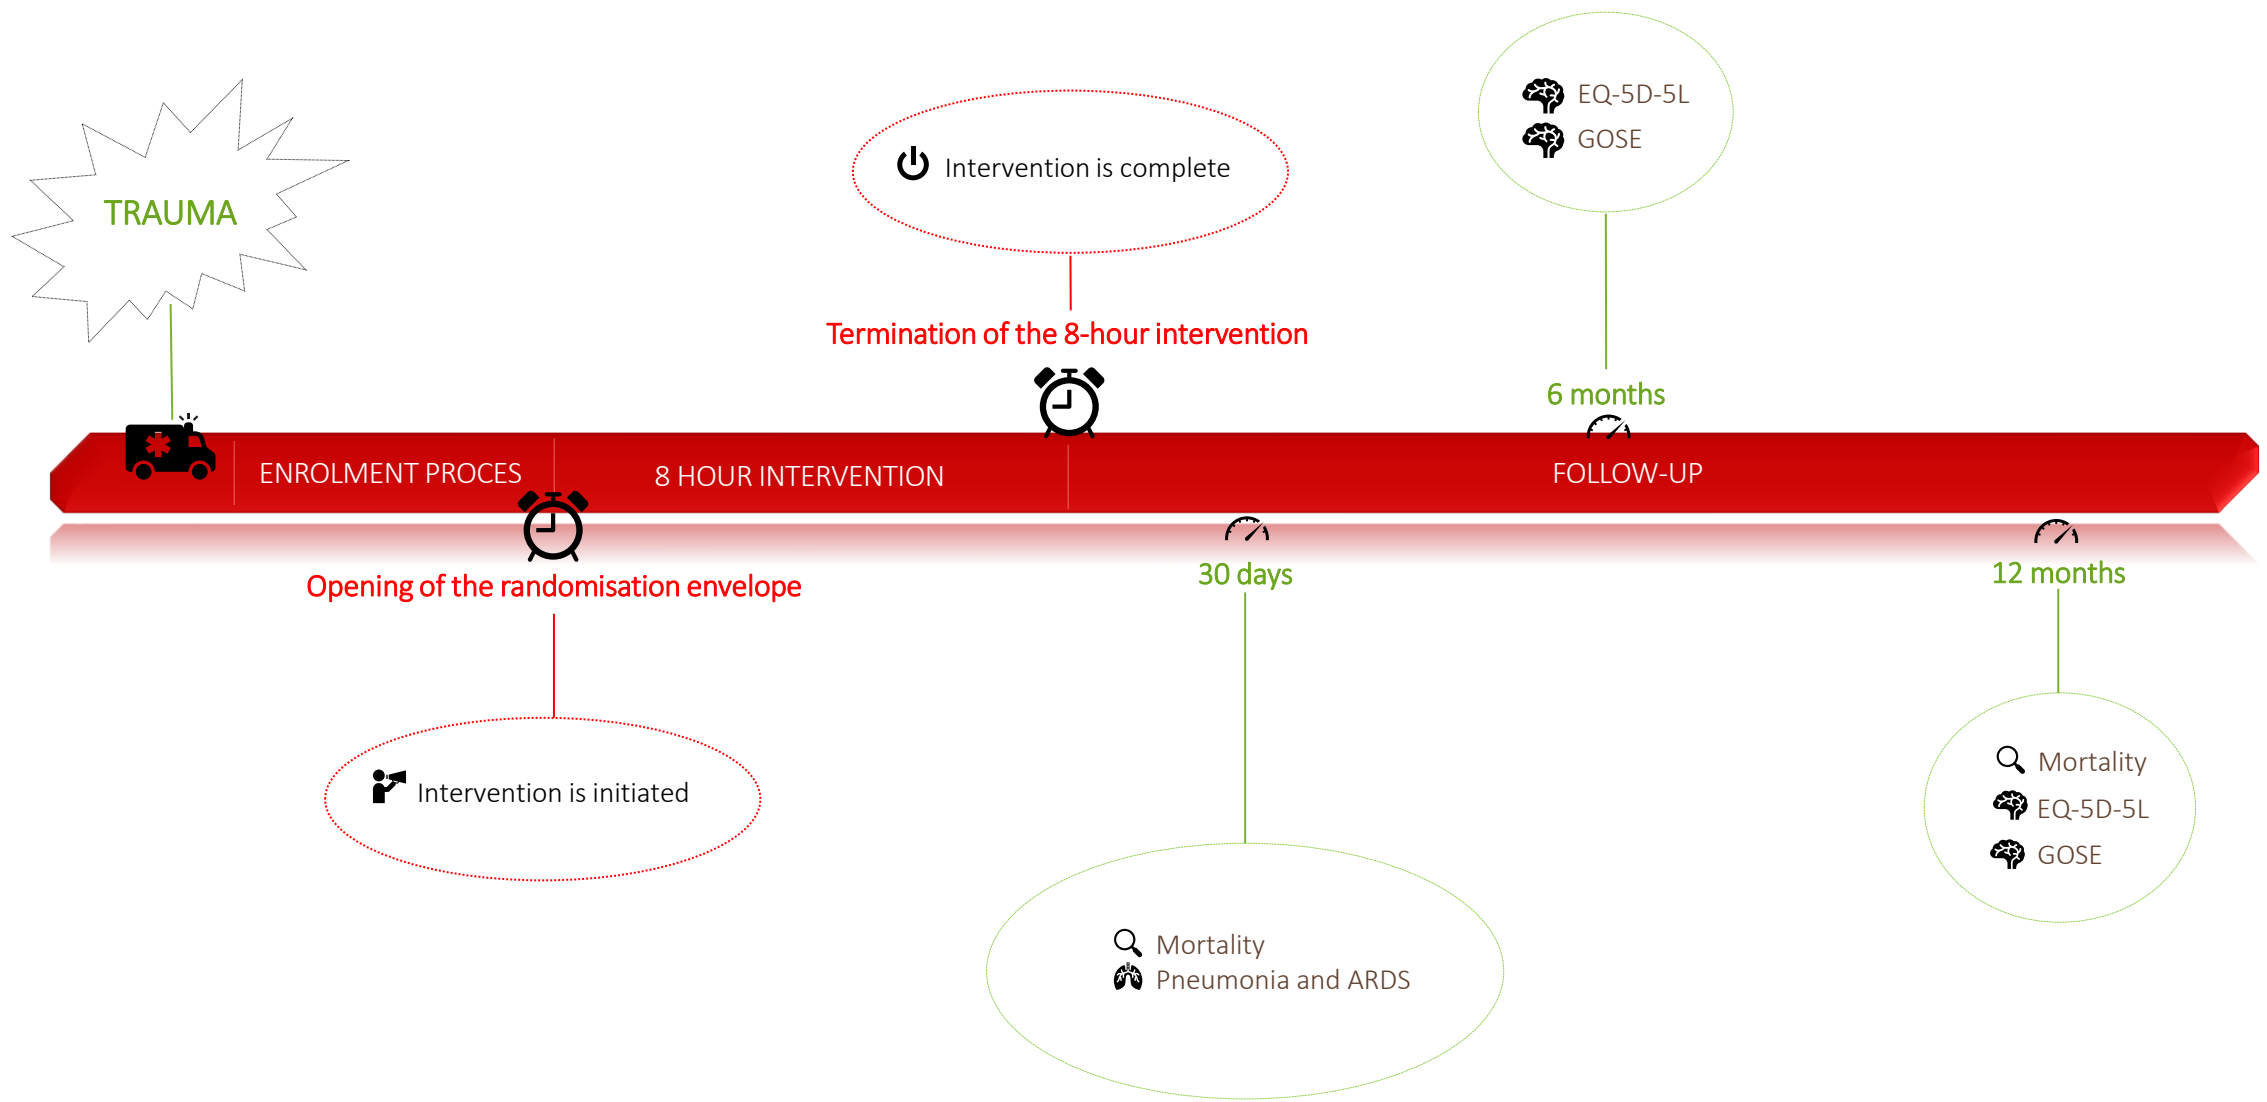

|                                                                                                                                                                                                                                            |                                                                                                                                                                                                                                                                                                                                                                                                                                                                                                                                                                                                                                                                                                                                                                                                                                                                                                                                                                                                                                                                                                                                                                                                                                                                                                                                                                                                                                                                                                                                 |
|--------------------------------------------------------------------------------------------------------------------------------------------------------------------------------------------------------------------------------------------|---------------------------------------------------------------------------------------------------------------------------------------------------------------------------------------------------------------------------------------------------------------------------------------------------------------------------------------------------------------------------------------------------------------------------------------------------------------------------------------------------------------------------------------------------------------------------------------------------------------------------------------------------------------------------------------------------------------------------------------------------------------------------------------------------------------------------------------------------------------------------------------------------------------------------------------------------------------------------------------------------------------------------------------------------------------------------------------------------------------------------------------------------------------------------------------------------------------------------------------------------------------------------------------------------------------------------------------------------------------------------------------------------------------------------------------------------------------------------------------------------------------------------------|
| <p>1<br/>2<br/>3<br/>4<br/>5<br/>6<br/>7<br/>8<br/>9<br/>10<br/>11<br/>12<br/>13<br/>14<br/>15<br/>16<br/>17<br/>18<br/>19<br/>20<br/>21<br/>22<br/>23<br/>24<br/>25<br/>26<br/>27<br/>28<br/>29<br/>30<br/>31</p> <p><b>Pneumonia</b></p> | <p>Two or more serial chest imaging test results with at least one of the following:</p> <ul style="list-style-type: none"> <li>- New and persistent OR progressive and persistent infiltrate/consolidation/cavitation</li> </ul> <p>Symptoms/laboratory:</p> <p>At least one of the following:</p> <ul style="list-style-type: none"> <li>- Temperature <math>\geq 38,5^{\circ}\text{C}</math></li> <li>- Leukopenia (<math>\leq 4000 \text{ WBC}/\text{mm}^3</math>) or leukocytosis (<math>&gt;12,000 \text{ WBC}/\text{mm}^3</math>)</li> <li>- For adults <math>&gt;70</math> years old, altered mental status with no other recognized cause</li> </ul> <p>And at least two of the following:</p> <ul style="list-style-type: none"> <li>- New onset of purulent sputum or change in character of sputum, or increased respiratory secretions, or increased suctioning requirements</li> <li>- New onset or worsening cough, or dyspnea, or tachypnea</li> <li>- Rales or bronchial breath sounds</li> <li>- Worsening gas exchange (e.g., <math>\text{O}_2</math> desaturations (e.g., <math>\text{PaO}_2/\text{FiO}_2 &lt; 240 \text{ mmHg}</math>) increased oxygen requirements, or increased ventilator demand)</li> </ul> <p>Ventilator-associated pneumonia (VAP): A pneumonia where the patient is on mechanical ventilation for <math>&gt;2</math> calendar days on the date of event, with day of ventilator placement being Day 1, AND the ventilator was in place on the date of event or the day before.</p> |
| <p>32<br/>33<br/>34<br/>35<br/>36<br/>37<br/>38<br/>39<br/>40<br/>41<br/>42<br/>43<br/>44<br/>45<br/>46<br/>47<br/>48<br/>49<br/>50<br/>51<br/>52<br/>53<br/>54<br/>55<br/>56<br/>57<br/>58<br/>59<br/>60</p> <p><b>ARDS</b></p>           | <p>Berlin definition:</p> <p><i>Acute diffuse, inflammatory lung injury, leading to increased pulmonary vascular permeability, increased lung weight, and loss of aerated lung tissue...[with] hypoexemia and bilateral radiographic opacities associated with increased venous admixture, increased physiological dead space and decreased lung compliance.</i></p> <ol style="list-style-type: none"> <li>1. <i>acute, meaning onset over 1 week or less</i></li> <li>2. <i>bilateral opacities consistent with pulmonary edema must be present and may be detected on CT or chest radiograph</i></li> <li>3. <i>Oxygenation difficulties are classified as mild, moderate or severe ARDS:</i><br/> <i>mild: <math>200 \text{ mmHg} &lt; \text{PaO}_2/\text{FiO}_2 \leq 300 \text{ mHg}</math> with <math>\text{PEEP}/\text{CPAP} \geq 5 \text{ cm H}_2\text{O}</math></i><br/> <i>moderate: <math>100 \text{ mmHg} &lt; \text{PaO}_2/\text{FiO}_2 \leq 200 \text{ mHg}</math> with <math>\text{PEEP} \geq 5 \text{ cm H}_2\text{O}</math></i><br/> <i>severe: <math>\text{PaO}_2/\text{FiO}_2 \leq 100 \text{ mHg}</math> with <math>\text{PEEP} \geq 5 \text{ cm H}_2\text{O}</math></i></li> </ol>                                                                                                                                                                                                                                                                                                                         |

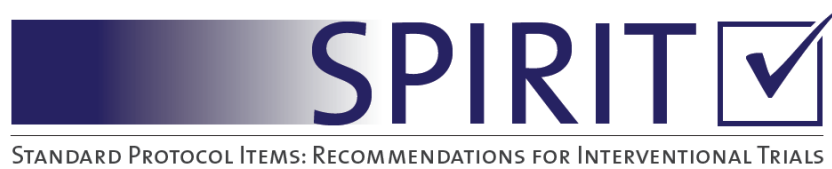

SPIRIT 2013 Checklist: Recommended items to address in a clinical trial protocol and related documents\*

| Section/item                      | Item No | Description                                                                                                                                                                                                                                                                              |
|-----------------------------------|---------|------------------------------------------------------------------------------------------------------------------------------------------------------------------------------------------------------------------------------------------------------------------------------------------|
| <b>Administrative information</b> |         |                                                                                                                                                                                                                                                                                          |
| Title                             | ✓ 1     | Descriptive title identifying the study design, population, interventions, and, if applicable, trial acronym                                                                                                                                                                             |
| Trial registration                | ✓ 2a    | Trial identifier and registry name. If not yet registered, name of intended registry                                                                                                                                                                                                     |
|                                   | ✓ 2b    | All items from the World Health Organization Trial Registration Data Set                                                                                                                                                                                                                 |
| Protocol version                  | ✓ 3     | Date and version identifier                                                                                                                                                                                                                                                              |
| Funding                           | ✓ 4     | Sources and types of financial, material, and other support                                                                                                                                                                                                                              |
| Roles and responsibilities        | ✓ 5a    | Names, affiliations, and roles of protocol contributors                                                                                                                                                                                                                                  |
|                                   | ✓ 5b    | Name and contact information for the trial sponsor                                                                                                                                                                                                                                       |
|                                   | ✓ 5c    | Role of study sponsor and funders, if any, in study design; collection, management, analysis, and interpretation of data; writing of the report; and the decision to submit the report for publication, including whether they will have ultimate authority over any of these activities |
|                                   | ✓ 5d    | Composition, roles, and responsibilities of the coordinating centre, steering committee, endpoint adjudication committee, data management team, and other individuals or groups overseeing the trial, if applicable (see Item 21a for data monitoring committee)                         |
| <b>Introduction</b>               |         |                                                                                                                                                                                                                                                                                          |
| Background and rationale          | ✓ 6a    | Description of research question and justification for undertaking the trial, including summary of relevant studies (published and unpublished) examining benefits and harms for each intervention                                                                                       |
|                                   | ✓ 6b    | Explanation for choice of comparators                                                                                                                                                                                                                                                    |
| Objectives                        | ✓ 7     | Specific objectives or hypotheses                                                                                                                                                                                                                                                        |
| Trial design                      | ✓ 8     | Description of trial design including type of trial (eg, parallel group, crossover, factorial, single group), allocation ratio, and framework (eg, superiority, equivalence, noninferiority, exploratory)                                                                                |

## Methods: Participants, interventions, and outcomes

|                      |       |                                                                                                                                                                                                                                                                                                                                                                                |
|----------------------|-------|--------------------------------------------------------------------------------------------------------------------------------------------------------------------------------------------------------------------------------------------------------------------------------------------------------------------------------------------------------------------------------|
| Study setting        | ✓ 9   | Description of study settings (eg, community clinic, academic hospital) and list of countries where data will be collected. Reference to where list of study sites can be obtained                                                                                                                                                                                             |
| Eligibility criteria | ✓ 10  | Inclusion and exclusion criteria for participants. If applicable, eligibility criteria for study centres and individuals who will perform the interventions (eg, surgeons, psychotherapists)                                                                                                                                                                                   |
| Interventions        | ✓ 11a | Interventions for each group with sufficient detail to allow replication, including how and when they will be administered                                                                                                                                                                                                                                                     |
|                      | ✓ 11b | Criteria for discontinuing or modifying allocated interventions for a given trial participant (eg, drug dose change in response to harms, participant request, or improving/worsening disease)                                                                                                                                                                                 |
|                      | ✓ 11c | Strategies to improve adherence to intervention protocols, and any procedures for monitoring adherence (eg, drug tablet return, laboratory tests)                                                                                                                                                                                                                              |
|                      | ✓ 11d | Relevant concomitant care and interventions that are permitted or prohibited during the trial                                                                                                                                                                                                                                                                                  |
| Outcomes             | ✓ 12  | Primary, secondary, and other outcomes, including the specific measurement variable (eg, systolic blood pressure), analysis metric (eg, change from baseline, final value, time to event), method of aggregation (eg, median, proportion), and time point for each outcome. Explanation of the clinical relevance of chosen efficacy and harm outcomes is strongly recommended |
| Participant timeline | ✓ 13  | Time schedule of enrolment, interventions (including any run-ins and washouts), assessments, and visits for participants. A schematic diagram is highly recommended (see Figure)                                                                                                                                                                                               |
| Sample size          | ✓ 14  | Estimated number of participants needed to achieve study objectives and how it was determined, including clinical and statistical assumptions supporting any sample size calculations                                                                                                                                                                                          |
| Recruitment          | ✓ 15  | Strategies for achieving adequate participant enrolment to reach target sample size                                                                                                                                                                                                                                                                                            |

## Methods: Assignment of interventions (for controlled trials)

### Allocation:

|                     |       |                                                                                                                                                                                                                                                                                                                                                          |
|---------------------|-------|----------------------------------------------------------------------------------------------------------------------------------------------------------------------------------------------------------------------------------------------------------------------------------------------------------------------------------------------------------|
| Sequence generation | ✓ 16a | Method of generating the allocation sequence (eg, computer-generated random numbers), and list of any factors for stratification. To reduce predictability of a random sequence, details of any planned restriction (eg, blocking) should be provided in a separate document that is unavailable to those who enrol participants or assign interventions |
|---------------------|-------|----------------------------------------------------------------------------------------------------------------------------------------------------------------------------------------------------------------------------------------------------------------------------------------------------------------------------------------------------------|

|    |                |       |                                                                         |
|----|----------------|-------|-------------------------------------------------------------------------|
| 1  |                |       |                                                                         |
| 2  | Allocation     | ✓ 16b | Mechanism of implementing the allocation sequence (eg, central          |
| 3  | concealment    |       | telephone; sequentially numbered, opaque, sealed envelopes),            |
| 4  | mechanism      |       | describing any steps to conceal the sequence until interventions are    |
| 5  |                |       | assigned                                                                |
| 6  |                |       |                                                                         |
| 7  | Implementation | ✓ 16c | Who will generate the allocation sequence, who will enrol participants, |
| 8  |                |       | and who will assign participants to interventions                       |
| 9  |                |       |                                                                         |
| 10 | Blinding       | ✓ 17a | Who will be blinded after assignment to interventions (eg, trial        |
| 11 | (masking)      |       | participants, care providers, outcome assessors, data analysts), and    |
| 12 |                |       | how                                                                     |
| 13 |                | ✓ 17b | If blinded, circumstances under which unblinding is permissible, and    |
| 14 |                |       | procedure for revealing a participant's allocated intervention during   |
| 15 |                |       | the trial                                                               |
| 16 |                |       |                                                                         |
| 17 |                |       |                                                                         |
| 18 |                |       |                                                                         |
| 19 |                |       |                                                                         |

### Methods: Data collection, management, and analysis

|    |                 |       |                                                                          |
|----|-----------------|-------|--------------------------------------------------------------------------|
| 21 |                 |       |                                                                          |
| 22 | Data collection | ✓ 18a | Plans for assessment and collection of outcome, baseline, and other      |
| 23 | methods         |       | trial data, including any related processes to promote data quality (eg, |
| 24 |                 |       | duplicate measurements, training of assessors) and a description of      |
| 25 |                 |       | study instruments (eg, questionnaires, laboratory tests) along with      |
| 26 |                 |       | their reliability and validity, if known. Reference to where data        |
| 27 |                 |       | collection forms can be found, if not in the protocol                    |
| 28 |                 |       |                                                                          |
| 29 |                 | ✓ 18b | Plans to promote participant retention and complete follow-up,           |
| 30 |                 |       | including list of any outcome data to be collected for participants who  |
| 31 |                 |       | discontinue or deviate from intervention protocols                       |
| 32 |                 |       |                                                                          |
| 33 |                 |       |                                                                          |
| 34 | Data            | ✓ 19  | Plans for data entry, coding, security, and storage, including any       |
| 35 | management      |       | related processes to promote data quality (eg, double data entry;        |
| 36 |                 |       | range checks for data values). Reference to where details of data        |
| 37 |                 |       | management procedures can be found, if not in the protocol               |
| 38 |                 |       |                                                                          |
| 39 |                 |       |                                                                          |
| 40 | Statistical     | ✓ 20a | Statistical methods for analysing primary and secondary outcomes.        |
| 41 | methods         |       | Reference to where other details of the statistical analysis plan can be |
| 42 |                 |       | found, if not in the protocol                                            |
| 43 |                 |       |                                                                          |
| 44 |                 | ✓ 20b | Methods for any additional analyses (eg, subgroup and adjusted           |
| 45 |                 |       | analyses)                                                                |
| 46 |                 |       |                                                                          |
| 47 |                 | ✓ 20c | Definition of analysis population relating to protocol non-adherence     |
| 48 |                 |       | (eg, as randomised analysis), and any statistical methods to handle      |
| 49 |                 |       | missing data (eg, multiple imputation)                                   |
| 50 |                 |       |                                                                          |
| 51 |                 |       |                                                                          |

### Methods: Monitoring

|    |                 |       |                                                                      |
|----|-----------------|-------|----------------------------------------------------------------------|
| 52 |                 |       |                                                                      |
| 53 |                 |       |                                                                      |
| 54 | Data monitoring | ✓ 21a | Composition of data monitoring committee (DMC); summary of its role  |
| 55 |                 |       | and reporting structure; statement of whether it is independent from |
| 56 |                 |       | the sponsor and competing interests; and reference to where further  |
| 57 |                 |       | details about its charter can be found, if not in the protocol.      |
| 58 |                 |       | Alternatively, an explanation of why a DMC is not needed             |
| 59 |                 |       |                                                                      |
| 60 |                 |       |                                                                      |

|    |          |       |                                                                        |
|----|----------|-------|------------------------------------------------------------------------|
| 1  |          |       |                                                                        |
| 2  |          | ✓ 21b | Description of any interim analyses and stopping guidelines, including |
| 3  |          |       | who will have access to these interim results and make the final       |
| 4  |          |       | decision to terminate the trial                                        |
| 5  |          |       |                                                                        |
| 6  | Harms    | ✓ 22  | Plans for collecting, assessing, reporting, and managing solicited and |
| 7  |          |       | spontaneously reported adverse events and other unintended effects     |
| 8  |          |       | of trial interventions or trial conduct                                |
| 9  |          |       |                                                                        |
| 10 | Auditing | ✓ 23  | Frequency and procedures for auditing trial conduct, if any, and       |
| 11 |          |       | whether the process will be independent from investigators and the     |
| 12 |          |       | sponsor                                                                |
| 13 |          |       |                                                                        |
| 14 |          |       |                                                                        |

## Ethics and dissemination

|    |                               |       |                                                                               |
|----|-------------------------------|-------|-------------------------------------------------------------------------------|
| 15 |                               |       |                                                                               |
| 16 |                               |       |                                                                               |
| 17 | Research ethics approval      | ✓ 24  | Plans for seeking research ethics committee/institutional review board        |
| 18 |                               |       | (REC/IRB) approval                                                            |
| 19 |                               |       |                                                                               |
| 20 | Protocol amendments           | ✓ 25  | Plans for communicating important protocol modifications (eg,                 |
| 21 |                               |       | changes to eligibility criteria, outcomes, analyses) to relevant parties      |
| 22 |                               |       | (eg, investigators, REC/IRBs, trial participants, trial registries, journals, |
| 23 |                               |       | regulators)                                                                   |
| 24 |                               |       |                                                                               |
| 25 |                               |       |                                                                               |
| 26 | Consent or assent             | ✓ 26a | Who will obtain informed consent or assent from potential trial               |
| 27 |                               |       | participants or authorised surrogates, and how (see Item 32)                  |
| 28 |                               |       |                                                                               |
| 29 |                               | ✓ 26b | Additional consent provisions for collection and use of participant data      |
| 30 |                               |       | and biological specimens in ancillary studies, if applicable                  |
| 31 |                               |       |                                                                               |
| 32 | Confidentiality               | ✓ 27  | How personal information about potential and enrolled participants will       |
| 33 |                               |       | be collected, shared, and maintained in order to protect confidentiality      |
| 34 |                               |       | before, during, and after the trial                                           |
| 35 |                               |       |                                                                               |
| 36 |                               |       |                                                                               |
| 37 | Declaration of interests      | ✓ 28  | Financial and other competing interests for principal investigators for       |
| 38 |                               |       | the overall trial and each study site                                         |
| 39 |                               |       |                                                                               |
| 40 | Access to data                | ✓ 29  | Statement of who will have access to the final trial dataset, and             |
| 41 |                               |       | disclosure of contractual agreements that limit such access for               |
| 42 |                               |       | investigators                                                                 |
| 43 |                               |       |                                                                               |
| 44 |                               |       |                                                                               |
| 45 | Ancillary and post-trial care | ✓ 30  | Provisions, if any, for ancillary and post-trial care, and for                |
| 46 |                               |       | compensation to those who suffer harm from trial participation                |
| 47 |                               |       |                                                                               |
| 48 | Dissemination policy          | ✓ 31a | Plans for investigators and sponsor to communicate trial results to           |
| 49 |                               |       | participants, healthcare professionals, the public, and other relevant        |
| 50 |                               |       | groups (eg, via publication, reporting in results databases, or other         |
| 51 |                               |       | data sharing arrangements), including any publication restrictions            |
| 52 |                               |       |                                                                               |
| 53 |                               |       |                                                                               |
| 54 |                               | ✓ 31b | Authorship eligibility guidelines and any intended use of professional        |
| 55 |                               |       | writers                                                                       |
| 56 |                               |       |                                                                               |
| 57 |                               | ✓ 31c | Plans, if any, for granting public access to the full protocol, participant-  |
| 58 |                               |       | level dataset, and statistical code                                           |
| 59 |                               |       |                                                                               |
| 60 |                               |       |                                                                               |

## Appendices

|                           |                                                                                                                                                                                                |
|---------------------------|------------------------------------------------------------------------------------------------------------------------------------------------------------------------------------------------|
| Informed consent ✓ 32     | Model consent form and other related documentation given to participants and authorised surrogates                                                                                             |
| Biological specimens ✓ 33 | Plans for collection, laboratory evaluation, and storage of biological specimens for genetic or molecular analysis in the current trial and for future use in ancillary studies, if applicable |

---

\*It is strongly recommended that this checklist be read in conjunction with the SPIRIT 2013 Explanation & Elaboration for important clarification on the items. Amendments to the protocol should be tracked and dated. The SPIRIT checklist is copyrighted by the SPIRIT Group under the Creative Commons "[Attribution-NonCommercial-NoDerivs 3.0 Unported](#)" license.

For peer review only



# BMJ Open

## Comparing Restrictive vs. Liberal Oxygen Strategies for Trauma Patients - The TRAUMOX2 Trial: Protocol for a Randomised Clinical Trial

|                               |                                                                                                                                                                                                                                                                                                                                                                                                                                                                                                                                                                                                                                                                                                                                                                                                                                                                                                                                                                                                                                                                                                                                                                                                                                                                                                                                                                                                                                                                                                                                                                                                                                                                                                                                                                                                                                                                                                                                                                                                                                                                                                                                                                                                             |
|-------------------------------|-------------------------------------------------------------------------------------------------------------------------------------------------------------------------------------------------------------------------------------------------------------------------------------------------------------------------------------------------------------------------------------------------------------------------------------------------------------------------------------------------------------------------------------------------------------------------------------------------------------------------------------------------------------------------------------------------------------------------------------------------------------------------------------------------------------------------------------------------------------------------------------------------------------------------------------------------------------------------------------------------------------------------------------------------------------------------------------------------------------------------------------------------------------------------------------------------------------------------------------------------------------------------------------------------------------------------------------------------------------------------------------------------------------------------------------------------------------------------------------------------------------------------------------------------------------------------------------------------------------------------------------------------------------------------------------------------------------------------------------------------------------------------------------------------------------------------------------------------------------------------------------------------------------------------------------------------------------------------------------------------------------------------------------------------------------------------------------------------------------------------------------------------------------------------------------------------------------|
| Journal:                      | <i>BMJ Open</i>                                                                                                                                                                                                                                                                                                                                                                                                                                                                                                                                                                                                                                                                                                                                                                                                                                                                                                                                                                                                                                                                                                                                                                                                                                                                                                                                                                                                                                                                                                                                                                                                                                                                                                                                                                                                                                                                                                                                                                                                                                                                                                                                                                                             |
| Manuscript ID                 | bmjopen-2022-064047.R1                                                                                                                                                                                                                                                                                                                                                                                                                                                                                                                                                                                                                                                                                                                                                                                                                                                                                                                                                                                                                                                                                                                                                                                                                                                                                                                                                                                                                                                                                                                                                                                                                                                                                                                                                                                                                                                                                                                                                                                                                                                                                                                                                                                      |
| Article Type:                 | Protocol                                                                                                                                                                                                                                                                                                                                                                                                                                                                                                                                                                                                                                                                                                                                                                                                                                                                                                                                                                                                                                                                                                                                                                                                                                                                                                                                                                                                                                                                                                                                                                                                                                                                                                                                                                                                                                                                                                                                                                                                                                                                                                                                                                                                    |
| Date Submitted by the Author: | 06-Sep-2022                                                                                                                                                                                                                                                                                                                                                                                                                                                                                                                                                                                                                                                                                                                                                                                                                                                                                                                                                                                                                                                                                                                                                                                                                                                                                                                                                                                                                                                                                                                                                                                                                                                                                                                                                                                                                                                                                                                                                                                                                                                                                                                                                                                                 |
| Complete List of Authors:     | <p>Baekgaard, Josefine; Rigshospitalet, Department of Anaesthesia and Trauma Centre, Centre of Head and Orthopaedics, University of Copenhagen</p> <p>Arleth, Tobias; Rigshospitalet, Department of Anaesthesia and Trauma Centre, Centre of Head and Orthopaedics, University of Copenhagen</p> <p>Siersma, Volkert; University of Copenhagen, The Research Unit for General Practice and Section of General Practice, Department of Public Health</p> <p>Hinkelbein, Jochen; University Hospital Cologne, Department of Anaesthesiology and Intensive Care Medicine, Faculty of Medicine</p> <p>Yuecetepe, Sirin; University Hospital Cologne, Department of Anaesthesiology and Intensive Care Medicine, Faculty of Medicine</p> <p>Klimek, M; Erasmus MC, Department of Anaesthesiology, University Medical Centre Rotterdam</p> <p>van Vledder, Mark; Erasmus MC, Trauma Research Unit Department of Surgery, University Medical Centre Rotterdam</p> <p>Van Lieshout, Esther M.M.; Erasmus MC, Trauma Research Unit Department of Surgery, University Medical Centre Rotterdam</p> <p>Mikkelsen, Søren; University of Southern Denmark, The Prehospital Research Unit; Odense University Hospital, Department of Anaesthesiology and Intensive Care</p> <p>Zwisler, Stine; University of Southern Denmark, The Prehospital Research Unit; Odense University Hospital, Department of Anaesthesiology and Intensive Care</p> <p>Andersen, M. S.; Aarhus University Hospital, Department of Anaesthesiology</p> <p>Fenger-Eriksen, Christian; Aarhus University Hospital, Department of Anaesthesiology</p> <p>Isbye, Dan; Rigshospitalet, Department of Anaesthesia and Trauma Centre, Centre of Head and Orthopaedics, Rigshospitalet, University of Copenhagen, Denmark; University of Copenhagen, Institute of Clinical Medicine</p> <p>Rasmussen, Lars; Rigshospitalet, Department of Anaesthesia and Trauma Centre, Centre of Head and Orthopaedics, Rigshospitalet, University of Copenhagen; University of Copenhagen, Institute of Clinical Medicine</p> <p>Steinmetz, Jacob; Rigshospitalet, Department of Anaesthesia and Trauma Centre, Centre of Head and Orthopaedics, Rigshospitalet,</p> |

1  
2  
3  
4  
5  
6  
7  
8  
9  
10  
11  
12  
13  
14  
15  
16  
17  
18  
19  
20  
21  
22  
23  
24  
25  
26  
27  
28  
29  
30  
31  
32  
33  
34  
35  
36  
37  
38  
39  
40  
41  
42  
43  
44  
45  
46  
47  
48  
49  
50  
51  
52  
53  
54  
55  
56  
57  
58  
59  
60

|                                  |                                                                                                                                                 |
|----------------------------------|-------------------------------------------------------------------------------------------------------------------------------------------------|
|                                  | University of Copenhagen; University of Copenhagen, Institute of Clinical Medicine                                                              |
| <b>Primary Subject Heading</b> : | Anaesthesia                                                                                                                                     |
| Secondary Subject Heading:       | Anaesthesia                                                                                                                                     |
| Keywords:                        | Adult anaesthesia < ANAESTHETICS, Adult intensive & critical care < ANAESTHETICS, TRAUMA MANAGEMENT, Respiratory physiology < THORACIC MEDICINE |
|                                  |                                                                                                                                                 |

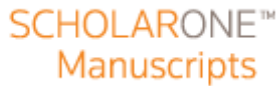

## Comparing Restrictive vs. Liberal Oxygen Strategies for Trauma Patients -

### The TRAUMOX2 Trial: Protocol for a Randomised Clinical Trial

*Josefine Baekgaard, MD Ph.D. (1); Tobias Arleth, MD (1); Volkert Siersma, PhD (2); Jochen Hinkelbein, MD, Dr. Med. DESA, EDIC, FAsMA (3); Sirin Yucetepe, MD (3); Markus Klimek, MD, Ph.D. (4); Mark G. Van Vledder, MD, Ph.D. (5); Esther M.M. Van Lieshout, Ph.D., MSc (5); Søren Mikkelsen, MD, Ph.D. (6,7); Stine Thorhaug Zwisler, MD, Ph.D. (6,7); Mikkel Andreas Strømgaard Andersen, MD, Ph.D. (8); Christian Fenger-Eriksen, MD, Ph.D. (8); Dan L. Isbye, MD, Ph.D. (1, 9); Lars Simon Rasmussen, MD, Ph.D., DMSc. (1, 9); Jacob Steinmetz, MD, Ph.D. (1, 9, 10)*

1. Department of Anaesthesia and Trauma Centre, Centre of Head and Orthopaedics, Rigshospitalet, University of Copenhagen, Denmark
2. The Research Unit for General Practice and Section of General Practice, Department of Public Health, University of Copenhagen, Copenhagen, Denmark
3. Department of Anaesthesiology and Intensive Care Medicine, Faculty of Medicine and University Hospital of Cologne, Germany
4. Department of Anaesthesiology, Erasmus MC, University Medical Centre Rotterdam, Rotterdam, The Netherlands
5. Trauma Research Unit Department of Surgery, Erasmus MC, University Medical Centre Rotterdam, Rotterdam, The Netherlands
6. The Prehospital Research Unit, Region of Southern Denmark, University of Southern Denmark, Odense, Denmark
7. Department of Anaesthesiology and Intensive Care, Odense University Hospital, Odense, Denmark

1  
2  
3  
4  
5  
6  
7 8. Department of Anaesthesiology, Aarhus University Hospital

8  
9 9. Institute of Clinical Medicine, University of Copenhagen, Denmark

10  
11 10. Danish Air Ambulance, Aarhus, Denmark  
12  
13  
14  
15  
16

17 **Corresponding author:**

18  
19  
20 Josefine Baekgaard, MD, Ph.D.

21  
22 e-mail: [josefinebaekgaard@me.com](mailto:josefinebaekgaard@me.com)

23  
24 Affiliation: Department of Anaesthesia and Trauma Centre, Centre of Head and Orthopaedics, Rigshospitalet,  
25  
26 University of Copenhagen, Denmark  
27  
28  
29  
30  
31  
32  
33  
34  
35  
36  
37  
38  
39  
40  
41  
42  
43  
44  
45  
46  
47  
48  
49  
50  
51  
52  
53  
54  
55  
56  
57  
58  
59  
60

## General information and administrative Structure

Chief investigator and sponsor: Jacob Steinmetz

Coordinating investigator: Tobias Arleth

Study coordinator: Josefine Baekgaard

Steering Committee (in alphabetic order): Jacob Steinmetz, Jochen Hinkelbein, Josefine Baekgaard, Lars Simon Rasmussen, Markus Klimek, Tobias Arleth

Statistician: Volkert Siersma

Primary investigators: Jochen Hinkelbein, Mikkel Andreas Strømgaard Andersen, Søren Mikkelsen, Mark van Vledder

Data monitoring and safety committee: Bodil Steen Rasmussen (chairman, physician), Marius Rehn (member, physician), Lars Wiuff Andersen (member, physician) and Brice Ozenne (member, biostatistician)

## ABSTRACT

**Introduction:** Supplemental oxygen is commonly used in trauma patients, although it may lead to hyperoxaemia that has been associated with pulmonary complications and increased mortality. The primary objective of this trial, TRAUMOX2, is to compare a restrictive versus liberal oxygen strategy the first eight hours following trauma.

**Methods and Analysis:** TRAUMOX2 is an investigator-initiated, international, parallel-grouped, superiority, outcome assessor- and analyst-blinded, randomised, controlled, clinical trial.

Adult patients with suspected major trauma are randomised to eight hours of a restrictive or liberal oxygen strategy. The restrictive group receives the lowest dosage of oxygen ( $\geq 21\%$ ) that ensures an SpO<sub>2</sub> of 94%. The liberal group receives 12-15 L O<sub>2</sub>/min or FiO<sub>2</sub>=0.6-1.0.

The primary outcome is a composite of 30-day mortality and/or development of major respiratory complications (pneumonia and/or ARDS).

With 710 participants in each arm we will be able to detect a 33% risk reduction with a restrictive oxygen strategy if the incidence of our primary outcome is 15% in the liberal group.

**Ethics and dissemination:** TRAUMOX2 is carried out in accordance with the Helsinki II Declaration. It has been approved by the Danish Committee on Health Research Ethics for the Capital Region (H-21018062) and The Danish Medicines Agency, as well as the Dutch Medical Research Ethics Committee Erasmus MS (NL79921.078.21 and MEC-2021-0932). A website ([www.traumox2.org](http://www.traumox2.org)) is available for updates and study results will be published in an international peer-reviewed scientific journal.

### Strengths and limitations

- TRAUMOX2 is an investigator-initiated, international, multicentre, parallel-grouped, superiority, outcome assessor- and analyst-blinded, randomised, controlled, clinical trial.
- The oxygen treatment in current trauma management is challenged in this trial with trauma patients being randomised to two different oxygen strategies in the initial period post trauma.
- The intervention is open label, and the assessment of the primary outcome is blinded.
- The international setup will allow clinically relevant and generalizable results.
- Oxygen delivered to the tissues is dependent on other factors not directly accounted for in this trial, such as cardiac output and blood loss.

**Registration details:** European Union Drug Regulating Authorities Clinical Trials Database (EudraCT) (2021-000556-19); [www.clinicaltrials.gov](http://www.clinicaltrials.gov). (NCT05146700)

## INTRODUCTION

### BACKGROUND AND RATIONALE

In trauma resuscitation supplemental oxygen is often administered to treat or prevent hypoxaemia as recommended by the Advanced Trauma Life Support manual.[1] This guideline does not have a specific therapeutic goal. Oxygen is administered in many other situations too, sometimes in a non-consistent manner[2–4] and very often without even being prescribed.[5] In a recent systematic review our group found the evidence for the use of supplemental oxygen in the trauma population to be sparse.[6] Nevertheless, in a large retrospective study on 864,340 trauma patients a propensity score matching analysis showed the administration of supplemental oxygen was associated with a significantly increased risk of in-hospital mortality and acute respiratory distress syndrome (ARDS).[7] Furthermore, a recent systematic review and meta-analysis comparing liberal versus restrictive oxygen strategy for a broad mix of acutely ill medical and surgical patients found an association between liberal oxygen administration and increased mortality.[8] Of note, only one small study on trauma patients (patients with traumatic brain injury), which did not report mortality data, was included. Conversely this study showed that degree of disability was significantly reduced at six months in the group receiving liberal compared to restrictive oxygen.[9]

Hyperoxaemia is a common finding in trauma patients[5,10] and in mechanically ventilated patients in general.[11,12] However, in the Intensive Care Unit (ICU) and in surgical patients hyperoxaemia has been associated with major pulmonary complications.[13,14] For example, a recent retrospective study found hyperoxaemia to be an independent risk factor for ventilator associated pneumonia .[14] Nevertheless, a highly debated recommendation from the World Health Organisation states that adult patients undergoing general anaesthesia for surgical procedures should receive an  $\text{FiO}_2$  of 0.80 intraoperatively as well as in the immediate postoperative period for two to six hours to reduce the risk of surgical site infection.[15] A randomised study, however, found no difference in the risk of surgical site infection according to  $\text{FiO}_2$  concentration intraoperatively.[16] Furthermore, a study on 152,000 mechanically ventilated patients found no association between hyperoxia and mortality during the first 24 hours in the ICU,[17] and another study on 14,000 mixed ICU patients found that a  $\text{PaO}_2$  of approximately 18 kPa resulted in the lowest mortality.[18] Finally, a recent study randomised 2928 ICU patients to either low or high arterial oxygen tension target (defined as 8 vs 12 kPa), for a maximum of 90 days and found no difference in mortality.[19]

Therefore, whether the trauma population could benefit from a more restrictive supplemental oxygen approach than recommended by current international trauma guidelines presents a large and important knowledge gap. In a recent pilot randomised clinical trial (*TRAUMOX1*[20], Clinicaltrials.gov Registration number: NCT03491644) we compared a restrictive and a liberal oxygen strategy for 24 hours after trauma (N=41) and found maintenance of normoxaemia following trauma using a restrictive oxygen strategy to be feasible. The study served as the basis for the following larger clinical trial; *TRAUMOX2*.

In *TRAUMOX2* we hypothesize that a restrictive compared to a liberal oxygen strategy for eight hours following trauma will result in a lower rate of 30-day mortality and/or major respiratory complications (pneumonia and/or ARDS) (combined endpoint).

## METHODS

### *Study setting*

The protocol has been written according to the Standard Protocol Items: Recommendations for Interventional Trials (SPIRIT) 2013 statement and is version 1.6.[21] The SPIRIT 2013 checklist is presented in Appendix 1.

TRAUMOX2 is an investigator-initiated, international, multicentre, parallel-grouped, superiority, outcome assessor- and analyst-blinded, randomised, controlled, clinical trial.

Participating trauma centres must be able to provide definitive treatment of trauma patients (tertiary care i.e. no transfer to more specialized institution needed), possess a trauma registry, and have an average of approximately 400 trauma patients per year. All trauma centres must be within the EU and thus the EU Clinical Trial Regulation are applied. A complete list of the study sites can be viewed on the trial website ([www.traumox2.org](http://www.traumox2.org)).

### *Eligibility criteria*

Patients aged 18 years or older, including fertile women, are included. Participants must have undergone blunt or penetrating trauma, be directly transferred from the scene of accident to one of the participating trauma centres and trigger trauma team activation (no secondary transfers from other hospitals). Moreover, the including physician must initially expect a hospital length of stay for 24 hours or longer. Patients with no/minor injuries after secondary survey are excluded if they are expected to be discharged within 24 hours to ensure only patients with a substantial trauma are included. Patients in cardiac arrest before or on admission and patients with a suspicion of carbon monoxide intoxication are excluded.

### *Interventions*

Participants are randomised to eight hours of either restrictive or liberal supplemental oxygen treatment. The restrictive group receives the lowest dosage of oxygen ( $\geq 21\%$ ) that ensures an arterial oxyhaemoglobin saturation ( $\text{SpO}_2$ , measured by pulse oximetry) target of 94% either using no supplemental oxygen, a nasal cannula, a non-rebreather mask, or mechanical ventilation (intubated patients). Thus, only trial participants without a need for supplemental oxygen to maintain an  $\text{SpO}_2 \geq 94\%$  can saturate above 94%. The liberal group receives 15 L  $\text{O}_2/\text{min}$  via a non-rebreather mask for non-intubated trial participants and an  $\text{FiO}_2=1.0$  for intubated trial patients in the prehospital setting, in the trauma bay and during intrahospital transportation. In the operating room, ICU, post-anaesthesia care unit and ward the flow/  $\text{FiO}_2$  may be reduced to 12 L  $\text{O}_2/\text{min}/\text{FiO}_2=0.6$  if the arterial oxygen saturation  $\geq 98\%$ . In both groups, pre-oxygenation should be done prior to intubation.

### *Outcomes*

The primary outcome is a composite of 30-day mortality and/or development of major respiratory complications (pneumonia and/or ARDS). Secondary outcomes include mortality at 30 days and 12 months post trauma, major respiratory complications (pneumonia and acute respiratory distress syndrome) within 30 days, hospital length of stay (HOS LOS), ICU length of stay (ICU LOS), days alive outside the ICU, time on mechanical ventilation (until 30 days), days alive without mechanical ventilation, re-intubation within 30 days, pneumonia post-discharge, surgical site infections within 30 days, episodes with hypoxaemia during intervention ( $\text{SpO}_2 < 90\%$ ), and EQ-5D-5L score at six and 12 months post trauma, and Glasgow Outcome Scale-Extended (GOSE) at six and 12 months post trauma. The EQ-5D-5L score is a widely used generic measure for health-related quality of life, and [22] GOSE assesses physical and mental consequences of traumatic brain injury.[23]

### *Randomisation*



1  
2  
3  
4 Patients are randomised 1:1 in variable block sizes and stratified by centre (prehospital base or trauma centre) and  
5 tracheal intubation at inclusion. The randomisation table is generated outside of REDCap by a statistician otherwise  
6 not affiliated with the study. The allocation sequence list and block size are only known by the statistician and will  
7 remain concealed from the investigators. Prior to randomisation, a proxy consent must be obtained (or according to  
8 legislation in each country). Afterwards, randomisation is determined by opening a concealed envelope with  
9 information on allocation. The envelopes are available both pre- and in-hospital. Each concealed envelope contains a  
10 study ID that matches a study ID on the randomisation list generated by the statistician.  
11  
12

#### 13 14 *Participant timeline*

15  
16 Please see figure 1.

#### 17 18 *Blinding*

19  
20 The study outcome assessor- and analyst-blinded with regards to treatment: treating staff are aware of the trial  
21 participants' randomisation group. However, at least two allocation blinded primary outcome assessors (specialists in  
22 anaesthesia, intensive care, emergency medicine or similar) are appointed in each country to assess in-hospital lung  
23 complications (pneumonia and/or ARDS). Blinding is ensured by concealing all information indicative of the allocation  
24 prior to assessment.

25  
26 The statistician and manuscript writers will be blinded towards the allocation of treatment once the trial ends when  
27 data is being analysed and the manuscript is drafted.  
28

#### 29 30 *Recruitment and assignment of interventions*

31  
32 Depending on the possibilities of the recruiting site, patients are randomised and included either in the prehospital  
33 phase or in the trauma bay:

##### 34 35 *Prehospital phase (optional)*

36  
37 As soon as possible and after immediate and necessary life-saving procedures have been performed, a prehospital  
38 emergency physician (the including physician) assesses a patient eligible for inclusion. If all inclusion criteria are met,  
39 the including physician obtains proxy consent through a legally appointed study guardian (physician) by telephone.  
40 Proxy consent before inclusion may not be necessary in all participating countries. National rules and laws are  
41 followed in the specific country on both proxy consent as well as trial participant/trial participant's next-of-kin consent  
42 in general. Once the trauma patient is included, the including physician randomises the trial participant to the  
43 intervention (restrictive oxygen strategy) or control (liberal oxygen strategy) group by opening a concealed envelope  
44 with information on the allocation. The including physician registers the trial participant in an electronic database. If  
45 the trial participant is transported by helicopter, it is advised to fly at the lowest reasonable altitude to reduce the  
46 alterations from normal atmospheric oxygen tension at sea level. Treatment is initiated and continued for eight hours  
47 after enrolment. Time of initiation equals T0 (see figure 1).  
48  
49

##### 50 51 *Trauma bay*

52  
53 As soon as possible or after immediate and necessary life-saving procedures have been performed the including  
54 physician (e.g. the trauma leader or an attending anaesthesiologist) judges whether the patient is eligible for the  
55 study. If eligible, the including physician obtains proxy consent through a legally appointed study guardian (physician).  
56 Proxy consent before inclusion may not be necessary in all participating countries. National law is followed in the  
57 specific country on both proxy consent as well as trial participant/trial participant's next-of-kin consent in general.  
58 Once the trauma patient is included, the including physician randomises the trial participant to the intervention  
59  
60

1  
2  
3  
4 (restrictive oxygen strategy) or control (liberal oxygen strategy) group by opening a concealed envelope with  
5 information on allocation. The including physician registers the trial participant in an electronic database. Treatment is  
6 initiated and continued for eight hours after enrolment. Time of initiation equals T0 (see figure 1) and must not be  
7 delayed more than 90 minutes after hospital arrival.  
8

#### 9 10 *Consent*

11 Consent procedures vary according to including location. In broad terms, the patients eligible for inclusion in the trial  
12 are temporarily incompetent because of the acute and severe condition related to their traumatic injuries. The trauma  
13 patients are eligible either on the scene of accident or upon arrival in the trauma bay where early resuscitation with  
14 the use of multiple interventions and even surgery may be necessary. Symptoms include severe pain, impaired  
15 consciousness, and early complications are circulatory and respiratory failure requiring emergency intubation. Some  
16 of these trial participants are expected to die. The intervention tested in this trial is pivotal to be given immediately in  
17 the early phase of resuscitation. In clinical trials aiming to improve treatment of traumatic injuries it is necessary to  
18 include unconscious and incompetent patients as no clinically relevant animal model exists. As soon as possible, local  
19 consent procedures are followed. In Denmark, proxy consent is first obtained through a legally appointed study  
20 guardian. Hereafter, consent is sought by the trial participants' next-of-kin as soon as possible, and when possible,  
21 consent is sought by the trial participant. If the trial participant is not able to consent within 30 days, consent from the  
22 next-of-kin is accepted as the final consent. If the next-of-kin is unavailable, a secondary proxy consent can be  
23 obtained through a legally appointed study guardian, and this can also be accepted as the final consent. Detailed  
24 consent procedures in specific locations can be found on the trial website.  
25  
26  
27

#### 28 29 *Data collection methods, registration, and monitoring*

30 Oxygen dosages and saturations are recorded every hour and two arterial blood gas analyses are obtained and noted  
31 in a paper data collection sheet specifically made for this study ("Randomisation, data collection sheet and REDCap  
32 inclusion", available on the study website). Further data collection is obtained by accessing the trial participants'  
33 medical records. Data points include trial participant characteristics (name, unique patient identifier, age, sex, height,  
34 weight), prehospital data (vital signs, trauma mechanism, details on supplemental oxygen in the prehospital phase  
35 (indication, SpO<sub>2</sub>, supplemental oxygen yes/no, intubation yes/no, oxygen flow/FiO<sub>2</sub>), Injury Severity Score, complete  
36 list of injuries, transportation mode to the trauma bay), time points (date and time of trauma, on-scene arrival and  
37 departure, trauma bay arrival, ICU/ward arrival, time of intubation/extubation/re-intubation for intubated trial  
38 participants, time of surgery, duration of surgery), hospital and ICU length of stay, vital signs on arrival to the trauma  
39 bay (including arterial blood gas analysis if available), in-hospital variables (pneumonia, ARDS, other infections  
40 (surgical site infection or sepsis)), ischaemic events within 7 days after admission (myocardial infarction or cerebral  
41 ischemia), Adverse Events and Serious Adverse Events (SAE), co-morbidities prior to trauma (categorised in heart  
42 disease, lung disease, other diseases), active smoker (yes/no), specifics of possible brain injury (type and extent) and  
43 other cerebral complications, and time until of death.  
44  
45  
46  
47

48 Trial participants with traumatic brain injury admitted to a neurosurgical intensive care unit can be monitored  
49 according to standard practice in the local facility. It is acceptable, but optional, to perform continuous  
50 intraparenchymal brain oxygen measurements.  
51

52  
53 For all TRAUMOX2 trial participants it is possible to deviate from the protocol if clinically justified by the treating  
54 physician. Such deviations should always be documented including the clinical justification.  
55

56 Mortality status is collected through local registries or according to local practice. EQ-5D-5L and GOSE score are  
57 collected through telephone interviews, either with the trial participant or with the trial participant's next-of-kin or  
58  
59  
60

caregiver. Possible pneumonia post-discharge is evaluated through medicines prescribed after hospital discharge in countries where this information is available.

All trial participants will have two arterial blood gasses (ABGs) drawn within the intervention period. The first ABG is drawn at hour  $1 \pm 30$  minutes (T1) after randomisation (initiation of intervention is considered hour 0). If an ABG is not obtainable at hour 1 due to still being prehospital or other circumstances, the ABG must be obtained as soon as possible. The second ABG is drawn at hour  $6 \pm 2$  hours (T6). If more than two ABGs are collected during the intervention (ABGs not related to the study), the ABGs closest to the specified time slots (T1 and T6) should be used for data entry.

Furthermore, the trial participant or his/her next-of-kin is asked for an additional and separate consent form, not directly related to this research project, to have their blood stored in a biobank established for future research. It is optional whether the participating centres contribute to the biobank.

Data is stored in an electronic, web-based, secure, centralised, user-friendly interface using a data collection sheet in REDCap[24] specifically made for this trial. This data management system is secure, fully compliant with all regulatory guidelines and a complete audit-trail for data entry validation. Trained members of the research team are responsible for data collection and entry into REDCap using local electronic clinical registries. Therefore, the electronic case report form (eCRF) is digital. In case of system malfunction, a paper version of the data collection sheet is available. The REDCap database is set up from Rigshospitalet in the Capital Region in Denmark and participating centres are invited to data entry in this database.

External monitoring of registered data is applied at all trial centres.

### Definitions

**Pneumonia** is defined as per the CDC criteria[25].

**ARDS** is defined as per the Berlin definition[26].

**Traumatic brain injury** is defined as[27]:

- Severe: Abbreviated Injury Scale (AIS)  $\geq 5$
- Moderate: AIS 3–4
- Mild: AIS 1–2

Please see figure 2 for a detailed description of pneumonia and ARDS.

### Statistical Analysis

In larger studies, mortality from trauma has been estimated to be around 6-12%,[28] and the incidence of ventilator associated pneumonia post trauma to be almost 30%.[14] With 710 trial participants in each arm, we will be able to detect a 33% risk reduction with a restrictive supplemental oxygen strategy (with 80% power at the 5% significance level) if the incidence of our primary outcome is 15% in the liberal group. Our primary analysis will be a modified intention-to-treat analysis, but a per-protocol analysis will also be carried out. A detailed statistical analysis plan, including the pre-specified subgroup analyses, will be made. In the primary analysis, we will exclude trial participants where no injuries are found, defined as Injury Severity Score=0.

1  
2  
3  
4 If less than 5% of data required for any specific analysis on primary or secondary outcomes are missing, a complete  
5 case analysis will be performed. If more than 5% are missing, and it is concluded that data are not 'missing completely  
6 at random' inverse probability weighting will be used to correct possible bias.[29] A sensitivity analysis on the  
7 assumptions used for missing data will be done to verify robustness.  
8

9  
10 Inclusion of trial participants will end when the goal of 1420 evaluable trial participants has been reached including  
11 the 30-day follow up period. This means that the maximum number of trial participants will be 1600 as inclusion will  
12 continue during evaluation of the 30-day follow-up. EQ-5D-5L score and GOSE score at six months and 12 months will  
13 be obtained. Mortality at 30 days and 12 months will also be obtained. The primary composite outcome will be  
14 compared between the two groups using logistic regression reported as Odds Ratio with 95% CI. The primary analysis  
15 will be adjusted for age, sex, centre, intubated at randomisation (yes/no), and known pneumonia on admission (under  
16 treatment). Secondary outcomes will also be compared between the two groups using logistic regression for  
17 dichotomous data and linear regression for continuously valued outcomes. We will use a 5% significance level. Any  
18 changes or additional analyses will be reported.  
19

20  
21 In the per-protocol analysis, all trial participants with  $\geq 1$  major protocol violation will be removed.  
22

23 Specified subgroup analyses will be made on trial participants initially intubated (within one hour of the accident)  
24 (yes/no), trial participants with ICU admission (yes/no), trial participants with moderate and severe traumatic brain  
25 injuries (yes/no), trial participants with chronic pulmonary disease (yes/no), registered episodes with hypoxaemia as  
26 well as an analysis on trial participants enrolled prehospital versus in-hospital. An analysis adjusted for Injury Severity  
27 Score will also be conducted.  
28

29  
30 The statistical analysis will be performed by a statistician.  
31

### 32 *Recruitment Status*

33  
34 August 19<sup>th</sup>, 2022 the trial had included 479 patients (34%) and recruitment is thus ongoing.  
35

### 36 *Adverse and serious adverse events*

37  
38 To monitor adverse events a TRAUMOX2 investigator assesses the trial participant's medical record once within the  
39 first 24 hours and every third day until discharge (maximum of 30 days).  
40

41 This group of trial participants are expected to have a lot of complications. It is the established practice in trials on  
42 critically ill patients that adverse events are part of the natural trajectory of the primary disease process or expected  
43 complications of the critical illness.[30] Therefore, we have chosen to record only the occurrence of atelectasis and  
44 irritability of airway mucosa.  
45

46 All SAEs are registered. The registration is done in REDCap and once a SAE registration is complete, the sponsor and  
47 coordinating investigator receives an e-mail notification immediately via the REDCap notification e-mail system.  
48

### 49 *Ethics and dissemination*

50  
51 Trial participant insurances are in place at all trial sites either through the national health insurance or through  
52 specifically supplied local trial insurances as required according to the specific trial sites and national regulations.  
53

54 This RCT is carried out in accordance with the principles from the Helsinki II Declaration in its latest version.[31] The  
55 protocol has been approved by the Danish Committee on Health Research Ethics for the Capital Region of Denmark  
56 (H-21018062) and The Danish Medicines Agency, as well as the Dutch Medical Research Ethics Committee Erasmus  
57 MS (NL79921.078.21 and MEC-2021-0932). It is monitored by the regional Good Clinical Practice Unit. Data  
58  
59  
60

1  
2  
3  
4 management must be approved according to national legislation. Furthermore, the trial has been registered in the  
5 European Union Drug Regulating Authorities Clinical Trials Database (EudraCT) (2021-000556-19) as well as on  
6 [www.clinicaltrials.gov](http://www.clinicaltrials.gov) (NCT05146700).  
7

8 Finally, a website ([www.traumox2.org](http://www.traumox2.org)) is available for further information and updates on the trial.  
9

### 10 **Protocol changes**

11  
12 Protocol changes can only be decided by the steering committee. All trial documents, including protocol amendments  
13 are available on the public TRAUMOX2 website and communicated to relevant parties when found appropriate.  
14

### 15 **Timeline of study progress**

16  
17 Inclusion began December 7<sup>th</sup>, 2021 and is expected to be completed early 2024. Data analysis and manuscript  
18 drafting will commence autumn 2024. And thus, the submission of the primary paper is expected at the beginning of  
19 year 2025.  
20

### 21 *Data monitoring and safety committee*

22  
23 An independent data monitoring- and safety committee (DMSC) has been set up. The committee includes a  
24 statistician. The committee will meet when information on 30-day mortality has been collected in 355 (approximately  
25 25% of the sample size estimation) and 710 (approximately 50% of the sample size estimation) trial participants. Prior  
26 to the meeting, a statistician will perform an interim analysis with blinded data provided by the sponsor and principal  
27 investigator. Criteria for premature termination will be decided by the steering committee. Furthermore, the sponsor  
28 has the responsibility to report the overall number of SAEs yearly to the DMSC. Detailed information on the DMSC is  
29 available on the study website.  
30  
31

### 32 **Publication Policy**

33  
34 The study results will be published in an appropriate international peer-reviewed scientific journal. Once the study  
35 results are published, it will be announced on the study website. The study is registered, and study results will be  
36 disclosed by the coordinating principal investigator in one or more public clinical study registry(ies), according to  
37 national/international use, including both positive, negative and inconclusive results. The registration will include a list  
38 of the investigational centres. The steering committee and the primary centre investigator (active) will be listed as co-  
39 authors in the publications. If the centre involves prehospital inclusion the prehospital centre investigator (active) will  
40 be co-author. Top-enrolling centres will be able to designate one additional co-author for every completely  
41 documented 100 trial participants. Blinded outcome assessors and the statistician doing the analyses can also qualify  
42 as co-authors. All authors must fulfil the criteria for authorship according to the ICMJE group. Each contributing centre  
43 can designate a reasonable number of active collaborators that participates in the study administration. These  
44 collaborators will be mentioned in the TRAUMOX2-study group and will be trackable via PubMed. In line with the  
45 principles of data preservation and sharing, the steering committee will, after publication of the overall dataset,  
46 consider all reasonable requests to make the dataset available in whole or part for secondary analyses and scientific  
47 publication. The steering committee will consider proposals for secondary analyses based on the scientific quality of  
48 the proposal. Proposals will need to be revised and approved by the steering committee prior to submission.  
49  
50  
51

### 52 **Archiving of Documents**

53  
54 The investigator will keep the subject's files and original data according to the local methods and facilities. The  
55 investigator will maintain the trial documents as specified in the ICH-GCP-Guideline for 10 years. The investigator/  
56 institution will take measures to prevent accidental or premature destruction of these documents.  
57  
58  
59  
60

1  
2  
3  
4  
5  
6  
7  
8  
9  
10  
11  
12  
13  
14  
15  
16  
17  
18  
19  
20  
21  
22  
23  
24  
25  
26  
27  
28  
29  
30  
31  
32  
33  
34  
35  
36  
37  
38  
39  
40  
41  
42  
43  
44  
45  
46  
47  
48  
49  
50  
51  
52  
53  
54  
55  
56  
57  
58  
59  
60

**Patient and Public Involvement**

Patients were not involved in the planning of this study. Trial participants will be given the opportunity to access the outcomes of the study once published.

For peer review only

## Discussion

Oxygen has been used for centuries, but the evidence supporting its use remains sparse. The trauma population is particularly exposed to high concentrations of oxygen[1,3,4,10,32,33], although evidence for supplementary oxygen for the trauma population is extremely limited.[6,34] This is also evident in the newly updated guidelines on oxygen use in adults in the emergency setting published by the British Thoracic Society.[35] In trauma, they recommend initial management with high-concentration oxygen therapy and a target SpO<sub>2</sub> of 94–98% for both hypoxaemic patients and patients ‘at risk of hypoxaemia’. This, however, is a Grade D recommendation.

As mentioned in the introduction, a recently published meta-analysis in the *Lancet* concluded that clinicians should aim for a target SpO<sub>2</sub> of 94–96% in acutely ill patients.[8] Their analysis compared liberal versus conservative oxygen strategies and found increased rates of mortality for patients with SpO<sub>2</sub> above 96% compared to 94–96%. Of note, the trial sequential analysis in the meta-analysis was driven primarily by a single large randomised trial,[36] preventing the authors from excluding a small beneficial effect of liberal oxygen therapy. Furthermore, only one study on trauma patients was included.

Nonetheless, there is an increasing concern regarding the detrimental effects of hyperoxaemia, and thus targeting normoxaemia becomes appealing. However, the impact of pursuing normoxaemia on the prevalence of hypoxic episodes is unknown. Normoxia thus suddenly represents the fragile middle ground between two states of which we know one to be harmful and fear the other is too. However, in TRAUMOX1 maintenance of normoxaemia post trauma appeared feasible and there were few episodes of hypoxaemia.[20] Thus, TRAUMOX1 forms the basis of the current trial, TRAUMOX2, that aims to provide high-level evidence on the implications of supplemental oxygen.

In TRAUMOX2 the intervention is an SpO<sub>2</sub> target in the restrictive group and an FiO<sub>2</sub> target in the liberal group. Given the sigmoid shape of the oxygen dissociation curve, however, the PaO<sub>2</sub> resulting from a given FiO<sub>2</sub> and SpO<sub>2</sub> can vary greatly. Nevertheless, a trial must be feasible, and in the acute phase post trauma, careful titration of the PaO<sub>2</sub> is not feasible. A large retrospective study on 864,340 trauma patients found that trauma patients with and SpO<sub>2</sub>> 97% in the emergency department had a higher risk of in-hospital mortality if they received supplemental oxygen.[7] A large randomised study on patients with myocardial infarction showed that targeting an SpO<sub>2</sub> of 94% resulted in a decrease in myocardial injury and myocardial infarct size.[37] Another study has shown a dramatic increase in the occurrence of hyperoxaemia when SpO<sub>2</sub> was above 95%,[38] and for those reasons, we have chosen SpO<sub>2</sub> 94% to be the target in the restrictive group. The SpO<sub>2</sub> is recorded once every hour during the intervention and aims to represent the median SpO<sub>2</sub> during that hour. If multiple measurements are available, e.g. in the ICU, the median is calculated. It could be argued that continuous measurements, e.g. an SpO<sub>2</sub> every minute, would be favourable. However, the trial aims to be pragmatic, and everyday care in the general ward does not allow for careful titration of the SpO<sub>2</sub> more than once an hour.

Furthermore, the FiO<sub>2</sub> target in the liberal group is based on a guideline where oxygen is recommended for all trauma patients.[1] However, the recommendation is without a specific therapeutic goal. In TRAUMOX1, however, some clinicians were concerned about the concentration and duration of oxygen in the liberal group. Therefore, the concentration may be diminished to 0.60 or 12 L O<sub>2</sub>/min on a non-rebreather mask once the trial participant reaches the OR, ICU, post-anaesthesia care unit or ward if the saturation is at least 98%.

In a retrospective study of intubated trauma patients we found that the FiO<sub>2</sub> seemed to be high in the first hours after trauma followed by a steady decline until a stable plateau of approximately 0.30-0.40 after 10-12 hours was reached.[39] Furthermore, in a randomised trial, administration of 0.80 compared with 0.30 oxygen in the perioperative period (median time with intervention= 5.5 hours) was associated with significantly increased long-term mortality.[40] Therefore, the duration of the intervention altogether has been diminished from 24 hours to eight hours to ensure to represent only the most acute phase post trauma until careful oxygen titration becomes possible.

It should be acknowledged that oxygen delivered to the tissues is dependent on numerous factors which are not directly accounted for in this trial, such as cardiac output and haemoglobin levels. In addition, some patients may have

1  
2  
3  
4 pulmonary dysfunction with impaired oxygenation, for instance after chest trauma. The data collected in our pragmatic  
5 study will not allow a detailed analysis of all these factors, but haemoglobin levels and the presence of chest trauma  
6 are registered. The impact of both could subsequently be explored.  
7

8  
9 In TRAUMOX1 the median time from trauma to arrival in the trauma bay was 51 [29-68] minutes. In larger, more  
10 geographically challenging countries, however, this time gap may be much longer, and therefore prehospital inclusion  
11 is aimed for whenever possible in TRAUMOX2 to diminish time in the acute phase without any allocated intervention  
12 begun.  
13

14 The primary outcome of the trial is the incidence of pulmonary complications and/or death within 30 days (combined  
15 outcome). This is done to increase the event rate, but also because both outcomes are very important to the trauma  
16 patient: the majority of trauma patients are free from co-morbidities and independent prior to their trauma,[41,42]  
17 but still each year 5.8 million people die as a result of trauma.[43] Furthermore, the incidence of pneumonia in  
18 trauma patients has been reported to be as high as 26-44% leading to disability and prolonged hospital stay.[44,45]  
19 Furthermore, trauma constitutes a major economic burden, as trauma-related costs were estimated to \$671 billion in  
20 the United States alone in 2013.[46] Understanding whether supplemental oxygen plays a role in the outcome for the  
21 trauma patient is thus of utmost importance.  
22  
23  
24  
25  
26  
27  
28  
29  
30  
31  
32  
33  
34  
35  
36  
37  
38  
39  
40  
41  
42  
43  
44  
45  
46  
47  
48  
49  
50  
51  
52  
53  
54  
55  
56  
57  
58  
59  
60



1  
2  
3  
4 *Figure 1 – Timeline of patients randomised to either liberal or restrictive oxygen approach from trauma to end of*  
5 *follow-up*  
6

7 *Figure 2 – Pneumonia and ARDS (Acute Respiratory Distress) definitions*  
8  
9  
10  
11  
12  
13  
14  
15  
16  
17  
18  
19  
20  
21  
22  
23  
24  
25  
26  
27  
28  
29  
30  
31  
32  
33  
34  
35  
36  
37  
38  
39  
40  
41  
42  
43  
44  
45  
46  
47  
48  
49  
50  
51  
52  
53  
54  
55  
56  
57  
58  
59  
60

For peer review only

**Funding**

TRAUMOX2 is initiated by a research group of medical doctors in “Department of Anaesthesia and Trauma Centre, Centre of Head and Orthopaedics, Rigshospitalet, Denmark “. The work presented in this article is supported by Novo Nordisk Foundation grant NNF20OC0063985. In addition, the study is supported by The Lundbeck Foundation through a personal grant to author JB. Drug expenses are covered by the participating centres’ departmental budget. Drug expenses beyond the normal department budget is also be covered by the participating centres.

For peer review only

**Authors contribution**

**JB:** Substantial contributions to the conception and design of the work as well as the acquisition, analysis, and interpretation of data for the work; AND

Drafting the work; AND

Final approval of the version to be published; AND

Agreement to be accountable for all aspects of the work in ensuring that questions related to the accuracy or integrity of any part of the work are appropriately investigated and resolved.

**TA:** Substantial contributions to the conception and design of the work as well as the acquisition, analysis, and interpretation of data for the work; AND

Drafting the work; AND

Final approval of the version to be published; AND

Agreement to be accountable for all aspects of the work in ensuring that questions related to the accuracy or integrity of any part of the work are appropriately investigated and resolved.

**VS:** Substantial contributions to the conception and design of the work as well as the acquisition, analysis, and interpretation of data for the work; AND

Drafting the work; AND

Final approval of the version to be published; AND

Agreement to be accountable for all aspects of the work in ensuring that questions related to the accuracy or integrity of any part of the work are appropriately investigated and resolved.

**JH:** Substantial contributions to the conception, analysis and interpretation of data for the work; AND

Revising it critically for important intellectual content; AND

Final approval of the version to be published; AND

Agreement to be accountable for all aspects of the work in ensuring that questions related to the accuracy or integrity of any part of the work are appropriately investigated and resolved.

**SY:** Substantial contributions to the conception, analysis and interpretation of data for the work; AND

Revising it critically for important intellectual content; AND

Final approval of the version to be published; AND

Agreement to be accountable for all aspects of the work in ensuring that questions related to the accuracy or integrity of any part of the work are appropriately investigated and resolved.

**MK:** Substantial contributions to the conception, analysis and interpretation of data for the work; AND

Revising it critically for important intellectual content; AND

Final approval of the version to be published; AND

Agreement to be accountable for all aspects of the work in ensuring that questions related to the accuracy or integrity of any part of the work are appropriately investigated and resolved.

**MVV:** Substantial contributions to the conception, analysis and interpretation of data for the work; AND

Revising it critically for important intellectual content; AND

Final approval of the version to be published; AND

Agreement to be accountable for all aspects of the work in ensuring that questions related to the accuracy or integrity of any part of the work are appropriately investigated and resolved.

**EVL:** Substantial contributions to the conception, analysis and interpretation of data for the work; AND

Revising it critically for important intellectual content; AND

Final approval of the version to be published; AND

1  
2  
3  
4 Agreement to be accountable for all aspects of the work in ensuring that questions related to the accuracy or integrity  
5 of any part of the work are appropriately investigated and resolved.  
6

7 **SM:** Substantial contributions to the conception, analysis and interpretation of data for the work; AND  
8 Revising it critically for important intellectual content; AND  
9 Final approval of the version to be published; AND

10 Agreement to be accountable for all aspects of the work in ensuring that questions related to the accuracy or integrity  
11 of any part of the work are appropriately investigated and resolved.  
12

13  
14 **STZ:** Substantial contributions to the conception, analysis and interpretation of data for the work; AND  
15 Revising it critically for important intellectual content; AND  
16 Final approval of the version to be published; AND

17 Agreement to be accountable for all aspects of the work in ensuring that questions related to the accuracy or integrity  
18 of any part of the work are appropriately investigated and resolved.  
19

20  
21 **MAS:** Substantial contributions to the conception, analysis and interpretation of data for the work; AND  
22 Revising it critically for important intellectual content; AND  
23 Final approval of the version to be published; AND

24 Agreement to be accountable for all aspects of the work in ensuring that questions related to the accuracy or integrity  
25 of any part of the work are appropriately investigated and resolved.  
26

27 **CFE:** Substantial contributions to the conception, analysis and interpretation of data for the work; AND  
28 Revising it critically for important intellectual content; AND  
29 Final approval of the version to be published; AND

30 Agreement to be accountable for all aspects of the work in ensuring that questions related to the accuracy or integrity  
31 of any part of the work are appropriately investigated and resolved.  
32

33  
34 **DLI:** Substantial contributions to the conception and design of the work as well as the acquisition, analysis, and  
35 interpretation of data for the work; AND  
36 Drafting the work; AND

37 Final approval of the version to be published; AND

38 Agreement to be accountable for all aspects of the work in ensuring that questions related to the accuracy or integrity  
39 of any part of the work are appropriately investigated and resolved.  
40

41  
42 **LSR:** Substantial contributions to the conception and design of the work as well as the acquisition, analysis, and  
43 interpretation of data for the work; AND  
44 Drafting the work; AND

45 Final approval of the version to be published; AND

46 Agreement to be accountable for all aspects of the work in ensuring that questions related to the accuracy or integrity  
47 of any part of the work are appropriately investigated and resolved.  
48

49  
50 **JS:** Substantial contributions to the conception and design of the work as well as the acquisition, analysis, and  
51 interpretation of data for the work; AND  
52 Drafting the work; AND

53 Final approval of the version to be published; AND

54 Agreement to be accountable for all aspects of the work in ensuring that questions related to the accuracy or integrity  
55 of any part of the work are appropriately investigated and resolved.  
56  
57  
58  
59  
60

1  
2  
3  
4  
5  
6  
7  
8  
9  
10  
11  
12  
13  
14  
15  
16  
17  
18  
19  
20  
21  
22  
23  
24  
25  
26  
27  
28  
29  
30  
31  
32  
33  
34  
35  
36  
37  
38  
39  
40  
41  
42  
43  
44  
45  
46  
47  
48  
49  
50  
51  
52  
53  
54  
55  
56  
57  
58  
59  
60

**Conflicts of interest:** None

For peer review only

## REFERENCES

- 1 American College of Surgeons. *ATLS: Advanced Trauma Life Support for Doctors (Student Course Manual)*, 10th edition.
- 2 Hale KE, Gavin C, O'Driscoll BR. Audit of oxygen use in emergency ambulances and in a hospital emergency department. *Emerg Med J* 2008;**25**:773–6. doi:10.1136/emj.2008.059287
- 3 McMullan J, Rodriquez D, Hart KW, *et al*. Prevalence of prehospital hypoxemia and oxygen use in trauma patients. *Mil Med* 2013;**178**:1121–5. doi:10.7205/MILMED-D-13-00126
- 4 Leitch P, Hudson AL, Griggs JE, *et al*. Incidence of hyperoxia in trauma patients receiving pre-hospital emergency anaesthesia: results of a 5-year retrospective analysis. *Scand J Trauma Resusc Emerg Med* 2021;**29**:134. doi:10.1186/s13049-021-00951-w
- 5 Boyle M, Wong J. Prescribing oxygen therapy. An audit of oxygen prescribing practices on medical wards at North Shore Hospital, Auckland, New Zealand. *N Z Med J* 2006;**119**:U2080.
- 6 Eskesen TG, Baekgaard JS, Steinmetz J, *et al*. Initial use of supplementary oxygen for trauma patients: a systematic review. *BMJ Open* 2018;**8**:e020880. doi:10.1136/bmjopen-2017-020880
- 7 Christensen MA, Steinmetz J, Velmahos G, *et al*. Supplemental oxygen therapy in trauma patients: An exploratory registry-based study. *Acta Anaesthesiol Scand* 2021;**65**:967–78. doi:10.1111/aas.13829
- 8 Chu DK, Kim LH-Y, Young PJ, *et al*. Mortality and morbidity in acutely ill adults treated with liberal versus conservative oxygen therapy (IOTA): a systematic review and meta-analysis. *Lancet Lond Engl* 2018;**391**:1693–705. doi:10.1016/S0140-6736(18)30479-3
- 9 Taher A, Pilehvari Z, Poorolajal J, *et al*. Effects of Normobaric Hyperoxia in Traumatic Brain Injury: A Randomized Controlled Clinical Trial. *Trauma Mon* 2016;**21**:e26772. doi:10.5812/traumamon.26772
- 10 Eskesen TG, Baekgaard JS, Christensen RE, *et al*. Supplemental oxygen and hyperoxemia in trauma patients: A prospective, observational study. *Acta Anaesthesiol Scand* Published Online First: 6 December 2018. doi:10.1111/aas.13301
- 11 Suzuki S, Eastwood GM, Peck L, *et al*. Current oxygen management in mechanically ventilated patients: a prospective observational cohort study. *J Crit Care* 2013;**28**:647–54. doi:10.1016/j.jcrrc.2013.03.010
- 12 Helmerhorst HJF, Schultz MJ, van der Voort PHJ, *et al*. Effectiveness and Clinical Outcomes of a Two-Step Implementation of Conservative Oxygenation Targets in Critically Ill Patients: A Before and After Trial. *Crit Care Med* 2016;**44**:554–63. doi:10.1097/CCM.0000000000001461
- 13 Staehr-Rye AK, Meyhoff CS, Scheffenbichler FT, *et al*. High intraoperative inspiratory oxygen fraction and risk of major respiratory complications. *BJA Br J Anaesth* 2017;**119**:140–9. doi:10.1093/bja/aex128
- 14 Six S, Jaffal K, Ledoux G, *et al*. Hyperoxemia as a risk factor for ventilator-associated pneumonia. *Crit Care Lond Engl* 2016;**20**:195. doi:10.1186/s13054-016-1368-4
- 15 Allegranzi B, Zayed B, Bischoff P, *et al*. New WHO recommendations on intraoperative and postoperative measures for surgical site infection prevention: an evidence-based global perspective. *Lancet Infect Dis* 2016;**16**:e288–303. doi:10.1016/S1473-3099(16)30402-9
- 16 Meyhoff CS, Wetterslev J, Jorgensen LN, *et al*. Effect of high perioperative oxygen fraction on surgical site infection and pulmonary complications after abdominal surgery: the PROXI randomized clinical trial. *JAMA* 2009;**302**:1543–50. doi:10.1001/jama.2009.1452

- 17 Eastwood G, Bellomo R, Bailey M, *et al.* Arterial oxygen tension and mortality in mechanically ventilated patients. *Intensive Care Med* 2012;**38**:91–8. doi:10.1007/s00134-011-2419-6
- 18 Helmerhorst HJF, Arts DL, Schultz MJ, *et al.* Metrics of Arterial Hyperoxia and Associated Outcomes in Critical Care. *Crit Care Med* 2017;**45**:187–95. doi:10.1097/CCM.0000000000002084
- 19 Schjørring OL, Klitgaard TL, Perner A, *et al.* Lower or Higher Oxygenation Targets for Acute Hypoxemic Respiratory Failure. *N Engl J Med* Published Online First: 20 January 2021. doi:10.1056/NEJMoa2032510
- 20 Baekgaard JS, Isbye D, Ottosen CI, *et al.* Restrictive vs liberal oxygen for trauma patients-the TRAUMOX1 pilot randomised clinical trial. *Acta Anaesthesiol Scand*; **63**:947–55. doi:10.1111/aas.13362
- 21 Chan A-W, Tetzlaff JM, Altman DG, *et al.* SPIRIT 2013 statement: defining standard protocol items for clinical trials. *Ann Intern Med* 2013;**158**:200–7. doi:10.7326/0003-4819-158-3-201302050-00583
- 22 Xu RH, Keetharuth AD, Wang L-L, *et al.* Measuring health-related quality of life and well-being: a head-to-head psychometric comparison of the EQ-5D-5L, ReQoL-UI and ICECAP-A. *Eur J Health Econ HEPAC Health Econ Prev Care* 2022;**23**:165–76. doi:10.1007/s10198-021-01359-0
- 23 Wilson JT, Pettigrew LE, Teasdale GM. Structured interviews for the Glasgow Outcome Scale and the extended Glasgow Outcome Scale: guidelines for their use. *J Neurotrauma* 1998;**15**:573–85. doi:10.1089/neu.1998.15.573
- 24 Harris PA, Taylor R, Thielke R, *et al.* Research electronic data capture (REDCap)—A metadata-driven methodology and workflow process for providing translational research informatics support. *J Biomed Inform* 2009;**42**:377–81. doi:10.1016/j.jbi.2008.08.010
- 25 Pneumonia (Ventilator-associated [VAP] and non-ventilator-associated Pneumonia [PNEU]) Event. <https://www.cdc.gov/nhsn/pdfs/pscmanual/6pscvapcurrent.pdf>
- 26 ARDS Definition Task Force, Ranieri VM, Rubenfeld GD, *et al.* Acute respiratory distress syndrome: the Berlin Definition. *JAMA* 2012;**307**:2526–33. doi:10.1001/jama.2012.5669
- 27 Savitsky B, Givon A, Rozenfeld M, *et al.* Traumatic brain injury: It is all about definition. *Brain Inj* 2016;**30**:1194–200. doi:10.1080/02699052.2016.1187290
- 28 Demetriades D, Murray J, Charalambides K, *et al.* Trauma fatalities: time and location of hospital deaths. *J Am Coll Surg* 2004;**198**:20–6. doi:10.1016/j.jamcollsurg.2003.09.003
- 29 Mallinckrodt CH, Lin Q, Molenberghs M. A structured framework for assessing sensitivity to missing data assumptions in longitudinal clinical trials. *Pharm Stat* 2013;**12**:1–6. doi:10.1002/pst.1547
- 30 Cook D, Lauzier F, Rocha MG, *et al.* Serious adverse events in academic critical care research. *CMAJ Can Med Assoc J J Assoc Medicale Can* 2008;**178**:1181–4. doi:10.1503/cmaj.071366
- 31 WMA - The World Medical Association-WMA Declaration of Helsinki – Ethical Principles for Medical Research Involving Human Subjects. <https://www.wma.net/policies-post/wma-declaration-of-helsinki-ethical-principles-for-medical-research-involving-human-subjects/> (accessed 25 Jan 2022).
- 32 Mosby. *PHTLS. Basic and Advanced Prehospital Trauma Life Support*. 5 edn.
- 33 Stockinger ZT, Mcswain NE. Prehospital supplemental oxygen in trauma patients: its efficacy and implications for military medical care. *Mil Med* 2004;**169**:609–12. doi:10.7205/milmed.169.8.609
- 34 Hansen TE, Christensen RE, Baekgaard J, *et al.* Supplemental oxygen for traumatic brain injury: A systematic review. *Acta Anaesthesiol Scand* Published Online First: 14 December 2021. doi:10.1111/aas.14019

- 1  
2  
3  
4 35 O'Driscoll BR, Howard LS, Earis J, *et al.* BTS guideline for oxygen use in adults in healthcare and emergency  
5 settings. *Thorax* 2017;**72**:ii1–90. doi:10.1136/thoraxjnl-2016-209729  
6
- 7 36 Roffe C, Nevatte T, Sim J, *et al.* Effect of Routine Low-Dose Oxygen Supplementation on Death and Disability in  
8 Adults With Acute Stroke: The Stroke Oxygen Study Randomized Clinical Trial. *JAMA* 2017;**318**:1125–35.  
9 doi:10.1001/jama.2017.11463  
10
- 11 37 Stub Dion, Smith Karen, Bernard Stephen, *et al.* Air Versus Oxygen in ST-Segment–Elevation Myocardial  
12 Infarction. *Circulation* 2015;**131**:2143–50. doi:10.1161/CIRCULATIONAHA.114.014494  
13
- 14 38 Durlinger EMJ, Spoelstra-de Man AME, Smit B, *et al.* Hyperoxia: At what level of SpO<sub>2</sub> is a patient safe? A study in  
15 mechanically ventilated ICU patients. *J Crit Care* 2017;**39**:199–204. doi:10.1016/j.jcrc.2017.02.031  
16
- 17 39 Baekgaard J, Siersma V, Christensen RE, *et al.* A high fraction of inspired oxygen may increase mortality in  
18 intubated trauma patients - A retrospective cohort study. *Injury* 2022;**53**:190–7. doi:10.1016/j.injury.2021.09.015  
19
- 20 40 Meyhoff CS, Jorgensen LN, Wetterslev J, *et al.* Increased long-term mortality after a high perioperative inspiratory  
21 oxygen fraction during abdominal surgery: follow-up of a randomized clinical trial. *Anesth Analg* 2012;**115**:849–  
22 54. doi:10.1213/ANE.0b013e3182652a51  
23
- 24 41 Dijkink S, Krijnen P, Hage A, *et al.* Differences in Characteristics and Outcome of Patients with Penetrating Injuries  
25 in the USA and the Netherlands: A Multi-institutional Comparison. *World J Surg* 2018;**42**:3608–15.  
26 doi:10.1007/s00268-018-4669-8  
27
- 28 42 Rincon F, Kang J, Vibbert M, *et al.* Significance of arterial hyperoxia and relationship with case fatality in traumatic  
29 brain injury: a multicentre cohort study. *J Neurol Neurosurg Psychiatry* 2014;**85**:799–805. doi:10.1136/jnnp-2013-  
30 305505  
31
- 32 43 WHO | Injuries and violence: the facts. [http://www.who.int/violence\\_injury\\_prevention/key\\_facts/en/](http://www.who.int/violence_injury_prevention/key_facts/en/) (accessed  
33 11 Aug 2017).  
34
- 35 44 Hyllienmark P, Brattström O, Larsson E, *et al.* High incidence of post-injury pneumonia in intensive care-treated  
36 trauma patients. *Acta Anaesthesiol Scand* 2013;**57**:848–54. doi:10.1111/aas.12111  
37
- 38 45 Rodriguez JL, Gibbons KJ, Bitzer LG, *et al.* Pneumonia: incidence, risk factors, and outcome in injured patients. *J*  
39 *Trauma* 1991;**31**:907–12; discussion 912-914.  
40
- 41 46 Cost of Injury & Calculators | WISQARS | Injury Center | CDC.  
42 2018.<https://www.cdc.gov/injury/wisqars/cost/index.html> (accessed 10 May 2019).  
43  
44  
45  
46  
47  
48  
49  
50  
51  
52  
53  
54  
55  
56  
57  
58  
59  
60



1  
2  
3  
4  
5  
6  
7  
8  
9  
10  
11  
12  
13  
14  
15  
16  
17  
18  
19  
20  
21  
22  
23  
24  
25  
26  
27  
28  
29  
30  
31  
32  
33  
34  
35  
36  
37  
38  
39  
40  
41

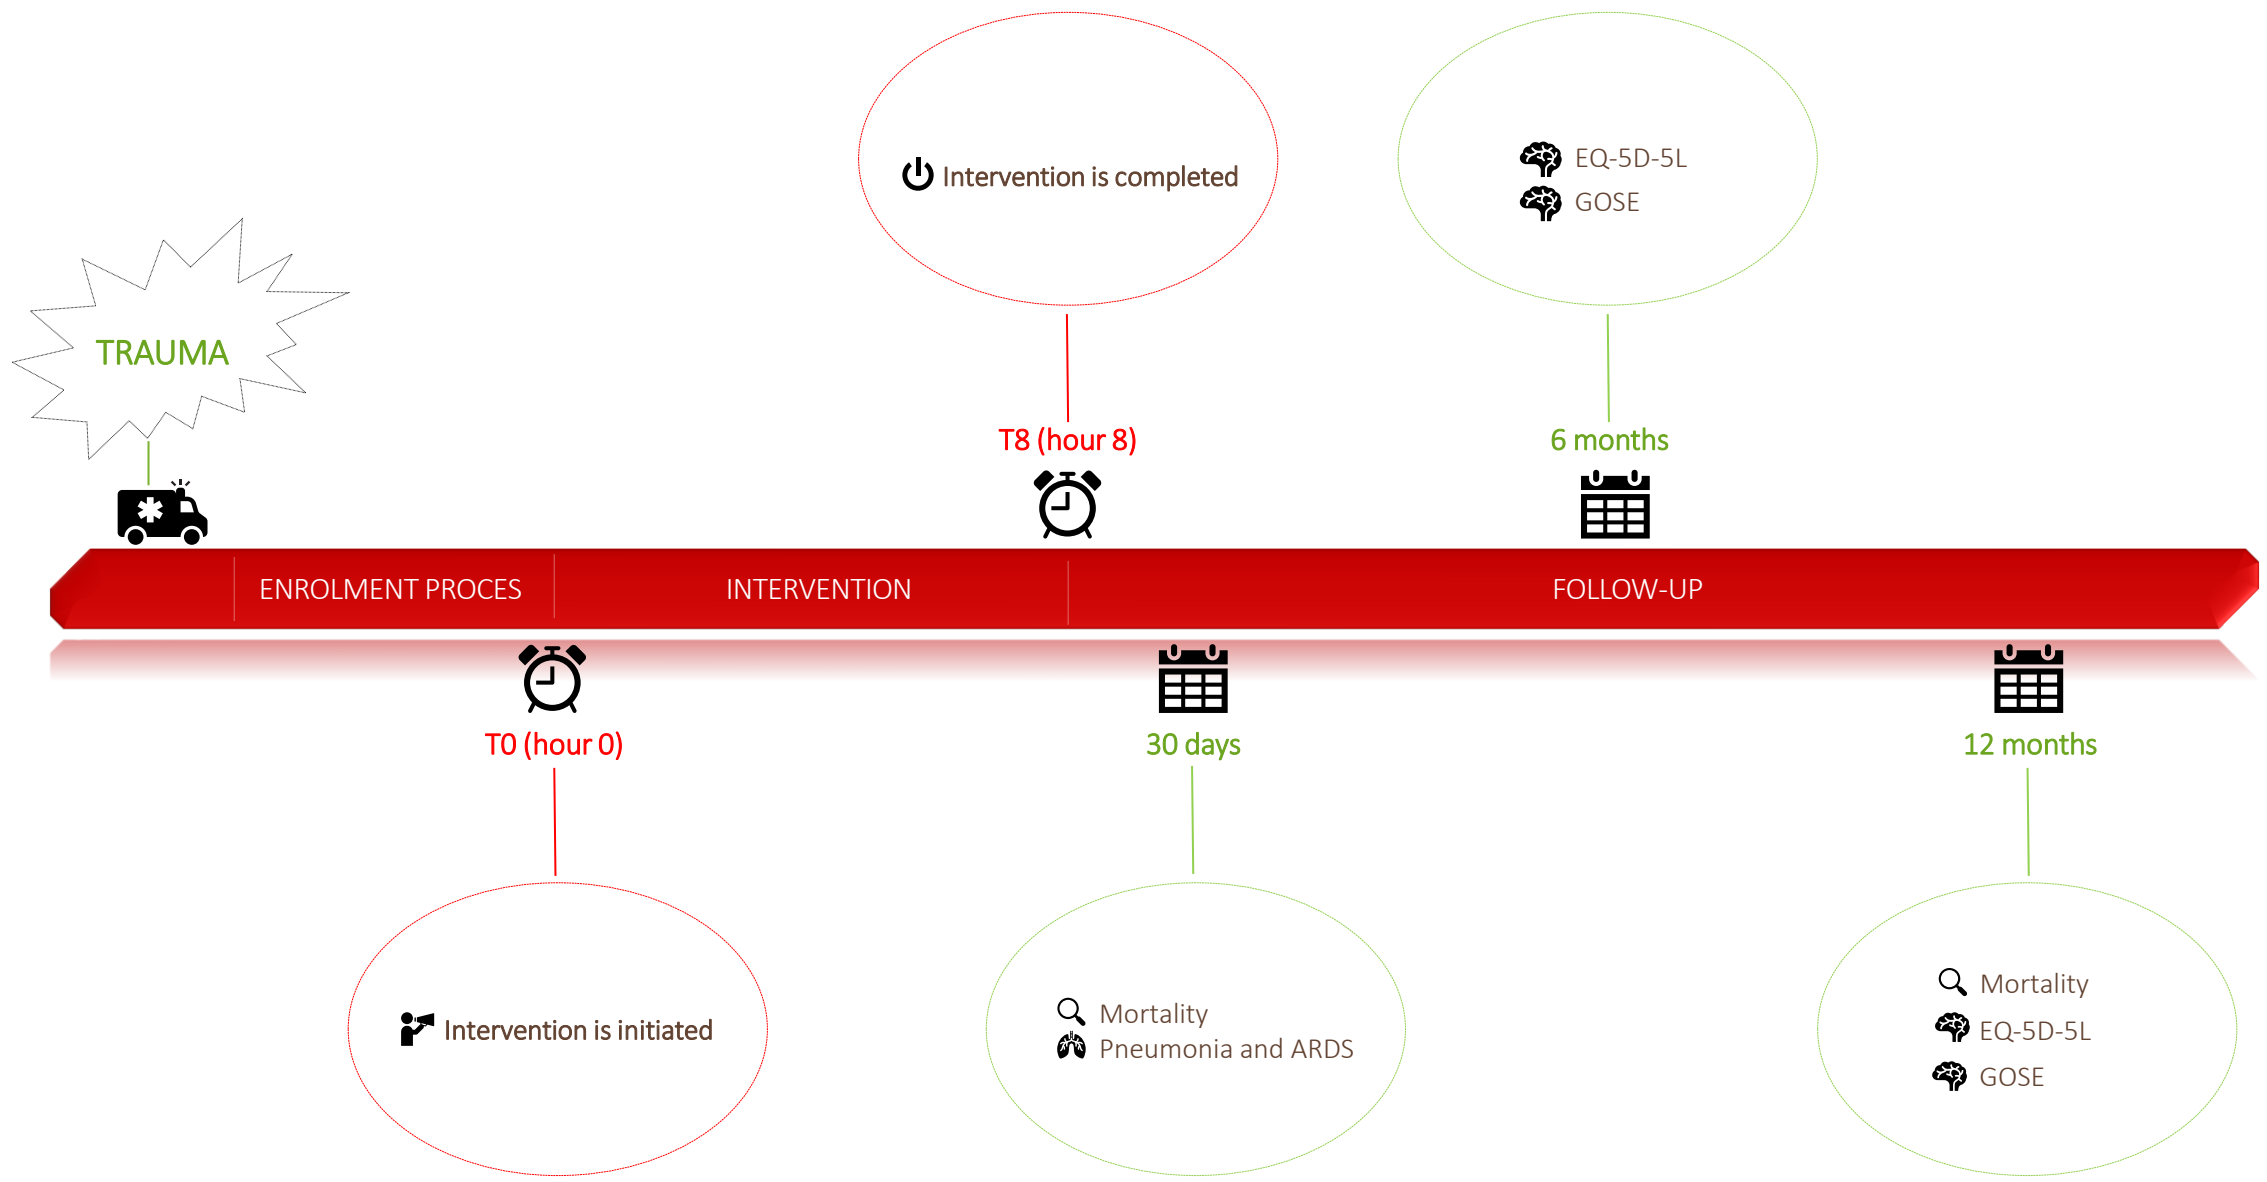

|                                                                                                                                                                                                                                            |                                                                                                                                                                                                                                                                                                                                                                                                                                                                                                                                                                                                                                                                                                                                                                                                                                                                                                                                                                                                                                                                                                                                                                                                                                                                                                                                                                                                                                                                                                                                 |
|--------------------------------------------------------------------------------------------------------------------------------------------------------------------------------------------------------------------------------------------|---------------------------------------------------------------------------------------------------------------------------------------------------------------------------------------------------------------------------------------------------------------------------------------------------------------------------------------------------------------------------------------------------------------------------------------------------------------------------------------------------------------------------------------------------------------------------------------------------------------------------------------------------------------------------------------------------------------------------------------------------------------------------------------------------------------------------------------------------------------------------------------------------------------------------------------------------------------------------------------------------------------------------------------------------------------------------------------------------------------------------------------------------------------------------------------------------------------------------------------------------------------------------------------------------------------------------------------------------------------------------------------------------------------------------------------------------------------------------------------------------------------------------------|
| <p>1<br/>2<br/>3<br/>4<br/>5<br/>6<br/>7<br/>8<br/>9<br/>10<br/>11<br/>12<br/>13<br/>14<br/>15<br/>16<br/>17<br/>18<br/>19<br/>20<br/>21<br/>22<br/>23<br/>24<br/>25<br/>26<br/>27<br/>28<br/>29<br/>30<br/>31</p> <p><b>Pneumonia</b></p> | <p>Two or more serial chest imaging test results with at least one of the following:</p> <ul style="list-style-type: none"> <li>- New and persistent OR progressive and persistent infiltrate/consolidation/cavitation</li> </ul> <p>Symptoms/laboratory:</p> <p>At least one of the following:</p> <ul style="list-style-type: none"> <li>- Temperature <math>\geq 38,5^{\circ}\text{C}</math></li> <li>- Leukopenia (<math>\leq 4000 \text{ WBC}/\text{mm}^3</math>) or leukocytosis (<math>&gt;12,000 \text{ WBC}/\text{mm}^3</math>)</li> <li>- For adults <math>&gt;70</math> years old, altered mental status with no other recognized cause</li> </ul> <p>And at least two of the following:</p> <ul style="list-style-type: none"> <li>- New onset of purulent sputum or change in character of sputum, or increased respiratory secretions, or increased suctioning requirements</li> <li>- New onset or worsening cough, or dyspnea, or tachypnea</li> <li>- Rales or bronchial breath sounds</li> <li>- Worsening gas exchange (e.g., <math>\text{O}_2</math> desaturations (e.g., <math>\text{PaO}_2/\text{FiO}_2 &lt; 240 \text{ mmHg}</math>) increased oxygen requirements, or increased ventilator demand)</li> </ul> <p>Ventilator-associated pneumonia (VAP): A pneumonia where the patient is on mechanical ventilation for <math>&gt;2</math> calendar days on the date of event, with day of ventilator placement being Day 1, AND the ventilator was in place on the date of event or the day before.</p> |
| <p>32<br/>33<br/>34<br/>35<br/>36<br/>37<br/>38<br/>39<br/>40<br/>41<br/>42<br/>43<br/>44<br/>45<br/>46<br/>47<br/>48<br/>49<br/>50<br/>51<br/>52<br/>53<br/>54<br/>55<br/>56<br/>57<br/>58<br/>59<br/>60</p> <p><b>ARDS</b></p>           | <p>Berlin definition:</p> <p><i>Acute diffuse, inflammatory lung injury, leading to increased pulmonary vascular permeability, increased lung weight, and loss of aerated lung tissue...[with] hypoexemia and bilateral radiographic opacities associated with increased venous admixture, increased physiological dead space and decreased lung compliance.</i></p> <ol style="list-style-type: none"> <li>1. <i>acute, meaning onset over 1 week or less</i></li> <li>2. <i>bilateral opacities consistent with pulmonary edema must be present and may be detected on CT or chest radiograph</i></li> <li>3. <i>Oxygenation difficulties are classified as mild, moderate or severe ARDS:</i><br/> <i>mild: <math>200 \text{ mmHg} &lt; \text{PaO}_2/\text{FiO}_2 \leq 300 \text{ mHg}</math> with <math>\text{PEEP}/\text{CPAP} \geq 5 \text{ cm H}_2\text{O}</math></i><br/> <i>moderate: <math>100 \text{ mmHg} &lt; \text{PaO}_2/\text{FiO}_2 \leq 200 \text{ mHg}</math> with <math>\text{PEEP} \geq 5 \text{ cm H}_2\text{O}</math></i><br/> <i>severe: <math>\text{PaO}_2/\text{FiO}_2 \leq 100 \text{ mHg}</math> with <math>\text{PEEP} \geq 5 \text{ cm H}_2\text{O}</math></i></li> </ol>                                                                                                                                                                                                                                                                                                                         |

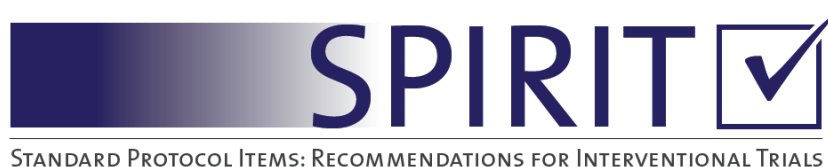

STANDARD PROTOCOL ITEMS: RECOMMENDATIONS FOR INTERVENTIONAL TRIALS

SPIRIT 2013 Checklist: Recommended items to address in a clinical trial protocol and related documents\*

| Section/item                      | Item No | Description                                                                                                                                                                                                                                                                              |
|-----------------------------------|---------|------------------------------------------------------------------------------------------------------------------------------------------------------------------------------------------------------------------------------------------------------------------------------------------|
| <b>Administrative information</b> |         |                                                                                                                                                                                                                                                                                          |
| Title                             | ✓ 1     | Descriptive title identifying the study design, population, interventions, and, if applicable, trial acronym                                                                                                                                                                             |
| Trial registration                | ✓ 2a    | Trial identifier and registry name. If not yet registered, name of intended registry                                                                                                                                                                                                     |
|                                   | ✓ 2b    | All items from the World Health Organization Trial Registration Data Set                                                                                                                                                                                                                 |
| Protocol version                  | ✓ 3     | Date and version identifier                                                                                                                                                                                                                                                              |
| Funding                           | ✓ 4     | Sources and types of financial, material, and other support                                                                                                                                                                                                                              |
| Roles and responsibilities        | ✓ 5a    | Names, affiliations, and roles of protocol contributors                                                                                                                                                                                                                                  |
|                                   | ✓ 5b    | Name and contact information for the trial sponsor                                                                                                                                                                                                                                       |
|                                   | ✓ 5c    | Role of study sponsor and funders, if any, in study design; collection, management, analysis, and interpretation of data; writing of the report; and the decision to submit the report for publication, including whether they will have ultimate authority over any of these activities |
|                                   | ✓ 5d    | Composition, roles, and responsibilities of the coordinating centre, steering committee, endpoint adjudication committee, data management team, and other individuals or groups overseeing the trial, if applicable (see Item 21a for data monitoring committee)                         |
| <b>Introduction</b>               |         |                                                                                                                                                                                                                                                                                          |
| Background and rationale          | ✓ 6a    | Description of research question and justification for undertaking the trial, including summary of relevant studies (published and unpublished) examining benefits and harms for each intervention                                                                                       |
|                                   | ✓ 6b    | Explanation for choice of comparators                                                                                                                                                                                                                                                    |
| Objectives                        | ✓ 7     | Specific objectives or hypotheses                                                                                                                                                                                                                                                        |
| Trial design                      | ✓ 8     | Description of trial design including type of trial (eg, parallel group, crossover, factorial, single group), allocation ratio, and framework (eg, superiority, equivalence, noninferiority, exploratory)                                                                                |

## Methods: Participants, interventions, and outcomes

|                      |       |                                                                                                                                                                                                                                                                                                                                                                                |
|----------------------|-------|--------------------------------------------------------------------------------------------------------------------------------------------------------------------------------------------------------------------------------------------------------------------------------------------------------------------------------------------------------------------------------|
| Study setting        | ✓ 9   | Description of study settings (eg, community clinic, academic hospital) and list of countries where data will be collected. Reference to where list of study sites can be obtained                                                                                                                                                                                             |
| Eligibility criteria | ✓ 10  | Inclusion and exclusion criteria for participants. If applicable, eligibility criteria for study centres and individuals who will perform the interventions (eg, surgeons, psychotherapists)                                                                                                                                                                                   |
| Interventions        | ✓ 11a | Interventions for each group with sufficient detail to allow replication, including how and when they will be administered                                                                                                                                                                                                                                                     |
|                      | ✓ 11b | Criteria for discontinuing or modifying allocated interventions for a given trial participant (eg, drug dose change in response to harms, participant request, or improving/worsening disease)                                                                                                                                                                                 |
|                      | ✓ 11c | Strategies to improve adherence to intervention protocols, and any procedures for monitoring adherence (eg, drug tablet return, laboratory tests)                                                                                                                                                                                                                              |
|                      | ✓ 11d | Relevant concomitant care and interventions that are permitted or prohibited during the trial                                                                                                                                                                                                                                                                                  |
| Outcomes             | ✓ 12  | Primary, secondary, and other outcomes, including the specific measurement variable (eg, systolic blood pressure), analysis metric (eg, change from baseline, final value, time to event), method of aggregation (eg, median, proportion), and time point for each outcome. Explanation of the clinical relevance of chosen efficacy and harm outcomes is strongly recommended |
| Participant timeline | ✓ 13  | Time schedule of enrolment, interventions (including any run-ins and washouts), assessments, and visits for participants. A schematic diagram is highly recommended (see Figure)                                                                                                                                                                                               |
| Sample size          | ✓ 14  | Estimated number of participants needed to achieve study objectives and how it was determined, including clinical and statistical assumptions supporting any sample size calculations                                                                                                                                                                                          |
| Recruitment          | ✓ 15  | Strategies for achieving adequate participant enrolment to reach target sample size                                                                                                                                                                                                                                                                                            |

## Methods: Assignment of interventions (for controlled trials)

### Allocation:

|                     |       |                                                                                                                                                                                                                                                                                                                                                          |
|---------------------|-------|----------------------------------------------------------------------------------------------------------------------------------------------------------------------------------------------------------------------------------------------------------------------------------------------------------------------------------------------------------|
| Sequence generation | ✓ 16a | Method of generating the allocation sequence (eg, computer-generated random numbers), and list of any factors for stratification. To reduce predictability of a random sequence, details of any planned restriction (eg, blocking) should be provided in a separate document that is unavailable to those who enrol participants or assign interventions |
|---------------------|-------|----------------------------------------------------------------------------------------------------------------------------------------------------------------------------------------------------------------------------------------------------------------------------------------------------------------------------------------------------------|

|    |                |       |                                                                         |
|----|----------------|-------|-------------------------------------------------------------------------|
| 1  |                |       |                                                                         |
| 2  | Allocation     | ✓ 16b | Mechanism of implementing the allocation sequence (eg, central          |
| 3  | concealment    |       | telephone; sequentially numbered, opaque, sealed envelopes),            |
| 4  | mechanism      |       | describing any steps to conceal the sequence until interventions are    |
| 5  |                |       | assigned                                                                |
| 6  |                |       |                                                                         |
| 7  | Implementation | ✓ 16c | Who will generate the allocation sequence, who will enrol participants, |
| 8  |                |       | and who will assign participants to interventions                       |
| 9  |                |       |                                                                         |
| 10 | Blinding       | ✓ 17a | Who will be blinded after assignment to interventions (eg, trial        |
| 11 | (masking)      |       | participants, care providers, outcome assessors, data analysts), and    |
| 12 |                |       | how                                                                     |
| 13 |                | ✓ 17b | If blinded, circumstances under which unblinding is permissible, and    |
| 14 |                |       | procedure for revealing a participant's allocated intervention during   |
| 15 |                |       | the trial                                                               |
| 16 |                |       |                                                                         |
| 17 |                |       |                                                                         |
| 18 |                |       |                                                                         |
| 19 |                |       |                                                                         |

### Methods: Data collection, management, and analysis

|    |                 |       |                                                                          |
|----|-----------------|-------|--------------------------------------------------------------------------|
| 21 |                 |       |                                                                          |
| 22 | Data collection | ✓ 18a | Plans for assessment and collection of outcome, baseline, and other      |
| 23 | methods         |       | trial data, including any related processes to promote data quality (eg, |
| 24 |                 |       | duplicate measurements, training of assessors) and a description of      |
| 25 |                 |       | study instruments (eg, questionnaires, laboratory tests) along with      |
| 26 |                 |       | their reliability and validity, if known. Reference to where data        |
| 27 |                 |       | collection forms can be found, if not in the protocol                    |
| 28 |                 |       |                                                                          |
| 29 |                 | ✓ 18b | Plans to promote participant retention and complete follow-up,           |
| 30 |                 |       | including list of any outcome data to be collected for participants who  |
| 31 |                 |       | discontinue or deviate from intervention protocols                       |
| 32 |                 |       |                                                                          |
| 33 |                 |       |                                                                          |
| 34 | Data            | ✓ 19  | Plans for data entry, coding, security, and storage, including any       |
| 35 | management      |       | related processes to promote data quality (eg, double data entry;        |
| 36 |                 |       | range checks for data values). Reference to where details of data        |
| 37 |                 |       | management procedures can be found, if not in the protocol               |
| 38 |                 |       |                                                                          |
| 39 |                 |       |                                                                          |
| 40 | Statistical     | ✓ 20a | Statistical methods for analysing primary and secondary outcomes.        |
| 41 | methods         |       | Reference to where other details of the statistical analysis plan can be |
| 42 |                 |       | found, if not in the protocol                                            |
| 43 |                 |       |                                                                          |
| 44 |                 | ✓ 20b | Methods for any additional analyses (eg, subgroup and adjusted           |
| 45 |                 |       | analyses)                                                                |
| 46 |                 |       |                                                                          |
| 47 |                 | ✓ 20c | Definition of analysis population relating to protocol non-adherence     |
| 48 |                 |       | (eg, as randomised analysis), and any statistical methods to handle      |
| 49 |                 |       | missing data (eg, multiple imputation)                                   |
| 50 |                 |       |                                                                          |
| 51 |                 |       |                                                                          |

### Methods: Monitoring

|    |                 |       |                                                                      |
|----|-----------------|-------|----------------------------------------------------------------------|
| 52 |                 |       |                                                                      |
| 53 |                 |       |                                                                      |
| 54 | Data monitoring | ✓ 21a | Composition of data monitoring committee (DMC); summary of its role  |
| 55 |                 |       | and reporting structure; statement of whether it is independent from |
| 56 |                 |       | the sponsor and competing interests; and reference to where further  |
| 57 |                 |       | details about its charter can be found, if not in the protocol.      |
| 58 |                 |       | Alternatively, an explanation of why a DMC is not needed             |
| 59 |                 |       |                                                                      |
| 60 |                 |       |                                                                      |

|    |          |       |                                                                        |
|----|----------|-------|------------------------------------------------------------------------|
| 1  |          |       |                                                                        |
| 2  |          | ✓ 21b | Description of any interim analyses and stopping guidelines, including |
| 3  |          |       | who will have access to these interim results and make the final       |
| 4  |          |       | decision to terminate the trial                                        |
| 5  |          |       |                                                                        |
| 6  | Harms    | ✓ 22  | Plans for collecting, assessing, reporting, and managing solicited and |
| 7  |          |       | spontaneously reported adverse events and other unintended effects     |
| 8  |          |       | of trial interventions or trial conduct                                |
| 9  |          |       |                                                                        |
| 10 | Auditing | ✓ 23  | Frequency and procedures for auditing trial conduct, if any, and       |
| 11 |          |       | whether the process will be independent from investigators and the     |
| 12 |          |       | sponsor                                                                |
| 13 |          |       |                                                                        |
| 14 |          |       |                                                                        |

## Ethics and dissemination

|    |                               |       |                                                                               |
|----|-------------------------------|-------|-------------------------------------------------------------------------------|
| 15 |                               |       |                                                                               |
| 16 |                               |       |                                                                               |
| 17 | Research ethics approval      | ✓ 24  | Plans for seeking research ethics committee/institutional review board        |
| 18 |                               |       | (REC/IRB) approval                                                            |
| 19 |                               |       |                                                                               |
| 20 | Protocol amendments           | ✓ 25  | Plans for communicating important protocol modifications (eg,                 |
| 21 |                               |       | changes to eligibility criteria, outcomes, analyses) to relevant parties      |
| 22 |                               |       | (eg, investigators, REC/IRBs, trial participants, trial registries, journals, |
| 23 |                               |       | regulators)                                                                   |
| 24 |                               |       |                                                                               |
| 25 |                               |       |                                                                               |
| 26 | Consent or assent             | ✓ 26a | Who will obtain informed consent or assent from potential trial               |
| 27 |                               |       | participants or authorised surrogates, and how (see Item 32)                  |
| 28 |                               |       |                                                                               |
| 29 |                               | ✓ 26b | Additional consent provisions for collection and use of participant data      |
| 30 |                               |       | and biological specimens in ancillary studies, if applicable                  |
| 31 |                               |       |                                                                               |
| 32 | Confidentiality               | ✓ 27  | How personal information about potential and enrolled participants will       |
| 33 |                               |       | be collected, shared, and maintained in order to protect confidentiality      |
| 34 |                               |       | before, during, and after the trial                                           |
| 35 |                               |       |                                                                               |
| 36 |                               |       |                                                                               |
| 37 | Declaration of interests      | ✓ 28  | Financial and other competing interests for principal investigators for       |
| 38 |                               |       | the overall trial and each study site                                         |
| 39 |                               |       |                                                                               |
| 40 | Access to data                | ✓ 29  | Statement of who will have access to the final trial dataset, and             |
| 41 |                               |       | disclosure of contractual agreements that limit such access for               |
| 42 |                               |       | investigators                                                                 |
| 43 |                               |       |                                                                               |
| 44 |                               |       |                                                                               |
| 45 | Ancillary and post-trial care | ✓ 30  | Provisions, if any, for ancillary and post-trial care, and for                |
| 46 |                               |       | compensation to those who suffer harm from trial participation                |
| 47 |                               |       |                                                                               |
| 48 | Dissemination policy          | ✓ 31a | Plans for investigators and sponsor to communicate trial results to           |
| 49 |                               |       | participants, healthcare professionals, the public, and other relevant        |
| 50 |                               |       | groups (eg, via publication, reporting in results databases, or other         |
| 51 |                               |       | data sharing arrangements), including any publication restrictions            |
| 52 |                               |       |                                                                               |
| 53 |                               |       |                                                                               |
| 54 |                               | ✓ 31b | Authorship eligibility guidelines and any intended use of professional        |
| 55 |                               |       | writers                                                                       |
| 56 |                               |       |                                                                               |
| 57 |                               | ✓ 31c | Plans, if any, for granting public access to the full protocol, participant-  |
| 58 |                               |       | level dataset, and statistical code                                           |
| 59 |                               |       |                                                                               |
| 60 |                               |       |                                                                               |

## Appendices

|                           |                                                                                                                                                                                                |
|---------------------------|------------------------------------------------------------------------------------------------------------------------------------------------------------------------------------------------|
| Informed consent ✓ 32     | Model consent form and other related documentation given to participants and authorised surrogates                                                                                             |
| Biological specimens ✓ 33 | Plans for collection, laboratory evaluation, and storage of biological specimens for genetic or molecular analysis in the current trial and for future use in ancillary studies, if applicable |

---

\*It is strongly recommended that this checklist be read in conjunction with the SPIRIT 2013 Explanation & Elaboration for important clarification on the items. Amendments to the protocol should be tracked and dated. The SPIRIT checklist is copyrighted by the SPIRIT Group under the Creative Commons "[Attribution-NonCommercial-NoDerivs 3.0 Unported](#)" license.

For peer review only

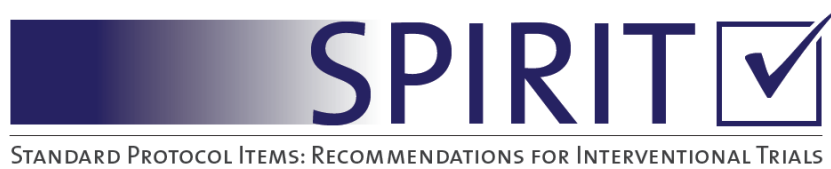

STANDARD PROTOCOL ITEMS: RECOMMENDATIONS FOR INTERVENTIONAL TRIALS

SPIRIT 2013 Checklist: Recommended items to address in a clinical trial protocol and related documents\*

| Section/item                      | Item No | Description                                                                                                                                                                                                                                                                              |
|-----------------------------------|---------|------------------------------------------------------------------------------------------------------------------------------------------------------------------------------------------------------------------------------------------------------------------------------------------|
| <b>Administrative information</b> |         |                                                                                                                                                                                                                                                                                          |
| Title                             | ✓ 1     | Descriptive title identifying the study design, population, interventions, and, if applicable, trial acronym                                                                                                                                                                             |
| Trial registration                | ✓ 2a    | Trial identifier and registry name. If not yet registered, name of intended registry                                                                                                                                                                                                     |
|                                   | ✓ 2b    | All items from the World Health Organization Trial Registration Data Set                                                                                                                                                                                                                 |
| Protocol version                  | ✓ 3     | Date and version identifier                                                                                                                                                                                                                                                              |
| Funding                           | ✓ 4     | Sources and types of financial, material, and other support                                                                                                                                                                                                                              |
| Roles and responsibilities        | ✓ 5a    | Names, affiliations, and roles of protocol contributors                                                                                                                                                                                                                                  |
|                                   | ✓ 5b    | Name and contact information for the trial sponsor                                                                                                                                                                                                                                       |
|                                   | ✓ 5c    | Role of study sponsor and funders, if any, in study design; collection, management, analysis, and interpretation of data; writing of the report; and the decision to submit the report for publication, including whether they will have ultimate authority over any of these activities |
|                                   | ✓ 5d    | Composition, roles, and responsibilities of the coordinating centre, steering committee, endpoint adjudication committee, data management team, and other individuals or groups overseeing the trial, if applicable (see Item 21a for data monitoring committee)                         |
| <b>Introduction</b>               |         |                                                                                                                                                                                                                                                                                          |
| Background and rationale          | ✓ 6a    | Description of research question and justification for undertaking the trial, including summary of relevant studies (published and unpublished) examining benefits and harms for each intervention                                                                                       |
|                                   | ✓ 6b    | Explanation for choice of comparators                                                                                                                                                                                                                                                    |
| Objectives                        | ✓ 7     | Specific objectives or hypotheses                                                                                                                                                                                                                                                        |
| Trial design                      | ✓ 8     | Description of trial design including type of trial (eg, parallel group, crossover, factorial, single group), allocation ratio, and framework (eg, superiority, equivalence, noninferiority, exploratory)                                                                                |



## Methods: Participants, interventions, and outcomes

|                      |       |                                                                                                                                                                                                                                                                                                                                                                                |
|----------------------|-------|--------------------------------------------------------------------------------------------------------------------------------------------------------------------------------------------------------------------------------------------------------------------------------------------------------------------------------------------------------------------------------|
| Study setting        | ✓ 9   | Description of study settings (eg, community clinic, academic hospital) and list of countries where data will be collected. Reference to where list of study sites can be obtained                                                                                                                                                                                             |
| Eligibility criteria | ✓ 10  | Inclusion and exclusion criteria for participants. If applicable, eligibility criteria for study centres and individuals who will perform the interventions (eg, surgeons, psychotherapists)                                                                                                                                                                                   |
| Interventions        | ✓ 11a | Interventions for each group with sufficient detail to allow replication, including how and when they will be administered                                                                                                                                                                                                                                                     |
|                      | ✓ 11b | Criteria for discontinuing or modifying allocated interventions for a given trial participant (eg, drug dose change in response to harms, participant request, or improving/worsening disease)                                                                                                                                                                                 |
|                      | ✓ 11c | Strategies to improve adherence to intervention protocols, and any procedures for monitoring adherence (eg, drug tablet return, laboratory tests)                                                                                                                                                                                                                              |
|                      | ✓ 11d | Relevant concomitant care and interventions that are permitted or prohibited during the trial                                                                                                                                                                                                                                                                                  |
| Outcomes             | ✓ 12  | Primary, secondary, and other outcomes, including the specific measurement variable (eg, systolic blood pressure), analysis metric (eg, change from baseline, final value, time to event), method of aggregation (eg, median, proportion), and time point for each outcome. Explanation of the clinical relevance of chosen efficacy and harm outcomes is strongly recommended |
| Participant timeline | ✓ 13  | Time schedule of enrolment, interventions (including any run-ins and washouts), assessments, and visits for participants. A schematic diagram is highly recommended (see Figure)                                                                                                                                                                                               |
| Sample size          | ✓ 14  | Estimated number of participants needed to achieve study objectives and how it was determined, including clinical and statistical assumptions supporting any sample size calculations                                                                                                                                                                                          |
| Recruitment          | ✓ 15  | Strategies for achieving adequate participant enrolment to reach target sample size                                                                                                                                                                                                                                                                                            |

## Methods: Assignment of interventions (for controlled trials)

### Allocation:

|                     |       |                                                                                                                                                                                                                                                                                                                                                          |
|---------------------|-------|----------------------------------------------------------------------------------------------------------------------------------------------------------------------------------------------------------------------------------------------------------------------------------------------------------------------------------------------------------|
| Sequence generation | ✓ 16a | Method of generating the allocation sequence (eg, computer-generated random numbers), and list of any factors for stratification. To reduce predictability of a random sequence, details of any planned restriction (eg, blocking) should be provided in a separate document that is unavailable to those who enrol participants or assign interventions |
|---------------------|-------|----------------------------------------------------------------------------------------------------------------------------------------------------------------------------------------------------------------------------------------------------------------------------------------------------------------------------------------------------------|

|    |     |                |       |
|----|-----|----------------|-------|
| 1  |     |                |       |
| 2  | 6,7 | Allocation     | ✓ 16b |
| 3  |     | concealment    |       |
| 4  |     | mechanism      |       |
| 5  |     |                |       |
| 6  |     |                |       |
| 7  | 6,7 | Implementation | ✓ 16c |
| 8  |     |                |       |
| 9  |     |                |       |
| 10 |     | Blinding       | ✓ 17a |
| 11 | 6,7 | (masking)      |       |
| 12 |     |                |       |
| 13 |     |                |       |
| 14 |     |                |       |
| 15 | 6,7 |                | ✓ 17b |
| 16 |     |                |       |
| 17 |     |                |       |
| 18 |     |                |       |

### Methods: Data collection, management, and analysis

|    |      |                 |       |
|----|------|-----------------|-------|
| 21 |      |                 |       |
| 22 | 6-9  | Data collection | ✓ 18a |
| 23 |      | methods         |       |
| 24 |      |                 |       |
| 25 |      |                 |       |
| 26 |      |                 |       |
| 27 |      |                 |       |
| 28 |      |                 |       |
| 29 |      |                 |       |
| 30 |      |                 | ✓ 18b |
| 31 |      |                 |       |
| 32 |      |                 |       |
| 33 |      |                 |       |
| 34 | 6-9  | Data            | ✓ 19  |
| 35 |      | management      |       |
| 36 |      |                 |       |
| 37 |      |                 |       |
| 38 |      |                 |       |
| 39 |      |                 |       |
| 40 | 9,10 | Statistical     | ✓ 20a |
| 41 |      | methods         |       |
| 42 |      |                 |       |
| 43 |      |                 |       |
| 44 |      |                 | ✓ 20b |
| 45 |      |                 |       |
| 46 |      |                 |       |
| 47 |      |                 | ✓ 20c |
| 48 |      |                 |       |
| 49 |      |                 |       |
| 50 |      |                 |       |
| 51 |      |                 |       |

### Methods: Monitoring

|    |        |                 |       |
|----|--------|-----------------|-------|
| 52 |        |                 |       |
| 53 |        |                 |       |
| 54 | 10, 11 | Data monitoring | ✓ 21a |
| 55 |        |                 |       |
| 56 |        |                 |       |
| 57 |        |                 |       |
| 58 |        |                 |       |
| 59 |        |                 |       |
| 60 |        |                 |       |

- 1  
2 ✓ 21b Description of any interim analyses and stopping guidelines, including  
3 who will have access to these interim results and make the final  
4 decision to terminate the trial  
5  
6 Harms ✓ 22 Plans for collecting, assessing, reporting, and managing solicited and  
7, 11 spontaneously reported adverse events and other unintended effects  
8 of trial interventions or trial conduct  
9  
10 Auditing ✓ 23 Frequency and procedures for auditing trial conduct, if any, and  
11, 12 whether the process will be independent from investigators and the  
13 sponsor  
14

### 15, 11 Ethics and dissemination

- 16  
17 Research ethics ✓ 24 Plans for seeking research ethics committee/institutional review board  
18 approval (REC/IRB) approval  
19  
20 Protocol ✓ 25 Plans for communicating important protocol modifications (eg,  
21, 11 amendments changes to eligibility criteria, outcomes, analyses) to relevant parties  
22 (eg, investigators, REC/IRBs, trial participants, trial registries, journals,  
23 regulators)  
24  
25 Consent or assent ✓ 26a Who will obtain informed consent or assent from potential trial  
26, 27 participants or authorised surrogates, and how (see Item 32)  
28  
29 ✓ 26b Additional consent provisions for collection and use of participant data  
30 and biological specimens in ancillary studies, if applicable  
31  
32 Confidentiality ✓ 27 How personal information about potential and enrolled participants will  
33, 34 be collected, shared, and maintained in order to protect confidentiality  
35 before, during, and after the trial  
36  
37 Declaration of ✓ 28 Financial and other competing interests for principal investigators for  
38 interests the overall trial and each study site  
39  
40 Access to data ✓ 29 Statement of who will have access to the final trial dataset, and  
41, 11 disclosure of contractual agreements that limit such access for  
42 investigators  
43  
44 Ancillary and ✓ 30 Provisions, if any, for ancillary and post-trial care, and for  
45, A post-trial care compensation to those who suffer harm from trial participation  
46  
47  
48, 12 Dissemination ✓ 31a Plans for investigators and sponsor to communicate trial results to  
49 policy participants, healthcare professionals, the public, and other relevant  
50 groups (eg, via publication, reporting in results databases, or other  
51 data sharing arrangements), including any publication restrictions  
52  
53, 12 ✓ 31b Authorship eligibility guidelines and any intended use of professional  
54 writers  
55  
56  
57, NA ✓ 31c Plans, if any, for granting public access to the full protocol, participant-  
58 level dataset, and statistical code  
59  
60

**Appendices**

|                           |                                                                                                                                                                                                |
|---------------------------|------------------------------------------------------------------------------------------------------------------------------------------------------------------------------------------------|
| Informed consent ✓ 32     | Model consent form and other related documentation given to participants and authorised surrogates                                                                                             |
| Biological specimens ✓ 33 | Plans for collection, laboratory evaluation, and storage of biological specimens for genetic or molecular analysis in the current trial and for future use in ancillary studies, if applicable |

---

\*It is strongly recommended that this checklist be read in conjunction with the SPIRIT 2013 Explanation & Elaboration for important clarification on the items. Amendments to the protocol should be tracked and dated. The SPIRIT checklist is copyrighted by the SPIRIT Group under the Creative Commons "[Attribution-NonCommercial-NoDerivs 3.0 Unported](#)" license.

For peer review only

# WHO Trial Registration Data Set (Version 1.3.1)

The minimum amount of trial information that must appear in a register in order for a given trial to be considered fully registered. There are currently 24 items in the WHO Trial Registration Data Set. It is sometimes referred to as the TRDS.

## 1. Primary Registry and Trial Identifying Number

Name of Primary Registry, and the unique ID number assigned by the Primary Registry to this trial.

*Page 4*

## 2. Date of Registration in Primary Registry

Date when trial was officially registered in the Primary Registry.

*December 7, 2021*

## 3. Secondary Identifying Numbers

Other identifiers besides the Trial Identifying Number allocated by the Primary Registry, if any. These include:

- The Universal Trial Number (UTN)
- Identifiers assigned by the sponsor (record Sponsor name and Sponsor-issued trial number (e.g. protocol number))
- Other trial registration numbers issued by other Registries (both Primary and Partner Registries in the WHO Registry Network, and other registries)
- Identifiers issued by funding bodies, collaborative research groups, regulatory authorities, ethics committees / institutional review boards, etc.

*Page 4*

All secondary identifiers will have 2 elements: an identifier for the issuing authority (e.g. NCT, ISRCTN, ACTRN) plus a number.

There is no limit to the number of secondary identifiers that can be provided.

## 4. Source(s) of Monetary or Material Support

Major source(s) of monetary or material support for the trial (e.g. funding agency, foundation, company, institution).

*Page 16*

## 5. Primary Sponsor

The individual, organization, group or other legal entity which takes responsibility for initiating, managing and/or financing a study. The Primary Sponsor is responsible for ensuring that the trial is properly registered. The Primary Sponsor may or may not be the main funder.

*Page 3*

## 6. Secondary Sponsor(s)

Additional individuals, organizations or other legal persons, if any, that have agreed with the primary sponsor to take on responsibilities of sponsorship.

A secondary sponsor may have agreed to:

- take on all the responsibilities of sponsorship jointly with the primary sponsor; or
- form a group with the Primary Sponsor in which the responsibilities of sponsorship are allocated among the members of the group; or act as the Primary Sponsor's legal representative in relation to some or all of the trial sites.

*Page 3 and page 16*

## 7. Contact for Public Queries

Email address, telephone number and postal address of the contact who will respond to general queries, including information about current recruitment status.

“Note: The information provided in here is functional and not personal, it is recommended to provide institutional and not personal information. By providing this information the registrant consents that the information provided can or may be published on a public website. Once provided the information cannot be redacted or anonymized as a result of new privacy legislation such as the European General Data Protection Regulation (GDPR)”.

*Page 2*

## 8. Contact for Scientific Queries

There must be clearly assigned responsibility for scientific leadership to a named Principal Investigator. The PI may delegate responsibility for dealing with scientific enquiries to a scientific contact for the trial. This scientific contact will be listed in addition to the PI.

“Note: The information provided in here is functional and not personal, it is recommended to provide institutional and not personal information. By providing this information the registrant consents that the information provided can or may be published on a public website. Once provided the information cannot be redacted or anonymized as a result of new privacy legislation such as the European General Data Protection Regulation (GDPR)”.

1  
2  
3  
4  
5 The contact for scientific queries must include:

- 6     o Name and title, email address, telephone number, postal address and  
7       affiliation of the Principal Investigator, and;
- 8     o Email address, telephone number, postal address and affiliation of the contact for  
9       scientific queries about the trial (if applicable). The details for the scientific contact  
10      may be generic (that is, there does not need to be a named individual): e.g. a  
11      generic email address for research team members qualified to answer scientific  
12      queries.  
13  
14

15 *Page 2*

16  
17 **9. Public Title**

18 Title intended for the lay public in easily understood language.

19 *Page 1*

20  
21  
22  
23 **10. Scientific Title**

24 Scientific title of the study as it appears in the protocol submitted for funding and  
25 ethical review. Include trial acronym if available.

26 *Page 2*

27  
28  
29 **11. Countries of Recruitment**

30 The countries from which participants will be, are intended to be, or have been  
31 recruited at the time of registration.

32 *Page 6*

33  
34  
35 **12. Health Condition(s) or Problem(s) Studied**

36 Primary health condition(s) or problem(s) studied (e.g., depression, breast cancer,  
37 medication error).

38  
39  
40 If the study is conducted in healthy human volunteers belonging to the target  
41 population of the intervention (e.g. preventive or screening interventions), enter the  
42 particular health condition(s) or problem(s) being prevented.

43 *Page 4 and pages 6-12*

44  
45  
46  
47 **13. Intervention(s)**

48 For each arm of the trial record a brief intervention name plus an intervention  
49 description.

50  
51 Intervention Name: For drugs use generic name; for other types of interventions  
52 provide a brief descriptive name.

- 53     o For investigational new drugs that do not yet have a generic name, a  
54       chemical name, company code or serial number may be used on a  
55       temporary basis. As soon as the generic name has been established, update  
56       the associated registered records accordingly.  
57  
58  
59  
60

- For non-drug intervention types, provide an intervention name with sufficient detail so that it can be distinguished from other similar interventions.

**Intervention Description:** Must be sufficiently detailed for it to be possible to distinguish between the arms of a study (e.g. comparison of different dosages of drug) and/or among similar interventions (e.g. comparison of multiple implantable cardiac defibrillators). For example, interventions involving drugs may include dosage form, dosage, frequency and duration.

If the intervention is one or more drugs then use the International Non-Proprietary Name for each drug if possible (not brand/trade names). For an unregistered drug, the generic name, chemical name, or company serial number is acceptable.

If the intervention consists of several separate treatments, list them all in one line separated by commas (e.g. "low-fat diet, exercise").

For controlled trials, the identity of the control arm should be clear. The control intervention(s) is/are the interventions against which the study intervention is evaluated (e.g. placebo, no treatment, active control). If an active control is used, be sure to enter in the name(s) of that intervention, or enter "placebo" or "no treatment" as applicable. For each intervention, describe other intervention details as applicable (dose, duration, mode of administration, etc).

*Page 4 and pages 6-12*

#### 14. Key Inclusion and Exclusion Criteria

Inclusion and exclusion criteria for participant selection, including age and sex. Other selection criteria may relate to clinical diagnosis and co-morbid conditions; exclusion criteria are often used to ensure patient safety.

If the study is conducted in healthy human volunteers not belonging to the target population (e.g. a preliminary safety study), enter "healthy human volunteer".

*Page 4 and pages 6-12*

#### 15. Study Type

Study type consists of:

- Type of study (interventional or observational)
- Study design including:
  - Method of allocation (randomized/non-randomized)
  - Masking (is masking used and, if so, who is masked)
  - Assignment (single arm, parallel, crossover or factorial)
  - Purpose
- Phase (if applicable)



For randomized trials: the allocation concealment mechanism and sequence generation will be documented.

*Page 4 and pages 6-12*

#### 16. **Date of First Enrollment**

Anticipated or actual date of enrolment of the first participant.

*Page 11*

#### 17. **Sample Size**

Sample Size consists of:

- Number of participants that the trial plans to enrol in total.
- Number of participants that the trial has enrolled.

*Page 9*

#### 18. **Recruitment Status**

Recruitment status of this trial:

- Pending: participants are not yet being recruited or enrolled at any site
- Recruiting: participants are currently being recruited and enrolled
- Suspended: there is a temporary halt in recruitment and enrolment
- Complete: participants are no longer being recruited or enrolled
- Other

*Page 10*

#### 19. **Primary Outcome(s)**

Outcomes are events, variables, or experiences that are measured because it is believed that they may be influenced by the intervention.

The Primary Outcome should be the outcome used in sample size calculations, or the main outcome(s) used to determine the effects of the intervention(s). Most trials should have only one primary outcome.

For each primary outcome provide:

- The name of the outcome (do not use abbreviations)
- The metric or method of measurement used (be as specific as possible)
- The timepoint(s) of primary interest

Example:

Outcome Name: Depression

Metric/method of measurement: Beck Depression Score

Timepoint: 18 weeks following end of treatment

1  
2  
3  
4  
5 *Page 4 and pages 6-12*  
6  
7  
8

9 **20. Key Secondary Outcomes**

10 Secondary outcomes are outcomes which are of secondary interest or that are  
11 measured at timepoints of secondary interest. A secondary outcome may involve  
12 the same event, variable, or experience as the primary outcome, but measured at  
13 timepoints other than those of primary interest.  
14

15 As for primary outcomes, for each secondary outcome provide:

- 16 ○ The name of the outcome (do not use abbreviations)
  - 17 ○ The metric or method of measurement used (be as specific as possible)
  - 18 ○ The timepoint(s) of interest
- 19  
20  
21

22 *Page 4 and pages 6-12*  
23  
24

25 **21. Ethics Review**

26 The ethics review process information of the trial record in the primary register  
27 database. It consists of:

- 28 ○ Status (possible values: Not approved, Approved, Not Available)
  - 29 ○ Date of approval
  - 30 ○ Name and contact details of Ethics committee(s)
- 31  
32

33 *Page 10*  
34  
35

36 **22. Completion date**

37 Date of study completion: The date on which the final data for a clinical study were  
38 collected (commonly referred to as, "last subject, last visit").  
39

40 *Unknown*  
41

42 **23. Summary Results**

43 It consists of:

- 44 ○ Date of posting of results summaries
- 45 ○ Date of the first journal publication of results
- 46 ○ URL hyperlink(s) related to results and publications
- 47 ○ Baseline Characteristics: Data collected at the beginning of a clinical study  
48 for all participants and for each arm or comparison group. These data include  
49 demographics, such as age and sex, and study-specific measures.
- 50 ○ Participant flow: Information to document the progress and numbers of  
51 research participants through each stage of a study in a flow diagram or  
52 tabular format.
- 53 ○ Adverse events: An unfavorable change in the health of a participant,  
54 including abnormal laboratory findings, and all serious adverse events and  
55 deaths that happen during a clinical study or within a certain time period after  
56  
57  
58  
59  
60

1  
2  
3  
4 the study has ended. This change may or may not be caused by the  
5 intervention being studied.

- 6  
7  
8  
9  
10  
11  
12  
13  
14  
15  
16
- Outcome measures: A table of data for each primary and secondary outcome measure and their respective measurement of precision (eg a 95% confidence interval) by arm (that is, initial assignment of participants to arms or groups) or comparison group (that is, analysis groups), including the result(s) of scientifically appropriate statistical analyses that were performed on the outcome measure data, if any.
  - URL link to protocol file(s) with version and date
  - Brief summary

17 *Awaiting*

18  
19  
20 **24. IPD sharing statement**

21 Statement regarding the intended sharing of deidentified individual clinical trial  
22 participant-level data (IPD). Should indicate whether or not IPD will be shared, what  
23 IPD will be shared, when, by what mechanism, with whom and for what types of  
24 analyses. It consists of:

- 25  
26  
27  
28
- Plan to share IPD (Yes, No)
  - Plan description

29  
30 *Page 12*
