# Supplementary material for: Comparing restrictive versus liberal oxygen strategies for trauma patients — the TRAUMOX2 trial: protocol for a randomised clinical trial
Source: PubMed Central journal article supplement — BMJ Open. 2022 Nov 7;12(11):e064047. doi: 10.1136/bmjopen-2022-064047 (PMC9644337; doi:10.1136/bmjopen-2022-064047), 2022-11-07
Supplement: bmjopen-2022-064047.reviewer_comments.pdf [file bmjopen-2022-064047.reviewer_comments.pdf]

## PEER REVIEW HISTORY

BMJ Open publishes all reviews undertaken for accepted manuscripts. Reviewers are asked to complete a checklist review form (<http://bmjopen.bmj.com/site/about/resources/checklist.pdf>) and are provided with free text boxes to elaborate on their assessment. These free text comments are reproduced below.

### ARTICLE DETAILS

|                            |                                                                                                                                                                                                                                                                                  |
|----------------------------|----------------------------------------------------------------------------------------------------------------------------------------------------------------------------------------------------------------------------------------------------------------------------------|
| <b>TITLE (PROVISIONAL)</b> | Comparing Restrictive vs. Liberal Oxygen Strategies for Trauma Patients - The TRAUMOX2 Trial: Protocol for a Randomised Clinical Trial                                                                                                                                           |
| <b>AUTHORS</b>             | Baekgaard, Josefine; Arleth, Tobias; Siersma, Volkert; Hinkelbein, Jochen; Yucetepe, Sirin; Klimek, M; van Vledder, Mark; Van Lieshout, Esther M.M.; Mikkelsen, Søren; Zwisler, Stine; Andersen, M. S.; Fenger-Eriksen, Christian; Isbye, Dan; Rasmussen, Lars; Steinmetz, Jacob |

### VERSION 1 – REVIEW

|                        |                                                                                                     |
|------------------------|-----------------------------------------------------------------------------------------------------|
| <b>REVIEWER</b>        | Peters, Mark<br>Great Ormond Street Hospital For Children NHS Trust, Paediatric Intensive Care Unit |
| <b>REVIEW RETURNED</b> | 08-Jun-2022                                                                                         |

|                         |                                                                                                                                                                                                                                                                                                                                                                                                                                                                                                                                                                                                                                                                                                                                                                                                                                                                                                                                                                                                                                                                                                                                                                                                                                                                                                                                                                                       |
|-------------------------|---------------------------------------------------------------------------------------------------------------------------------------------------------------------------------------------------------------------------------------------------------------------------------------------------------------------------------------------------------------------------------------------------------------------------------------------------------------------------------------------------------------------------------------------------------------------------------------------------------------------------------------------------------------------------------------------------------------------------------------------------------------------------------------------------------------------------------------------------------------------------------------------------------------------------------------------------------------------------------------------------------------------------------------------------------------------------------------------------------------------------------------------------------------------------------------------------------------------------------------------------------------------------------------------------------------------------------------------------------------------------------------|
| <b>GENERAL COMMENTS</b> | <p>Very much needed study - look forward to the results.</p> <p>Minor points - please present the FiO<sub>2</sub> (fraction of inspired oxygen) as a fraction e.g. 0.8 not as a percentage. There a a few example where this has slipped through.</p> <p>Please clarify if the target for the intervention is the peripheral oxygen saturation estimated by pulse oximetry (SpO<sub>2</sub>) or the directly measured arterial oxyhaemoglobin saturation(SaO<sub>2</sub>). Currently the wording is incorrect and could mean either: "arterial oxyhaemoglobin saturation (SpO<sub>2</sub>) target of 94%"</p> <p>For clarity I would suggest the sentence in both the abstract and the text:<br/>The primary outcome is the incidence of 30-day mortality and/or major respiratory complications (pneumonia and/or ARDS) (composite outcome).<br/>is reworded as<br/>The primary outcome is a composite of 30-day mortality and/or development of major respiratory complications (pneumonia and/or ARDS).</p> <p>Under "definitions" please expand the abbreviation AIS</p> <p>The text following the Ethics and Dissemination heading includes 4 (the last 4 before Protocol changes) paragraphs that do not appear to belong here. I suspect most of these could be deleted or greatly reduced and should appear in the description of the intervention earlier in the methods</p> |
|-------------------------|---------------------------------------------------------------------------------------------------------------------------------------------------------------------------------------------------------------------------------------------------------------------------------------------------------------------------------------------------------------------------------------------------------------------------------------------------------------------------------------------------------------------------------------------------------------------------------------------------------------------------------------------------------------------------------------------------------------------------------------------------------------------------------------------------------------------------------------------------------------------------------------------------------------------------------------------------------------------------------------------------------------------------------------------------------------------------------------------------------------------------------------------------------------------------------------------------------------------------------------------------------------------------------------------------------------------------------------------------------------------------------------|

|  |                                                                                    |
|--|------------------------------------------------------------------------------------|
|  | Discussion:<br>"time gap may be much larger" suggest "time gap may be much longer" |
|--|------------------------------------------------------------------------------------|

|                        |                                                                  |
|------------------------|------------------------------------------------------------------|
| <b>REVIEWER</b>        | Douin, David<br>University of Colorado Denver School of Medicine |
| <b>REVIEW RETURNED</b> | 09-Jun-2022                                                      |

|                         |                                                                                                                                                                                                                                                                                                                                                                                                                                                                                                                                                                                                                                                                                                                                                                                                                                                                                                                                                                                                                                                                                                                                                                                                                |
|-------------------------|----------------------------------------------------------------------------------------------------------------------------------------------------------------------------------------------------------------------------------------------------------------------------------------------------------------------------------------------------------------------------------------------------------------------------------------------------------------------------------------------------------------------------------------------------------------------------------------------------------------------------------------------------------------------------------------------------------------------------------------------------------------------------------------------------------------------------------------------------------------------------------------------------------------------------------------------------------------------------------------------------------------------------------------------------------------------------------------------------------------------------------------------------------------------------------------------------------------|
| <b>GENERAL COMMENTS</b> | <p>The authors report a protocol for the ongoing TRAUMOX2 trial, comparing restrictive versus liberal oxygen strategies for major trauma patients. While the benefits of avoiding hyperoxemia in critically ill patients are well-established, an important knowledge gap exists in trauma patients. The authors' protocol is detailed, well written, and thoroughly explains their expected methods and reporting of results. I have only minor comments:</p> <p>1) Please elaborate on and support your choice of 94% as the lower limit for SpO2 in the restrictive group. Why not target an SpO2 of at least 92%, or even 90%?</p> <p>2) You mention pneumonia is diagnosed via CDC criteria (including citation), however, you do not elaborate further. Pneumonia tends to be a heterogeneous disease with a variety of clinical manifestations and severities. Since pneumonia is a major component of your primary composite endpoint, it is important to be clear how you will diagnose this condition. Please include your criteria for diagnosis of pneumonia on page 12, line 35.</p> <p>3) Please also include a short description of the Berlin Criteria for ARDS, as you have done for TBI.</p> |
|-------------------------|----------------------------------------------------------------------------------------------------------------------------------------------------------------------------------------------------------------------------------------------------------------------------------------------------------------------------------------------------------------------------------------------------------------------------------------------------------------------------------------------------------------------------------------------------------------------------------------------------------------------------------------------------------------------------------------------------------------------------------------------------------------------------------------------------------------------------------------------------------------------------------------------------------------------------------------------------------------------------------------------------------------------------------------------------------------------------------------------------------------------------------------------------------------------------------------------------------------|

### VERSION 1 – AUTHOR RESPONSE

Reviewer: 1

Prof. Mark Peters, Great Ormond Street Hospital For Children NHS Trust, University College London  
Comments to the Author: Very much needed study - look forward to the results.

Minor points - please present the FiO2 (fraction of inspired oxygen) as a fraction e.g. 0.8 not as a percentage. There are a few examples where this has slipped through.

Thank you, this has been adjusted.

Please clarify if the target for the intervention is the peripheral oxygen saturation estimated by pulse oximetry (SpO2) or the directly measured arterial oxyhaemoglobin saturation(SaO2).

Currently the wording is incorrect and could mean either: "arterial oxyhaemoglobin saturation (SpO2) target of 94%"

Thank you, this has been clarified on page 6. The target is indeed the arterial oxyhaemoglobin saturation (SaO2) measured by pulse oximetry (SpO2).

For clarity I would suggest the sentence in both the abstract and the text:

The primary outcome is the incidence of 30-day mortality and/or major respiratory complications (pneumonia and/or ARDS) (composite outcome).

is reworded as

The primary outcome is a composite of 30-day mortality and/or development of major respiratory complications (pneumonia and/or ARDS).

Thank you for this suggestion. The sentence has been changed accordingly.

Under "definitions" please expand the abbreviation AIS

Thank you for pointing this out, it has been expanded.

The text following the Ethics and Dissemination heading includes 4 (the last 4 before Protocol changes) paragraphs that do not appear to belong here. I suspect most of these could be deleted or greatly reduced and should appear in the description of the intervention earlier in the methods. Thank you, these were meant as further explanations on the ethics, but have now been deleted as per your suggestion.

Discussion:

"time gap may be much larger" suggest "time gap may be much longer"

Thank you, this has been changed.

Reviewer: 2

Dr. David Douin, University of Colorado Denver School of Medicine

Comments to the Author:

The authors report a protocol for the ongoing TRAUMOX2 trial, comparing restrictive versus liberal oxygen strategies for major trauma patients. While the benefits of avoiding hyperoxemia in critically ill patients are well-established, an important knowledge gap exists in trauma patients. The authors' protocol is detailed, well written, and thoroughly explains their expected methods and reporting of results. I have only minor comments:

1) Please elaborate on and support your choice of 94% as the lower limit for SpO<sub>2</sub> in the restrictive group. Why not target an SpO<sub>2</sub> of at least 92%, or even 90%?

Thank you for this question. The target of 94% has been carefully chosen and is based on previous studies as explained in the discussion, page 13, 2nd paragraph.

"A large randomised study on patients with myocardial infarction showed that targeting an SpO<sub>2</sub> of 94% resulted in a decrease in myocardial injury and myocardial infarct size.[37] Another study has shown a dramatic increase in the occurrence of hyperoxaemia when SpO<sub>2</sub> was above 95%,[38] and for those reasons, we have chosen SpO<sub>2</sub> 94% to be the target in the restrictive group."

37 Stub Dion, Smith Karen, Bernard Stephen, et al. Air Versus Oxygen in ST-Segment–Elevation Myocardial Infarction. *Circulation* 2015;131:2143–50. doi:10.1161/CIRCULATIONAHA.114.014494

38 Durlinger EMJ, Spoelstra-de Man AME, Smit B, et al. Hyperoxia: At what level of SpO<sub>2</sub> is a patient safe? A study in mechanically ventilated ICU patients. *J Crit Care* 2017;39:199–204.

doi:10.1016/j.jcrc.2017.02.031

Furthermore, as mentioned in the discussion as well, the British Thoracic Society recommends initial management with high-concentration oxygen therapy and a target SpO<sub>2</sub> of 94–98% for both hypoxaemic patients and patients 'at risk of hypoxaemia'. We have therefore been inspired by their lower limit for our trial.

O'Driscoll BR, Howard LS, Earis J, et al. BTS guideline for oxygen use in adults in healthcare and emergency settings. *Thorax* 2017;72:ii1–90. doi:10.1136/thoraxjnl-2016-209729

In addition the consensus statement of the Seattle International Traumatic Brain Injury Conference recommends that the initial treatment of TBI patients should be an SpO<sub>2</sub>>94 (Hawryluk et al. *Intensive care Med* 2019; 45:1783–1794).

Finally, in the pilot trial, TRAUMOX1 maintenance of normoxaemia post trauma appeared feasible and there were few episodes of hypoxaemia using the same target.

Baekgaard JS, Isbye D, Ottosen CI, et al. Restrictive vs liberal oxygen for trauma patients-the TRAUMOX1 pilot randomised clinical trial. Acta Anaesthesiol Scand;63:947–55. doi:10.1111/aas.13362

2) You mention pneumonia is diagnosed via CDC criteria (including citation), however, you do not elaborate further. Pneumonia tends to be a heterogeneous disease with a variety of clinical manifestations and severities. Since pneumonia is a major component of your primary composite endpoint, it is important to be clear how you will diagnose this condition. Please include your criteria for diagnosis of pneumonia on page 12, line 35.

3) Please also include a short description of the Berlin Criteria for ARDS, as you have done for TBI.

Question 2 and 3:

Thank you for this suggestion. The details of the criteria for the diagnosis of pneumonia and ARDS are outlined in figure 2.

If the editor agrees, we are happy to include it in the text as well.

Reviewer: 1

Competing interests of Reviewer: Chief Investigator of NIHR HTA funded Oxy-PICU-PICU trial of Conservative vs Liberal Oxygenation Strategies in Critically Ill Children

Reviewer: 2

Competing interests of Reviewer: I am a contributing member of a similar trial, the SAVE-O2 clinical trial (NCT04534959).

#### VERSION 2 – REVIEW

|                         |                                                                               |
|-------------------------|-------------------------------------------------------------------------------|
| <b>REVIEWER</b>         | Douin, David<br>University of Colorado Denver School of Medicine              |
| <b>REVIEW RETURNED</b>  | 09-Sep-2022                                                                   |
| <b>GENERAL COMMENTS</b> | Thank you for responding to all comments. No additional comments at this time |
